# Supplementary material for: Synthesis of imidazo[4,5-e][1,3]thiazino[2,3-c][1,2,4]triazines via a base-induced rearrangement of functionalized imidazo[4,5-e]thiazolo[2,3-c][1,2,4]triazines
Source: publisher site journal article supplement (doi:10.3762/bjoc.19.80), 2023-07-28

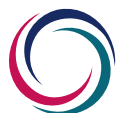

## Supporting Information

for

### **Synthesis of imidazo[4,5-e][1,3]thiazino[2,3-c][1,2,4]triazines via a base-induced rearrangement of functionalized imidazo[4,5-e]thiazolo[2,3-c][1,2,4]triazines**

Dmitry B. Vinogradov, Alexei N. Izmet's'ev, Angelina N. Kravchenko, Yuri A. Strelenko and Galina A. Gazieva

*Beilstein J. Org. Chem.* **2023**, *19*, 1047–1054. doi:10.3762/bjoc.19.80

## Experimental and analytical data

## Table of contents

|                                                                                                                                                                                    |     |
|------------------------------------------------------------------------------------------------------------------------------------------------------------------------------------|-----|
| 1. Experimental.....                                                                                                                                                               | S2  |
| 2. Synthesis of compounds <b>1c,f,i</b> .....                                                                                                                                      | S2  |
| 3. Synthesis of compounds <b>2c,i,j</b> .....                                                                                                                                      | S3  |
| 4. General procedure for the synthesis of potassium imidazo[4,5- <i>e</i> ][1,3]thiazino[2,3- <i>c</i> ][1,2,4]triazine-7-carboxylates <b>3a-m</b> .....                           | S4  |
| 5. General procedure for the synthesis of (imidazo[4,5- <i>e</i> ]thiazolo[2,3- <i>c</i> ][1,2,4]triazin-6-ylidene)acetic acid <b>4a,b</b> .....                                   | S7  |
| 6. General procedure for the synthesis of imidazo[4,5- <i>e</i> ][1,3]thiazino[2,3- <i>c</i> ][1,2,4]triazine-7-carboxylic acid <b>5a-k,m</b> .....                                | S8  |
| 7. Procedure for the synthesis imidazo[4,5- <i>e</i> ][1,2,4]triazines <b>7i,j</b> .....                                                                                           | S11 |
| 8. Procedure for the synthesis of compounds <b>9k,l</b> .....                                                                                                                      | S12 |
| 9. Procedure for the synthesis of 1-(4-chlorophenyl)-3-methylthiourea <b>10</b> .....                                                                                              | S13 |
| 10. Procedure for the synthesis of 1-(4-chlorophenyl)-4,5-dihydroxy-3-methylimidazolidine-2-thione <b>11j</b> .....                                                                | S13 |
| 11. Crystallographic data.....                                                                                                                                                     | S13 |
| 12. References .....                                                                                                                                                               | S14 |
| 13. <sup>1</sup> H NMR monitoring of the rearrangement of <b>1d</b> into <b>3d</b> .....                                                                                           | S15 |
| 14. Spectra <sup>1</sup> H and <sup>13</sup> C NMR of <b>1c,f,i</b> and <b>2c,i,j</b> .....                                                                                        | S16 |
| 15. Spectra <sup>1</sup> H and <sup>13</sup> C NMR of <b>3a-m</b> , <sup>1</sup> H- <sup>13</sup> C HMBC NMR of <b>3k</b> .....                                                    | S28 |
| 16. Spectra <sup>1</sup> H and <sup>13</sup> C NMR of <b>4a,b</b> , <sup>1</sup> H- <sup>13</sup> C HMBC NMR of <b>4a</b> .....                                                    | S55 |
| 17. Spectra <sup>1</sup> H, <sup>13</sup> C NMR of <b>5a-k,m</b> , <sup>1</sup> H- <sup>13</sup> C HSQC of <b>5k</b> and <sup>1</sup> H- <sup>13</sup> C HMBC of <b>5a,k</b> ..... | S60 |
| 18. Spectra <sup>1</sup> H and <sup>13</sup> C NMR of <b>7i,j</b> .....                                                                                                            | S87 |
| 19. Spectra <sup>1</sup> H, <sup>13</sup> C, <sup>1</sup> H- <sup>13</sup> C HMBC NMR of <b>9k,l</b> .....                                                                         | S91 |
| 20. Spectra <sup>1</sup> H and <sup>13</sup> C NMR of <b>10</b> .....                                                                                                              | S97 |
| 21. Spectra <sup>13</sup> C NMR GATED of <b>4a</b> and <b>5a</b> .....                                                                                                             | S99 |

## Experimental

Melting points were determined in open glass capillaries on a Gallenkamp (Sanyo) melting point apparatus. The  $^1\text{H}$  and  $^{13}\text{C}$  NMR spectra were recorded on Bruker AM300 (300.13 MHz), Bruker DRX500 (500.13 MHz) and Bruker AV600 (600.13 MHz) spectrometers using  $\text{DMSO-}d_6$  as solvent. Chemical shifts ( $\delta$ ) are given in ppm from TMS as an internal standard. IR spectra were recorded on a Bruker ALPHA instrument in KBr pellets. High resolution mass spectra (HRMS) were measured on a Bruker micrOTOF II instrument using electrospray ionization (ESI). The measurements were done in a positive ion mode (interface capillary voltage–4500 V) or in a negative ion mode (3200 V); mass range from  $m/z$  50 to  $m/z$  3000 Da; external or internal calibration was done with electrospray calibrant solution (Fluka). A syringe injection was used for solutions in acetonitrile or methanol (flow rate 3 mL min $^{-1}$ ). Nitrogen was applied as a dry gas; the interface temperature was set at 180 °C. All the reagents were purchased from Acros Organics and used without further purification.

Compounds **1a,b,d,e,g,h** and **2a,b,d,e,g,h**,<sup>1</sup> **7c**,<sup>2</sup> **8a–c**<sup>3</sup> and **11i**<sup>4</sup> were prepared according to known procedures.

### Synthesis of compounds **1c,f,i**

For **1c**: Diethyl acetylenedicarboxylate (2.1 mmol) was added to a refluxing suspension of 5,7-dipropyl-3-thioxohexahydro-1*H*-imidazo[4,5-*e*][1,2,4]triazin-6(2*H*)-one (**6c**, 2 mmol) in 4 mL of EtOH and the mixture was refluxed for 2 h. Then, triethylamine (0.275 mL, 2 mmol) was added to the suspension, and the mixture was refluxed for additional 4 h. After cooling, the precipitate of compound **1c** was filtered off, washed with MeOH, and dried.

For **1f**: Diethyl acetylenedicarboxylate (2.1 mmol) was added to a refluxing suspension of 5,7-dimethyltetrahydro-1*H*-imidazo[4,5-*e*][1,2,4]triazine-3,6(2*H*,4*H*)-dithione (**6f**, 2 mmol) in 4 mL of MeOH and the mixture was refluxed for 4 h. After cooling, the precipitate of compound **1f** was filtered off, washed with MeOH, and dried.

For **1i**: EtONa as 21% in ethanol (0.187 mL, 0.5 mmol) was added to a refluxing suspension of ester **2i** (1 mmol) in EtOH (10 mL) and the mixture was refluxed for 1 h. After cooling, the precipitate of compound **1i** was filtered off and washed with MeOH.

**Ethyl (Z)-2-(2,8-dioxo-1,3-dipropyl-1,2,3,3a,4,9a-hexahydroimidazo[4,5-*e*]thiazolo[2,3-*c*][1,2,4]triazin-7(8*H*)-ylidene)acetate (1c)**. Yield 312 mg (41%); yellow solid; mp: 138–140 °C. IR (KBr):  $\nu$  3272 (NH), 3080 (=CH), 2969, 2936, 2875 (Alk), 1690, 1649 (C=O) cm $^{-1}$ .  $^1\text{H}$  NMR (600 MHz,  $\text{DMSO-}d_6$ ):  $\delta$  0.75–0.84 (m, 6H, 2CH $_3$ ), 1.25 (t,  $J$  = 7.1 Hz, 3H, CH $_3$ ), 1.35–1.50 (m, 3H, CH $_2$ ), 1.53–1.67 (m, 1H, CH $_2$ ), 2.90–3.03 (m, 1H, NCH $_2$ ), 3.09–3.13 (m, 1H, NCH $_2$ ), 3.16–3.23 (m, 1H, NCH $_2$ ), 4.23 (q,  $J$  = 7.1 Hz, 2H, OCH $_2$ ), 4.87 (dd,  $J$  = 5.8, 2.2 Hz, 1H, 3a-H), 5.71 (d,  $J$  = 5.9 Hz, 1H, 9a-H), 6.72 (s, 1H, =CH), 8.04 (d,  $J$  = 2.2 Hz, 1H, 4-NH).  $^{13}\text{C}$  NMR (150 MHz,  $\text{DMSO-}d_6$ ):  $\delta$  11.05, 11.10, 14.05 (3CH $_3$ ), 20.48, 20.74 (2CH $_2$ ), 41.82, 44.68 (2NCH $_2$ ), 61.39, 62.21, 64.14 (OCH $_2$ , C-3a, C-9a), 113.59 (=CH), 134.95 (5a-C=N), 141.79 (C-7), 158.28, 162.74 (2-C=O, 8-C=O), 165.71 (COOEt). HRMS (ESI):  $m/z$  [ $M + \text{H}$ ] $^+$  calcd for  $\text{C}_{16}\text{H}_{23}\text{N}_5\text{O}_4\text{S}$ : 382.1544; found: 382.1545.

**(Z)-Ethyl 2-(1,3-dimethyl-8-oxo-2-thioxo-1,2,3,3a,4,9a-hexahydroimi-dazo[4,5-*e*]thiazolo[2,3-*c*][1,2,4]triazin-7(8*H*)-ylidene)acetate (1f).** Yield 450 mg (66%); orange solid; mp: 236–238 °C. IR (KBr):  $\nu$  3272 (NH), 3080 (=CH), 2969, 2936, 2875 (Alk), 1690, 1649 (C=O)  $\text{cm}^{-1}$ .  $^1\text{H}$  NMR (300 MHz, DMSO- $d_6$ ):  $\delta$  1.26 (t,  $J$  = 7.1 Hz, 3H, CH<sub>3</sub>), 2.95 (s, 3H, NCH<sub>3</sub>), 3.17 (s, 3H, NCH<sub>3</sub>), 4.25 (q,  $J$  = 7.1 Hz, 2H, OCH<sub>2</sub>), 5.13 (d,  $J$  = 6.1 Hz, 1H, 3a-H), 5.88 (d,  $J$  = 6.2 Hz, 1H, 9a-H), 6.74 (s, 1H, =CH), 8.25 (d,  $J$  = 1.7 Hz, 1H, NH).  $^{13}\text{C}$  NMR (75 MHz, DMSO- $d_6$ ):  $\delta$  14.06 (CH<sub>3</sub>), 31.46, 35.46 (2NCH<sub>3</sub>), 61.46, 66.90, 67.52 (OCH<sub>2</sub>, C-3a, C-9a), 113.93 (=CH), 136.06 (5a-C=N), 141.47 (C-7), 162.51, 165.68 (2-C=O, 8-C=O), 183.79 (COOEt). HRMS (ESI):  $m/z$  [ $M$  +  $H$ ]<sup>+</sup> calcd for C<sub>12</sub>H<sub>16</sub>N<sub>5</sub>O<sub>3</sub>S<sub>2</sub>: 342.0689; found: 342.0698.

**(Z)-Ethyl 2-(3-(2-hydroxyethyl)-8-oxo-1-phenyl-2-thioxo-1,2,3,3a,4,9a-hexahydroimidazo[4,5-*e*]thiazolo[2,3-*c*][1,2,4]triazin-7(8*H*)-ylidene)acetate (1i).** Yield 165 mg (38%); bright yellow solid; mp: 226–227 °C. IR (KBr):  $\nu$  3498, 3291 (NH), 3087, 3061 (=CH), 2956, 2928, 2875 (Alk), 1725, 1669, 1649 (C=O)  $\text{cm}^{-1}$ .  $^1\text{H}$  NMR (300 MHz, DMSO- $d_6$ ):  $\delta$  1.24 (t,  $J$  = 7.1 Hz, 3H, CH<sub>3</sub>), 3.55–3.69 (m, 3H, CH<sub>2</sub>), 3.84–3.89 (m, 3H, CH<sub>2</sub>), 4.22 (q,  $J$  = 6.9 Hz, 2H, OCH<sub>2</sub>), 5.46 (d,  $J$  = 6.2 Hz, 1H, 3a-H), 6.35 (d,  $J$  = 6.3 Hz, 1H, 9a-H), 6.50 (s, 1H, =CH), 7.23–7.39 (m, 5H, Ph), 8.20 (d,  $J$  = 0.8 Hz, 1H, NH).  $^{13}\text{C}$  NMR (75 MHz, DMSO- $d_6$ ):  $\delta$  14.03 (CH<sub>3</sub>), 46.41 (NCH<sub>2</sub>), 58.33, 61.48, 66.00, 67.80 (2OCH<sub>2</sub>, C-3a, C-9a), 113.99 (=CH), 127.61, 128.53, 128.84 (Ph-2-6), 135.49, 139.09, 141.24 (5a-C=N, C-7m Ph-1), 161.20 (8-C=O), 165.61 (COOEt), 182.42 (2-C=S). HRMS (ESI):  $m/z$  [ $M$  +  $H$ ]<sup>+</sup> calcd for C<sub>18</sub>H<sub>19</sub>N<sub>5</sub>O<sub>4</sub>S<sub>2</sub>: 434.0951; found: 434.0954.

### Synthesis of compounds 2c,i,j

For **2c**: Diethyl acetylenedicarboxylate (2.1 mmol) was added to a suspension of 5,7-dipropyl-3-thioxohexahydro-1*H*-imidazo[4,5-*e*][1,2,4]triazin-6(2*H*)-one (**7c**, 2 mmol) in glacial AcOH (4 mL), and the mixture was stirred at room temperature for 4 h. The reaction mass was poured into 40 mL of distilled water, the precipitate of compound **2c** that formed was filtered off, washed with water, and dried.

For **2i,j**: Diethyl acetylenedicarboxylate (3 mmol for **2i** or 2.2 mmol for **2j**) was added to a refluxing suspension of imidazo[4,5-*e*][1,2,4]triazines **7i,j** (2 mmol) in MeOH (4 mL) and the mixture was refluxed for 6 h. After cooling, the precipitate of compounds **2i,j** were filtered off, washed with MeOH, and dried.

**Ethyl (Z)-2-(2,7-dioxo-1,3-dipropyl-1,2,3,3a,9,9a-hexahydroimidazo[4,5-*e*]thiazolo[3,2-*b*][1,2,4]triazin-6(7*H*)-ylidene)acetate (2c).** Yield 541 mg (71%); pale yellow solid; mp: 132–134 °C. IR (KBr):  $\nu$  3231 (NH), 3075 (=CH), 2966, 2934, 2875 (Alk), 1733, 1692, 1651 (C=O, C=N, C=C)  $\text{cm}^{-1}$ .  $^1\text{H}$  NMR (600 MHz, DMSO- $d_6$ ):  $\delta$  0.71 (t,  $J$  = 7.4 Hz, 3H, CH<sub>3</sub>), 0.87 (t,  $J$  = 7.4 Hz, 3H, CH<sub>3</sub>), 1.25 (t,  $J$  = 7.1 Hz, 3H, CH<sub>3</sub>), 1.34–1.45 (m, 2H, CH<sub>2</sub>), 1.46–1.63 (m, 2H, CH<sub>2</sub>), 2.94–2.98 (m, 1H, NCH<sub>2</sub>), 3.00–3.11 (m, 2H, NCH<sub>2</sub>), 3.18–3.28 (m, 1H, NCH<sub>2</sub>), 4.24 (q,  $J$  = 7.1 Hz, 2H, OCH<sub>2</sub>), 4.88 (dd,  $J$  = 6.0, 2.3 Hz, 1H, 9a-H), 4.91 (d,  $J$  = 6.0 Hz, 1H, 3a-H), 6.82 (s, 1H, =CH), 6.89 (d,  $J$  = 2.4 Hz, 1H, 9-NH).  $^{13}\text{C}$  NMR (150 MHz, DMSO- $d_6$ ):  $\delta$  10.93, 11.30, 13.99 (3CH<sub>3</sub>), 20.71, 20.98 (2CH<sub>2</sub>), 42.26, 42.50 (2NCH<sub>2</sub>), 61.61, 63.64, 65.01 (OCH<sub>2</sub>, C-3a, C-9a), 116.50 (=CH), 139.01 (C-6), 148.75 (4a-C=N),

158.28, 159.18 (2-C=O, 7-C=O), 165.30 (COOEt). HRMS (ESI):  $m/z$  [ $M + H$ ]<sup>+</sup> calcd for C<sub>16</sub>H<sub>23</sub>N<sub>5</sub>O<sub>4</sub>S: 382.1544; found: 382.1541.

**(Z)-Ethyl 2-(1-(2-hydroxyethyl)-7-oxo-3-phenyl-2-thioxo-1,2,3,3a,9,9a-hexahydroimidazo[4,5-*e*]thiazolo[3,2-*b*][1,2,4]triazin-6(7*H*)-ylidene)acetate (2i).** Yield 485 mg (56%); pale yellow solid; mp: 131–133 °C. <sup>1</sup>H NMR (300 MHz, DMSO-*d*<sub>6</sub>): δ 1.27 (t, *J* = 7.1 Hz, 3H, CH<sub>3</sub>), 3.50–3.56 (m, 1H, CH<sub>2</sub>), 3.61–3.67 (m, 3H, NCH<sub>2</sub>), 4.26 (q, *J* = 7.0 Hz, 2H, OCH<sub>2</sub>), 5.51–5.57 (m, 2H, 3a-H, 9a-H), 6.88 (s, 1H, =CH), 7.21 (s, 1H, NH), 7.30 (t, *J* = 7.3 Hz, 1H, Ph-4), 7.43 (t, *J* = 7.7 Hz, 2H, Ph-3,5), 7.57 (d, *J* = 7.7 Hz, 2H, Ph-3,5). <sup>13</sup>C NMR (75 MHz, DMSO-*d*<sub>6</sub>): δ 14.04 (CH<sub>3</sub>), 45.53 (NCH<sub>2</sub>), 57.94, 61.76, 68.00, 68.31 (2OCH<sub>2</sub>, C-3a, C-9a), 116.85 (=CH), 126.67, 127.48, 128.42 (Ph-2-6), 138.72, 138.79 (Ph-1, C-6), 150.55 (4a-C=N), 159.30 (7-C=O), 165.40 (COOEt), 180.61 (2-C=S). HRMS (ESI):  $m/z$  [ $M + H$ ]<sup>+</sup> calcd for C<sub>18</sub>H<sub>19</sub>N<sub>5</sub>O<sub>4</sub>S<sub>2</sub>: 434.0951; found: 434.0938.

**(Z)-Ethyl 2-(3-(4-chlorophenyl)-1-methyl-7-oxo-2-thioxo-1,2,3,3a,9,9a-hexahydroimidazo[4,5-*e*]thiazolo[3,2-*b*][1,2,4]triazin-6(7*H*)-ylidene)acetate (2j).** Yield 428 mg (49%); pale yellow solid; mp: 233–235 °C. IR (KBr): ν 3387, 3225 (NH), 3087 (=CH), 2978, 2935, 2913 (Alk), 1741, 1695, 1651, 1616 (C=O, C=N, C=C) cm<sup>-1</sup>. <sup>1</sup>H NMR (300 MHz, DMSO-*d*<sub>6</sub>): δ 1.27 (t, *J* = 7.1 Hz, 3H, CH<sub>3</sub>), 3.02 (s, 3H, CH<sub>3</sub>), 4.26 (q, *J* = 7.1 Hz, 2H, OCH<sub>2</sub>), 5.34 (d, *J* = 6.6 Hz, 1H, 9a-H), 5.58 (d, *J* = 6.6 Hz, 1H, 3a-H), 6.87 (s, 1H, =CH), 7.25 (s, 1H, NH), 7.49 (d, *J* = 8.6 Hz, 2H, Ar), 7.63 (d, *J* = 8.7 Hz, 2H, Ar). <sup>13</sup>C NMR (75 MHz, DMSO-*d*<sub>6</sub>): δ 14.01 (CH<sub>3</sub>), 30.83 (NCH<sub>3</sub>), 61.73 (OCH<sub>2</sub>), 68.03, 68.21 (C-3a, C-9a), 116.86 (=CH), 128.38, 128.82, 130.80 (Ph-2-6), 137.72, 138.76 (Ph-1, C-6), 150.69 (4a-C=N), 159.24 (7-C=O), 165.35 (COOEt), 180.78 (2-C=S). HRMS (ESI):  $m/z$  [ $M + H$ ]<sup>+</sup> calcd for C<sub>17</sub>H<sub>16</sub>N<sub>5</sub>O<sub>3</sub>S<sub>2</sub>: 438.0456; found: 438.0446.

### General procedure for the synthesis of potassium imidazo[4,5-*e*][1,3]thiazino[2,3-*c*][1,2,4]triazine-7-carboxylates 3a-m

Method A (for **3a–i**): To a stirring suspension of imidazo[4,5-*e*]thiazolo[2,3-*c*][1,2,4]triazines **1a–i** (1 mmol) in MeOH (3.5 mL for **3a,b** or 7 mL for **3c–i**), 0.250 mL KOH (2.5 mmol, 40% aq. solution) was added and the mixture was stirred at room temperature for 4 h. The precipitate of compounds **3a,b,j** was filtered off, washed with MeOH, and dried. For compounds **3c–i** the reaction mixtures were evaporated at reduced pressure. Compounds **3c–i** were used without isolation.

Method B (for **3a–d,j**): To a stirring suspension of imidazo[4,5-*e*]thiazolo[3,2-*b*][1,2,4]triazines **2a–d,j** (1 mmol) in MeOH (3.5 mL for **3a,b** or 7 mL for **3c,d,j**), 0.250 mL KOH (2.5 mmol, 40% aq. solution) was added and the mixture was stirred at room temperature for 4 h. The precipitate of compounds **3a,b,j** was filtered off, washed with MeOH, and dried. For compounds **3c,d** the reaction mixtures were evaporated at reduced pressure. Compounds **3c,d** were used without isolation.

Method C (for **3a**): Diethyl acetylenedicarboxylate (1.05 mmol) was added to a refluxing suspension of 3-thioxoimidazo[4,5-*e*][1,2,4]triazine (**7a**, 1 mmol) in 10 mL of MeOH and the mixture was refluxed for 2 h. The reaction mixture was cooled, 0.250 mL KOH (2.5 mmol, 40% aq. solution) was added and stirred at room temperature for 4 h.

The reaction mixture was evaporated at reduced pressure. The residue in the flask was triturated with MeCN (3 mL), the precipitate of compound **3a** was filtered off, washed with MeCN, and dried.

Method D (for **3k–m**): To a stirring suspension of imidazo[4,5-*e*]thiazolo[2,3-*c*][1,2,4]triazines **8a–c** (1 mmol) in MeOH (10 mL), KOH (40% aq. solution, 0.250 mL (2.5 mmol) for **3k** or 0.350 mL (3.5 mmol) for **3l,m**) was added and the mixture was stirred at room temperature (1 h for **3k** or 24 h for **3l,m**). The reaction mixtures were evaporated at reduced pressure. Compounds **3k–m** were used without isolation.

**Potassium 1,3-dimethyl-2,9-dioxo-1,2,3,3a,4,10a-hexahydro-9H-imidazo[4,5-*e*][1,3]thiazino[2,3-*c*][1,2,4]triazine-7-carboxylate (3a).** Method A: yield 241 mg (81%); method B: yield 199 mg (67%); method C: yield 205 mg (69%); pale yellow solid; mp: 273–275 °C. IR (KBr):  $\nu$  3284, 3258 (NH), 3061 (=CH), 2986, 2906, 2869 (Alk), 1722, 1688, 1632 (C=O, C=N, C=C)  $\text{cm}^{-1}$ .  $^1\text{H}$  NMR (300 MHz, DMSO-*d*<sub>6</sub>):  $\delta$  2.58 (s, 6H, 2CH<sub>3</sub>), 5.02 (d,  $J$  = 8.4 Hz, 1H, 3a-H), 6.20 (d,  $J$  = 8.4 Hz, 1H, 10a-H), 6.34 (s, 1H, =CH), 7.79 (s, 1H, 4-NH).  $^{13}\text{C}$  NMR (75 MHz, DMSO-*d*<sub>6</sub>):  $\delta$  27.35, 28.37 (2CH<sub>3</sub>), 66.64, 69.99 (C-3a, C-10a), 113.30 (=CH), 139.66 (C-7), 154.94, 157.67, 161.53, 162.80 (5a-C=N, 2-C=O, 9-C=O, COOK). HRMS (ESI):  $m/z$  [ $M + \text{H}$ ]<sup>+</sup> calcd for C<sub>10</sub>H<sub>11</sub>N<sub>5</sub>O<sub>4</sub>S: 298.0605; found: 298.0607.

**Potassium 1,3-diethyl-2,9-dioxo-1,2,3,3a,4,10a-hexahydro-9H-imidazo[4,5-*e*][1,3]thiazino[2,3-*c*][1,2,4]triazine-7-carboxylate (3b).** Method A: yield 205 mg (63%); method B: yield 211 mg (65%); yellow solid; mp: 260–262 °C. IR (KBr):  $\nu$  3281 (NH), 3073, 3051 (=CH), 2988, 2952, 2940, 2875 (Alk), 1710, 1664, 1629, 1609 (C=O, C=N, C=C)  $\text{cm}^{-1}$ .  $^1\text{H}$  NMR (300 MHz, DMSO-*d*<sub>6</sub>):  $\delta$  0.95 (t,  $J$  = 7.1 Hz, 6H, 2CH<sub>3</sub>), 2.81–2.93 (m, 1H, NCH<sub>2</sub>), 2.96–3.07 (m, 1H, NCH<sub>2</sub>), 3.11–3.31 (m, 2H, NCH<sub>2</sub>), 5.18 (d,  $J$  = 8.7 Hz, 1H, 3a-H), 6.28 (d,  $J$  = 8.7 Hz, 1H, 10a-H), 6.33 (s, 1H, =CH), 7.76 (s, 1H, 4-NH).  $^{13}\text{C}$  NMR (75 MHz, DMSO-*d*<sub>6</sub>):  $\delta$  12.63, 13.93 (2CH<sub>3</sub>), 34.60, 36.00 (2NCH<sub>2</sub>), 65.56, 68.47 (C-3a, C-10a), 113.74 (=CH), 140.40 (C-7), 155.89, 157.02, 161.79, 163.37 (5a-C=N, 2-C=O, 9-C=O, COOK). HRMS (ESI):  $m/z$  [ $M + \text{H}$ ]<sup>+</sup> calcd for C<sub>12</sub>H<sub>15</sub>N<sub>5</sub>O<sub>4</sub>S: 326.0918; found: 326.0912.

**Potassium 2,9-dioxo-1,3-dipropyl-1,2,3,3a,4,10a-hexahydro-9H-imidazo[4,5-*e*][1,3]thiazino[2,3-*c*][1,2,4]triazine-7-carboxylate (3c).**  $^1\text{H}$  NMR (300 MHz, DMSO-*d*<sub>6</sub>):  $\delta$  0.71–0.86 (m, 6H, 2CH<sub>3</sub>), 1.29–1.53 (m, 4H, CH<sub>2</sub>), 2.70–2.82 (m, 1H, NCH<sub>2</sub>), 2.92–3.11 (m, 2H, NCH<sub>2</sub>), 3.23–3.30 (m, 1H, NCH<sub>2</sub>), 5.20 (d,  $J$  = 8.7 Hz, 1H, 3a-H), 6.28 (d,  $J$  = 8.7 Hz, 1H, 10a-H), 6.35 (s, 1H, =CH), 7.78 (s, 1H, 4-NH).  $^{13}\text{C}$  NMR (75 MHz, DMSO-*d*<sub>6</sub>):  $\delta$  10.96 (2CH<sub>3</sub>), 19.97, 20.80 (2CH<sub>2</sub>), 41.15, 42.26 (2NCH<sub>2</sub>), 65.11, 68.50 (C-3a, C-10a), 113.11 (=CH), 139.91 (C-7), 155.51, 157.11, 161.12, 162.87 (5a-C=N, 2-C=O, 9-C=O, COOK).

**Potassium 3-methyl-2,9-dioxo-1-phenyl-1,2,3,3a,4,10a-hexahydro-9H-imidazo[4,5-*e*][1,3]thiazino[2,3-*c*][1,2,4]triazine-7-carboxylate (3d).**  $^1\text{H}$  NMR (300 MHz, DMSO-*d*<sub>6</sub>):  $\delta$  2.71 (s, 3H, NCH<sub>3</sub>), 5.30 (d,  $J$  = 8.8 Hz, 1H, 3a-H), 6.04 (s, 1H, =CH), 6.88 (d,  $J$  = 8.8 Hz, 1H, 10a-H), 7.12–7.27 (m, 3H, Ph-2,4,6), 7.30 (t,  $J$  = 7.6 Hz, 2H, Ph-3,5), 7.95 (s, 1H, 4-NH).  $^{13}\text{C}$  NMR (150 MHz, DMSO-*d*<sub>6</sub>):  $\delta$  27.24 (NCH<sub>3</sub>), 65.84, 70.63 (C-3a, C-10a), 113.20 (=CH), 126.00 (Ph-4), 126.48, 128.38 (Ph-2,6, Ph-3,5), 136.40, 140.55 (Ph-1, C-7), 154.92, 155.78, 161.22, 161.72 (5a-C=N, 2-C=O, 9-C=O, COOK).

**Potassium 3-ethyl-2,9-dioxo-1-phenyl-1,2,3,3a,4,10a-hexahydro-9H-imidazo[4,5-*e*][1,3]thiazino[2,3-*c*][1,2,4]triazine-7-carboxylate (3e).** <sup>1</sup>H NMR (300 MHz, DMSO-*d*<sub>6</sub>): δ 1.05 (t, *J* = 7.1 Hz, 3H, CH<sub>3</sub>), 3.04–3.16 (m, 1H, NCH<sub>2</sub>), 3.19–3.23 (m, 1H, NCH<sub>2</sub>), 5.45 (d, *J* = 8.8 Hz, 1H, 3a-H), 6.05 (s, 1H, =CH), 6.88 (d, *J* = 8.8 Hz, 1H, 10a-H), 7.12–7.22 (m, 3H, Ph-2,6, Ph-4), 7.30 (t, *J* = 7.6 Hz, 2H, Ph-3,5), 7.91 (s, 1H, 4-NH). <sup>13</sup>C NMR (75 MHz, DMSO-*d*<sub>6</sub>): δ 12.16 (CH<sub>3</sub>), 34.16 (CH<sub>2</sub>), 65.81, 68.21 (C-3a, C-10a), 113.11 (=CH), 125.80 (Ph-4), 126.33, 128.23 (Ph-2,6, Ph-3,5), 136.38, 140.51 (Ph-1, C-7), 154.90, 155.17, 161.15, 161.67 (5a-C=N, 2-C=O, 9-C=O, COOK).

**Potassium 1,3-dimethyl-9-oxo-2-thioxo-1,2,3,3a,4,10a-hexahydro-9H-imidazo[4,5-*e*][1,3]thiazino[2,3-*c*][1,2,4]triazine-7-carboxylate (3f).** <sup>1</sup>H NMR (300 MHz, DMSO-*d*<sub>6</sub>): δ 2.90 (s, 6H, 2NCH<sub>3</sub>), 5.39 (d, *J* = 9.0 Hz, 1H, 3a-H), 6.39 (s, 1H, =CH), 6.49 (d, *J* = 9.0 Hz, 1H, 10a-H), 8.07 (s, 1H, 4-NH). <sup>13</sup>C NMR (75 MHz, DMSO-*d*<sub>6</sub>): δ 31.32 (NCH<sub>3</sub>), 32.72 (NCH<sub>3</sub>), 68.84 (C-10a), 73.76 (C-3a), 113.70 (C=H), 141.11 (C-7), 155.68 (5a-C=N), 161.79, 162.80 (9-C=O, COOK), 182.01 (2-C=S).

**Potassium 3-methyl-9-oxo-1-phenyl-2-thioxo-1,2,3,3a,4,10a-hexahydro-9H-imidazo[4,5-*e*][1,3]thiazino[2,3-*c*][1,2,4]triazine-7-carboxylate (3g).** <sup>1</sup>H NMR (300 MHz, DMSO-*d*<sub>6</sub>): δ 3.04 (s, 3H, NCH<sub>3</sub>), 5.65 (d, *J* = 9.5 Hz, 1H, 3a-H), 6.04 (s, 1H, =CH), 6.93 (d, *J* = 9.4 Hz, 1H, 10a-H), 7.16 (d, *J* = 7.0 Hz, 2H, Ph-2,6), 7.21–7.41 (m, 3H, Ph-3,5, Ph-4), 8.17 (s, 1H, 4-NH). <sup>13</sup>C NMR (75 MHz, DMSO-*d*<sub>6</sub>): δ 30.83 (CH<sub>3</sub>), 68.60, 74.38 (C-3a, C-10a), 112.96 (=CH), 127.54 (Ph-4), 128.50, 128.99 (Ph-2,6, Ph-3,5), 137.64, 141.34 (Ph-1, C-7), 154.85, 161.09 (5a-C=N, 9-C=O, COOK), 180.61 (2-C=S).

**Potassium 3-ethyl-9-oxo-1-phenyl-2-thioxo-1,2,3,3a,4,10a-hexahydro-9H-imidazo[4,5-*e*][1,3]thiazino[2,3-*c*][1,2,4]triazine-7-carboxylate (3h).** <sup>1</sup>H NMR (300 MHz, DMSO-*d*<sub>6</sub>): δ 1.11 (t, *J* = 7.2 Hz, 3H, CH<sub>3</sub>), 3.40–3.52 (m, 3H, NCH<sub>2</sub>), 3.71–3.79 (m, 1H, NCH<sub>2</sub>), 5.74 (dd, *J* = 9.5, 0.8 Hz, 1H, 3a-H), 6.00 (s, 1H, =CH), 6.89 (d, *J* = 9.5 Hz, 1H, 10a-H), 7.11–7.18 (m, 2H, Ph-2,6), 7.24–7.38 (m, 3H, Ph-3,5), 8.16 (s, 1H, 4-NH). <sup>13</sup>C NMR (75 MHz, DMSO-*d*<sub>6</sub>): δ 11.32 (CH<sub>3</sub>), 37.67 (CH<sub>2</sub>), 68.59, 72.36 (C-3a, C-10a), 112.89 (=CH), 127.47 (Ph-4), 128.43, 129.05 (Ph-2,6, Ph-3,5), 137.55, 141.46 (Ph-1, C-7), 155.00, 161.07 (5a-C=N, 9-C=O, COOK), 179.90 (2-C=S).

**Potassium 3-(2-hydroxyethyl)-9-oxo-1-phenyl-2-thioxo-2,3,3a,4,9,10a-hexahydro-1H-imidazo[4,5-*e*][1,3]thiazino[2,3-*c*][1,2,4]triazine-7-carboxylate (3i).** <sup>1</sup>H NMR (300 MHz, DMSO-*d*<sub>6</sub>): δ 3.53–3.67 (m, 4H, 2CH<sub>2</sub>), 5.80 (d, *J* = 9.5 Hz, 1H, 3a-H), 6.02 (s, 1H, =CH), 6.94 (d, *J* = 9.6 Hz, 1H, 10a-H), 7.15 (d, *J* = 7.0 Hz, 2H, Ph-2,6), 7.26–7.35 (m, 3H, Ph-3,5), 8.13 (s, 1H, 4-NH). <sup>13</sup>C NMR (75 MHz, DMSO-*d*<sub>6</sub>): δ 46.05 (NCH<sub>2</sub>), 58.69, 68.92, 74.48 (OCH<sub>2</sub>, C-3a, C-10a), 113.66 (=CH), 128.15 (Ph-4), 129.04, 129.54 (Ph-2,3,5,6), 137.91, 141.57 (Ph-1, C-7), 154.96, 161.56, 161.76 (5a-C=N, 9-C=O, COOK), 180.80 (2-C=S).

**Potassium 1-(4-chlorophenyl)-3-methyl-9-oxo-2-thioxo-2,3,3a,4,9,10a-hexahydro-1H-imidazo[4,5-*e*][1,3]thiazino[2,3-*c*][1,2,4]triazine-7-carboxylate (3j).** Yield 197 mg (44%); pale yellow solid; mp: 242–244 °C. IR (KBr): ν 3445, 3287 (NH), 3088 (=CH), 2928 (Alk), 1661, 1610 (C=O, C=N, C=C) cm<sup>-1</sup>. <sup>1</sup>H NMR (300 MHz, DMSO-*d*<sub>6</sub>): δ 3.02 (s, 3H, NCH<sub>3</sub>), 5.63 (d, *J* = 9.4 Hz, 1H, 9a-H), 6.06 (s, 1H, =CH), 6.90 (d, *J* = 9.3 Hz, 1H, 3a-H), 7.18 (d, *J* = 8.6 Hz, 2H, Ar), 7.41 (d, *J* = 8.6 Hz, 2H, Ar), 8.18 (s, 1H, NH). <sup>13</sup>C NMR (75

MHz, DMSO-*d*<sub>6</sub>):  $\delta$  31.37 (NCH<sub>3</sub>), 69.07, 74.68 (C-3a, C-9a), 113.63 (=CH), 129.12, 131.32, 132.55 (Ar-2-4), 137.16, 141.62 (Ar-1, C-7), 155.12, 161.73 (5a-C=N, 9-C=O, COOK), 180.94 (2-C=S). HRMS (ESI): *m/z* [*M* + *H*]<sup>+</sup> calcd for C<sub>15</sub>H<sub>12</sub>ClN<sub>5</sub>O<sub>3</sub>S<sub>2</sub>: 410.0143; found: 410.0151.

**Potassium 8-(2-methoxy-2-oxoethyl)-1,3-dimethyl-2,9-dioxo-1,2,3,3a,4,10a-hexahydro-9H-imidazo[4,5-*e*][1,3]thiazino[2,3-*c*][1,2,4]triazine-7-carboxylate (3k).** <sup>1</sup>H NMR (300 MHz, DMSO-*d*<sub>6</sub>):  $\delta$  2.58 (s, 6H, 2NCH<sub>3</sub>), 3.54 (s, 3H, OCH<sub>3</sub>), 4.08 (s, 2H, =C-CH<sub>2</sub>), 5.02 (d, *J* = 8.4 Hz, 1H, 3a-H), 6.16 (d, *J* = 8.4 Hz, 1H, 10a-H), 7.78 (s, 1H, 4-NH). <sup>13</sup>C NMR (75 MHz, DMSO-*d*<sub>6</sub>):  $\delta$  27.87 (NCH<sub>3</sub>), 28.88 (NCH<sub>3</sub>), 32.60 (=C-CH<sub>2</sub>), 51.72 (OCH<sub>3</sub>), 68.03 (C-10a), 70.33 (C-3a), 117.90 (C-8), 139.70 (C-7), 150.94 (5a-C=N), 158.20, 164.08, 172.03 (2-C=O, 9-C=O, COOK, COOMe).

**Potassium 8-(2-methoxy-2-oxoethyl)-3-methyl-2,9-dioxo-1-phenyl-1,2,3,3a,4,10a-hexahydro-9H-imidazo[4,5-*e*][1,3]thiazino[2,3-*c*][1,2,4]triazine-7-carboxylate (3l).** <sup>1</sup>H NMR (300 MHz, DMSO-*d*<sub>6</sub>):  $\delta$  2.69 (s, 3H, NCH<sub>3</sub>), 3.42 (s, 3H, OCH<sub>3</sub>), 3.48 (d, *J* = 16.6 Hz, 1H, =C-CH<sub>2</sub>), 4.22 (d, *J* = 16.5 Hz, 1H, =C-CH<sub>2</sub>), 5.29 (d, *J* = 8.7 Hz, 1H, 3a-H), 6.81 (d, *J* = 8.7 Hz, 1H, 10a-H), 7.10-7.23 (m, 3H, Ph-3-5), 7.27 (d, *J* = 7.8 Hz, 2H, Ph-2,6), 7.92 (s, 1H, 4-NH). <sup>13</sup>C NMR (75 MHz, DMSO-*d*<sub>6</sub>):  $\delta$  27.69 (NCH<sub>3</sub>), 32.37 (=C-CH<sub>2</sub>), 51.65 (OCH<sub>3</sub>), 67.26, 70.85 (C-3a, C-10a), 117.96 (C-8), 126.29 (Ph-4), 126.81, 128.74 (Ph-2,6, Ph-3,5), 137.03, 140.42 (C-7, Ph-1), 150.68 (5a-C=N), 156.34, 163.13, 171.67 (2-C=O, 9-C=O, COOK, COOMe).

**Potassium 8-(2-methoxy-2-oxoethyl)-3-methyl-9-oxo-1-phenyl-2-thioxo-1,2,3,3a,4,10a-hexahydro-9H-imidazo[4,5-*e*][1,3]thiazino[2,3-*c*][1,2,4]triazine-7-carboxylate (3m).** <sup>1</sup>H NMR (300 MHz, DMSO-*d*<sub>6</sub>):  $\delta$  3.02 (s, 3H, NCH<sub>3</sub>), 3.32 (d, *J* = 16.5 Hz, 1H, =C-CH<sub>2</sub>), 3.42 (s, 3H, OCH<sub>3</sub>), 4.26 (d, *J* = 16.5 Hz, 1H, =C-CH<sub>2</sub>), 5.63 (d, *J* = 9.4 Hz, 1H, 3a-H), 6.83 (d, *J* = 9.4 Hz, 1H, 10a-H), 7.14 (d, *J* = 6.7 Hz, 2H, Ph-2,6), 7.23-7.32 (m, 3H, Ph-3-5), 8.15 (s, 1H, 4-NH). <sup>13</sup>C NMR (75 MHz, DMSO-*d*<sub>6</sub>):  $\delta$  31.34 (NCH<sub>3</sub>), 32.24 (=C-CH<sub>2</sub>), 51.68 (OCH<sub>3</sub>), 70.10, 74.59 (C-3a, C-10a), 118.06 (C-8), 127.99 (Ph-4), 129.01, 129.52 (Ph-2,6, Ph-3,5), 138.27, 141.35 (C-7, Ph-1), 150.50 (5a-C=N), 162.58, 163.03, 171.67 (9-C=O, COOK, COOMe), 181.20 (2-C=S).

#### General procedure for the synthesis of (imidazo[4,5-*e*]thiazolo[2,3-*c*][1,2,4]triazin-6-ylidene)acetic acids 4a,b

To a stirring suspension of imidazo[4,5-*e*]thiazolo[2,3-*c*][1,2,4]triazines **1a,b** (1 mmol) in 10 mL of H<sub>2</sub>O, 0.150 mL KOH (1.5 mmol, 40% aq. solution) was added. The mixture was stirred at reflux for 30 min. After that, 0.150 mL of conc. HCl was added. The first precipitates of acids **4a,b** were filtered off, washed with water, and dried. After standing, precipitates of compounds **5a,b** were filtered off, washed with water, and dried.

**(Z)-2-(1,3-Dimethyl-2,8-dioxo-1,2,3,3a,4,9a-hexahydroimidazo[4,5-*e*]thiazolo[2,3-*c*][1,2,4]triazin-7(8H)-ylidene)acetic acid (4a).** Yield 50 mg (17%); yellow solid; mp: 237–238 °C. IR (KBr):  $\nu$  3339 (NH), 3044 (=CH), 2940 (Alk), 2672, 2558 (COOH), 1707, 1678, 1649 (C=O, C=N, C=C) cm<sup>-1</sup>. <sup>1</sup>H NMR (600 MHz, DMSO-*d*<sub>6</sub>):  $\delta$  2.62 (s, 3H, NCH<sub>3</sub>), 2.85 (s, 3H, NCH<sub>3</sub>), 4.78 (d, *J* = 6.1 Hz, 1H, 3a-H), 5.62 (d, *J* = 6.0 Hz, 1H, 9a-H), 6.68 (s, 1H, =CH), 7.96 (s, 1H, 4-NH). <sup>13</sup>C NMR (150 MHz, DMSO-*d*<sub>6</sub>):  $\delta$  27.88 (3-NCH<sub>3</sub>), 31.29 (1-NCH<sub>3</sub>), 63.93 (C-3a), 65.98 (C-9a), 114.65 (=CH), 135.77 (5a-C=N), 141.35 (C-7),



158.98 (2-C=O), 162.96 (8-C=O), 166.85 (COOH). HRMS (ESI):  $m/z$  [ $M + H$ ]<sup>+</sup> calcd for C<sub>10</sub>H<sub>11</sub>N<sub>5</sub>O<sub>4</sub>S: 298.0605; found: 298.0613.

**(Z)-2-(1,3-Diethyl-2,8-dioxo-1,2,3,3a,4,9a-hexahydroimidazo[4,5-*e*]thiazolo[2,3-*c*][1,2,4]triazin-7(8*H*)-ylidene)acetic acid (4b).** Yield 123 mg (38%); yellow solid; mp: 275–276 °C. IR (KBr):  $\nu$  3288 (NH), 3105 (COOH), 3069 (=CH), 2997, 2947 (Alk), 2612 (COOH), 1716, 1690, 1647 (C=O, C=N, C=C) cm<sup>-1</sup>. <sup>1</sup>H NMR (300 MHz, DMSO-*d*<sub>6</sub>):  $\delta$  1.01 (t,  $J$  = 7.1 Hz, 3H, CH<sub>3</sub>), 1.07 (t,  $J$  = 7.0 Hz, 3H, CH<sub>3</sub>), 3.03–3.31 (m, 3H, NCH<sub>2</sub>), 3.38–3.48 (m, 1H, NCH<sub>2</sub>), 4.85 (d,  $J$  = 5.9 Hz, 1H, 3a-H), 5.69 (d,  $J$  = 5.9 Hz, 1H, 9a-H), 6.70 (s, 1H, =CH), 7.95 (s, 1H, 4-NH). <sup>13</sup>C NMR (75 MHz, DMSO-*d*<sub>6</sub>):  $\delta$  12.72, 12.96 (2CH<sub>3</sub>), 34.90, 37.79 (2CH<sub>2</sub>), 61.53 (C-3a), 63.66 (C-9a), 114.80 (=CH), 135.48 (5a-C=N), 141.25 (C-7), 157.92 (2-C=O), 162.98 (8-C=O), 166.89 (COOH). HRMS (ESI):  $m/z$  [ $M + H$ ]<sup>+</sup> calcd for C<sub>12</sub>H<sub>15</sub>N<sub>5</sub>O<sub>4</sub>S: 326.0918; found: 326.0910.

### General procedure for the synthesis of imidazo[4,5-*e*][1,3]thiazino[2,3-*c*][1,2,4]triazine-7-carboxylic acids 5a–k,m

For **5a,b,j**: To a solution of potassium salts **3a,b,j** (1 mmol) in water (10 mL), conc. HCl was added (to pH 2–3). After standing at room temperature for 2 h, the precipitate of compounds **5a,b,j** was filtered off, washed with water, and dried.

For **5c–i**: To a stirring suspension of imidazo[4,5-*e*]thiazolo[2,3-*c*][1,2,4]triazines **1c–i** (1 mmol) in MeOH (7 mL), 0.250 mL of KOH (2.5 mmol, 40% aq. solution) was added and the mixture was stirred at room temperature for 4 h. Then, 0.360 mL of conc. HCl was added and the reaction mixture was evaporated under reduced pressure to 1/3 of the volume. After standing at room temperature for 2 h, the precipitate of compounds **5c–i** was filtered off, washed with water, and dried.

For **5k,m**: To a stirring suspension of imidazo[4,5-*e*]thiazolo[2,3-*c*][1,2,4]triazines **8a,c** (1 mmol) in MeOH (10 mL), KOH (40% aq. solution) was added (0.250 mL, 2.5 mmol for **3k** or 0.350 mL, 3.5 mmol for **3m**). The reaction mixtures were evaporated at reduced pressure. To the residual solid, H<sub>2</sub>O (3 mL) was added and the orange solution was acidified by 2N HCl to pH 4. The water was co-evaporated under reduced pressure with 3-fold excess (9 mL) MeOH at 25 °C. The residual solid was dissolved in 5 mL MeOH, the inorganic precipitate was decanted and the methanolic solution was evaporated. The solid residue of **5k,m** was dried.

**1,3-Dimethyl-2,9-dioxo-1,2,3,3a,4,10a-hexahydro-9*H*-imidazo[4,5-*e*][1,3]thiazino[2,3-*c*][1,2,4]triazine-7-carboxylic acid (5a).** Yield 285 mg (96%); orange solid; mp: 112–114 °C. IR (KBr):  $\nu$  3300 (NH), 3046 (=CH), 3000, 2973, 2938, 2906 (Alk), 2758, 2570 (COOH) 1733, 1714, 1628, 1568 (C=O, C=N, C=C) cm<sup>-1</sup>. <sup>1</sup>H NMR (300 MHz, DMSO-*d*<sub>6</sub>):  $\delta$  2.58 (s, 3H, CH<sub>3</sub>), 2.62 (s, 3H, CH<sub>3</sub>), 5.06 (d,  $J$  = 8.3 Hz, 1H, 3a-H), 6.23 (d,  $J$  = 8.2 Hz, 1H, 10a-H), 6.68 (s, 1H, =CH), 8.11 (s, 1H, 4-NH). <sup>13</sup>C NMR (75 MHz, DMSO-*d*<sub>6</sub>):  $\delta$  27.52, 28.57 (2CH<sub>3</sub>), 67.64, 69.82 (C-3a, C-10a), 119.64 (=CH), 135.73, 142.81 (C-7, 5a-C=N), 157.63, 160.98, 162.75 (2-C=O, 9-C=O, COOH). HRMS (ESI):  $m/z$  [ $M + H$ ]<sup>+</sup> calcd for C<sub>10</sub>H<sub>11</sub>N<sub>5</sub>O<sub>4</sub>S: 298.0605; found: 298.0609.

**1,3-Ethyl-2,9-dioxo-1,2,3,3a,4,10a-hexahydro-9H-imidazo[4,5-e][1,3]thiazino[2,3-c][1,2,4]triazine-7-carboxylic acid (5b).** Yield 305 mg (94%); yellow solid; mp: 203–204 °C. IR (KBr):  $\nu$  3346 (NH), 3077 (=CH), 2975, 2930, 2871 (Alk), 2703, 2549 (COOH) 1706, 1665, 1617, 1590 (C=O, C=N, C=C)  $\text{cm}^{-1}$ .  $^1\text{H}$  NMR (300 MHz, DMSO- $d_6$ ):  $\delta$  0.89–1.04 (m, 6H, 2CH<sub>3</sub>), 2.82–2.91 (m, 1H, NCH<sub>2</sub>), 2.93–3.08 (m, 1H, NCH<sub>2</sub>), 3.12–3.22 (m, 1H, NCH<sub>2</sub>), 3.25–3.37 (m, 1H, NCH<sub>2</sub>), 5.22 (d,  $J$  = 8.5 Hz, 1H, 3a-H), 6.31 (d,  $J$  = 8.5 Hz, 1H, 10a-H), 6.68 (s, 1H, =CH), 8.10 (s, 1H, 4-NH).  $^{13}\text{C}$  NMR (125 MHz, DMSO- $d_6$ ):  $\delta$  12.18, 13.48 (2CH<sub>3</sub>), 34.33, 35.64 (2CH<sub>2</sub>), 66.06, 67.81 (C-3a, C-10a), 119.65 (=CH), 135.79, 143.14 (C-7, 5a-C=N), 156.50, 161.07, 162.76 (2-C=O, 9-C=O, COOH). HRMS (ESI):  $m/z$  [ $M$  + H]<sup>+</sup> calcd for C<sub>12</sub>H<sub>15</sub>N<sub>5</sub>O<sub>4</sub>S: 348.0737; found: 348.0737.

**2,9-Dioxo-1,3-dipropyl-1,2,3,3a,4,10a-hexahydro-9H-imidazo[4,5-e][1,3]thiazino[2,3-c][1,2,4]triazine-7-carboxylic acid (5c).** Yield 248 mg (70%); yellow solid; mp: 198–199 °C. IR (KBr):  $\nu$  3291 (NH), 3079 (=CH), 2967, 2935, 2877 (Alk), 2585 (COOH) 1722, 1679, 1616 (C=O, C=N, C=C)  $\text{cm}^{-1}$ .  $^1\text{H}$  NMR (300 MHz, DMSO- $d_6$ ):  $\delta$  0.71–0.88 (m, 6H, 2CH<sub>3</sub>), 1.30–1.59 (m, 4H, 2CH<sub>2</sub>), 2.73–2.87 (m, 1H, NCH<sub>2</sub>), 2.96–3.12 (m, 2H, NCH<sub>2</sub>), 3.19–3.31 (m, 1H, NCH<sub>2</sub>), 5.24 (d,  $J$  = 8.5 Hz, 1H, 3a-H), 6.31 (d,  $J$  = 8.5 Hz, 1H, 10a-H), 6.69 (s, 1H, =CH), 8.13 (s, 1H, 4-NH).  $^{13}\text{C}$  NMR (75 MHz, DMSO- $d_6$ ):  $\delta$  10.97 (2CH<sub>3</sub>), 19.98, 20.79 (2CH<sub>3</sub>), 41.30, 42.29 (2CH<sub>2</sub>), 66.09, 68.26 (C-3a, C-10a), 119.56 (=CH), 135.72, 143.16 (C-7, 5a-C=N), 157.04, 161.03, 162.70 (2-C=O, 9-C=O, COOH). HRMS (ESI):  $m/z$  [ $M$  + H]<sup>+</sup> calcd for C<sub>14</sub>H<sub>19</sub>N<sub>5</sub>O<sub>4</sub>S: 354.1231; found: 354.1233.

**3-Methyl-2,9-dioxo-1-phenyl-1,2,3,3a,4,10a-hexahydro-9H-imidazo[4,5-e][1,3]thiazino[2,3-c][1,2,4]triazine-7-carboxylic acid (5d).** Yield 208 mg (58%); yellow solid; mp: 224–225 °C. IR (KBr):  $\nu$  3263 (NH), 3072 (=CH, Ph), 2997, 2917 (Alk), 2724, 2550 (COOH), 1728, 1702, 1679, 1618 (C=O, C=N, C=C)  $\text{cm}^{-1}$ .  $^1\text{H}$  NMR (300 MHz, DMSO- $d_6$ ) 2.71 (s, 3H, NCH<sub>3</sub>), 5.34 (d,  $J$  = 8.6 Hz, 1H, 3a-H), 6.40 (s, 1H, =CH), 6.91 (d,  $J$  = 8.6 Hz, 1H, 10a-H), 7.14–7.26 (m, 3H, Ph-2,4,6), 7.29–7.36 (m, 2H, Ph-3,5), 8.27 (s, 1H, 4-NH).  $^{13}\text{C}$  NMR (75 MHz, DMSO- $d_6$ ) 27.27 (CH<sub>3</sub>), 66.71, 70.27 (C-3a, C-10a), 119.34 (=CH), 126.16 (Ph-4), 126.40 (Ph-2,6), 128.13 (Ph-1), 128.44 (Ph-3,5), 136.17, 142.72 (C-7, 5a-C=N), 155.61, 159.78, 162.61 (2-C=O, 9-C=O, COOH). HRMS (ESI):  $m/z$  [ $M$  + H]<sup>+</sup> calcd for C<sub>15</sub>H<sub>13</sub>N<sub>5</sub>O<sub>4</sub>S: 360.0761; found: 360.0755.

**3-Ethyl-2,9-dioxo-1-phenyl-1,2,3,3a,4,10a-hexahydro-9H-imidazo[4,5-e][1,3]thiazino[2,3-c][1,2,4]triazine-7-carboxylic acid (5e).** Yield 295 mg (79%); yellow solid; mp: 225–226 °C. IR (KBr):  $\nu$  3299 (NH), 3052 (=CH, Ph), 2979, 2934, 2874 (Alk), 2752, 2568 (COOH), 1698, 1656, 1620, 1593 (C=O, C=N, C=C)  $\text{cm}^{-1}$ .  $^1\text{H}$  NMR (300 MHz, DMSO- $d_6$ ):  $\delta$  1.05 (t,  $J$  = 7.1 Hz, 3H, CH<sub>3</sub>), 3.10–3.21 (m, 1H, NCH<sub>2</sub>), 3.28–3.38 (m, 1H, NCH<sub>2</sub>), 5.49 (d,  $J$  = 8.6 Hz, 1H, 3a-H), 6.41 (s, 1H, =CH), 6.92 (d,  $J$  = 8.6 Hz, 1H, 10a-H), 7.16–7.28 (m, 3H, Ph-2,4,6), 7.33 (t,  $J$  = 7.6 Hz, 2H, Ph-3,5), 8.27 (s, 1H, 4-NH).  $^{13}\text{C}$  NMR (75 MHz, DMSO- $d_6$ ):  $\delta$  12.19 (CH<sub>3</sub>), 34.36 (CH<sub>2</sub>), 66.87, 67.96 (C-3a, C-10a), 119.45 (=CH), 126.15 (Ph-4), 126.43 (Ph-2,6), 128.47 (Ph-3,5), 136.20, 136.27 142.72 (Ph-1, C-7, 5a-C=N), 155.10, 159.83, 162.70 (2-C=O, 9-C=O, COOH). HRMS (ESI):  $m/z$  [ $M$  + H]<sup>+</sup> calcd for C<sub>16</sub>H<sub>15</sub>N<sub>5</sub>O<sub>4</sub>S: 374.0918; found: 374.0917.

**1,3-Dimethyl-9-oxo-2-thioxo-1,2,3,3a,4,10a-hexahydro-9H-imidazo[4,5-e][1,3]thiazino[2,3-c][1,2,4]triazine-7-carboxylic acid (5f).** Yield 222 mg (72%); yellow solid, mp: 168–169 °C. IR (KBr):  $\nu$  3326 (NH), 3066 (=CH), 2926 (Alk), 2572 (COOH) 1718, 1670, 1616 (C=O, C=N, C=C), 1300 (2-C=S)  $\text{cm}^{-1}$ .  $^1\text{H}$  NMR (300 MHz, DMSO- $d_6$ ):  $\delta$  2.91 (s, 3H, NCH<sub>3</sub>), 2.93 (s, 3H, NCH<sub>3</sub>), 5.42 (d,  $J$  = 8.9 Hz, 1H, 3a-H), 6.51 (d,  $J$  = 8.9 Hz, 1H, 10a-H), 6.67 (s, 1H, =CH), 8.32 (s, 1H, 4-NH).  $^{13}\text{C}$  NMR (75 MHz, DMSO- $d_6$ ):  $\delta$  31.39 (NCH<sub>3</sub>), 32.86 (NCH<sub>3</sub>), 69.56, 73.51 (C-3a, C-10a), 119.22 (=CH), 137.63 (C-7), 145.01 (5a-C=N), 161.21, 162.83 (9-C=O, COOH), 182.22 (2-C=S). HRMS (ESI):  $m/z$  [ $M + \text{H}$ ]<sup>+</sup> calcd for C<sub>10</sub>H<sub>11</sub>N<sub>5</sub>O<sub>3</sub>S<sub>2</sub>: 314.0376; found: 314.0390.

**3-Methyl-9-oxo-1-phenyl-2-thioxo-1,2,3,3a,4,10a-hexahydro-9H-imidazo[4,5-e][1,3]thiazino[2,3-c][1,2,4]triazine-7-carboxylic acid (5g).** Yield 311 mg (83%); yellow solid; mp: 203–204 °C. IR (KBr):  $\nu$  3296 (NH), 3067, 3008 (=CH, Ph), 2925, 2839 (Alk), 1663, 1640, 1616 (C=O, C=N, C=C), 1302 (C=S)  $\text{cm}^{-1}$ .  $^1\text{H}$  NMR (300 MHz, DMSO- $d_6$ ):  $\delta$  3.05 (s, 3H, NCH<sub>3</sub>), 5.70 (d,  $J$  = 9.4 Hz, 1H, 3a-H), 6.38 (s, 1H, =CH), 6.97 (d,  $J$  = 9.3 Hz, 1H, 10a-H), 7.21 (d,  $J$  = 7.2 Hz, 2H, Ph-2,6), 7.28–7.45 (m, 3H, Ph-3-5), 8.51 (s, 1H, 4-NH).  $^{13}\text{C}$  NMR (75 MHz, DMSO- $d_6$ ):  $\delta$  30.97 (CH<sub>3</sub>), 69.39, 74.14 (C-3a, C-10a), 119.23 (=CH), 127.81 (Ph-4), 128.77, 129.00 (Ph-2,6, Ph-3,5), 137.11, 137.45 142.71 (Ph-1, C-7, 5a-C=N), 159.25, 162.64 (9-C=O, COOH), 180.74 (2-C=S). HRMS (ESI):  $m/z$  [ $M + \text{H}$ ]<sup>+</sup> calcd for C<sub>15</sub>H<sub>13</sub>N<sub>5</sub>O<sub>3</sub>S<sub>2</sub>: 376.0533; found: 376.0518.

**3-Ethyl-9-oxo-1-phenyl-2-thioxo-1,2,3,3a,4,10a-hexahydro-9H-imidazo[4,5-e][1,3]thiazino[2,3-c][1,2,4]triazine-7-carboxylic acid (5h).** Yield 346 mg (89%); yellow solid; mp: 202–203 °C. IR (KBr):  $\nu$  3304 (NH), 3062 (=CH, Ph), 2975, 2932, 2873 (Alk), 2580 (COOH), 1687, 1658, 1615, 1591 (C=O, C=N, C=C), 1265 (C=S)  $\text{cm}^{-1}$ .  $^1\text{H}$  NMR (300 MHz, DMSO- $d_6$ ):  $\delta$  1.12 (t,  $J$  = 7.0 Hz, 3H, CH<sub>3</sub>), 3.42–3.54 (m, 1H, NCH<sub>2</sub>), 3.70–3.81 (m, 1H, NCH<sub>2</sub>), 5.79 (d,  $J$  = 9.4 Hz, 1H, 3a-H), 6.37 (s, 1H, =CH), 6.93 (d,  $J$  = 9.3 Hz, 1H, 10a-H), 7.17–7.23 (m, 2H, Ph-2,6), 7.24–7.40 (m, 3H, Ph-3-5), 8.48 (s, 1H, 4-NH).  $^{13}\text{C}$  NMR (75 MHz, DMSO- $d_6$ ):  $\delta$  11.34 (CH<sub>3</sub>), 37.85 (CH<sub>2</sub>), 69.40, 72.14 (C-3a, C-10a), 118.97 (=CH), 127.72 (Ph-4), 128.29 (Ph-4), 128.68, 129.03 (Ph-2,6, Ph-3,5), 137.39, 143.19 (C-7, 5a-C=N), 159.28, 162.54 (9-C=O, COOH), 180.03 (2-C=S). HRMS (ESI):  $m/z$  [ $M + \text{H}$ ]<sup>+</sup> calcd for C<sub>16</sub>H<sub>15</sub>N<sub>5</sub>O<sub>3</sub>S<sub>2</sub>: 390.0689; found: 390.0687.

**3-(2-Hydroxyethyl)-9-oxo-1-phenyl-2-thioxo-2,3,3a,4,9,10a-hexahydro-1H-imidazo[4,5-e][1,3]thiazino[2,3-c][1,2,4]triazine-7-carboxylic acid (5i).** Yield 190 mg (47%); yellow solid; mp: 181–183 °C. IR (KBr):  $\nu$  3540, 3289 (NH, OH), 3074, 3062 (=CH, Ph), 2933, 2879 (Alk), 1704, 1682, 1642, 1612 (C=O, C=N, C=C)  $\text{cm}^{-1}$ .  $^1\text{H}$  NMR (300 MHz, DMSO- $d_6$ ):  $\delta$  3.57–3.82 (m, 4H, 2CH<sub>2</sub>), 5.84 (d,  $J$  = 9.5 Hz, 1H, 3a-H), 6.36 (s, 1H, =CH), 6.98 (d,  $J$  = 9.4 Hz, 1H, 10a-H), 7.20 (d,  $J$  = 7.2 Hz, 2H, Ph-2,6), 7.26–7.38 (m, 3H, Ph-3-5), 8.43 (s, 1H, 4-NH).  $^{13}\text{C}$  NMR (75 MHz, DMSO- $d_6$ ):  $\delta$  46.06 (NCH<sub>2</sub>), 58.62, 69.60, 74.21 69.40, 72.14 (CH<sub>2</sub>, C-3a, C-10a), 119.61 (=CH), 128.32 (Ph-4), 129.21, 129.49 (Ph-2,3,5,6), 137.40, 137.74, 143.24 (5a-C=N, C-7, Ph-1), 159.75, 162.93 (9-C=O, COOH), 180.91 (2-C=S). HRMS (ESI):  $m/z$  [ $M + \text{H}$ ]<sup>+</sup> calcd for C<sub>16</sub>H<sub>15</sub>N<sub>5</sub>O<sub>4</sub>S<sub>2</sub>: 406.0639; found: 406.0646.

**1-(4-Chlorophenyl)-3-methyl-9-oxo-2-thioxo-2,3,3a,4,9,10a-hexahydro-1H-imidazo[4,5-e][1,3]thiazino[2,3-c][1,2,4]triazine-7-carboxylic acid (5j).** Yield 307 mg (75%); yellow solid; mp: 212–214 °C. IR (KBr):  $\nu$  3507, 3351 (NH), 3073 (=CH, Ph), 2927 (Alk), 1719, 1682, 1615 (C=O, C=N, C=C)  $\text{cm}^{-1}$ .  $^1\text{H}$  NMR (300 MHz, DMSO- $d_6$ ):  $\delta$  3.03

(s, 3H, NCH<sub>3</sub>), 5.68 (d, *J* = 9.2 Hz, 1H, 3a-H), 6.43 (s, 1H, =CH), 6.94 (d, *J* = 9.2 Hz, 1H, 10a-H), 7.23 (d, *J* = 8.6 Hz, 2H, Ar), 7.44 (d, *J* = 8.5 Hz, 2H, Ar), 8.49 (s, 1H, 4-NH). <sup>13</sup>C NMR (75 MHz, DMSO-*d*<sub>6</sub>): δ 31.44 (CH<sub>3</sub>), 69.76, 74.39 (C-3a, C-10a), 119.77 (=CH), 129.31, 131.30, 132.72 (Ar-2-6), 137.01, 137.51, 143.13 (Ph-1, C-7, 5a-C=N), 159.92, 162.93 (9-C=O, COOH), 181.11 (2-C=S). HRMS (ESI): *m/z* [*M* + H]<sup>+</sup> calcd for C<sub>15</sub>H<sub>12</sub>Cl<sub>5</sub>O<sub>3</sub>S<sub>2</sub>: 410.0143 found: 410.0151.

**8-(2-Methoxy-2-oxoethyl)-1,3-dimethyl-2,9-dioxo-1,2,3,3a,4,10a-hexahydro-9H-imidazo[4,5-*e*][1,3]thiazino[2,3-*c*][1,2,4]triazine-7-carboxylic acid (5k).** Yield 332 mg (90%); yellow solid; mp: 170–171 °C. IR (KBr): ν 3328 (NH), 2954 (Alk), 2540 (COOH) 1707, 1665, 1616 (C=O, C=N, C=C) cm<sup>-1</sup>. <sup>1</sup>H NMR (300 MHz, DMSO-*d*<sub>6</sub>): δ 2.59 (s, 3H, NCH<sub>3</sub>), 2.61 (s, 3H, NCH<sub>3</sub>), 3.59 (s, 3H, OCH<sub>3</sub>), 3.83 (d, *J* = 16.9 Hz, 1H, CH<sub>2</sub>), 3.95 (d, *J* = 17.1 Hz, 1H, CH<sub>2</sub>), 5.07 (d, *J* = 8.3 Hz, 1H, 3a-H), 6.21 (d, *J* = 8.3 Hz, 1H, 10a-H), 8.10 (s, 1H, 4-NH). <sup>13</sup>C NMR (75 MHz, DMSO-*d*<sub>6</sub>): δ 27.97 (NCH<sub>3</sub>), 29.03 (NCH<sub>3</sub>), 33.68 (CH<sub>2</sub>), 52.22 (OCH<sub>3</sub>), 69.13 (C-10a), 70.19 (C-3a), 124.56 (C-8), 135.97 (5a-C=N), 140.58 (C-7), 158.11 (2-C=O), 162.61 (9-C=O), 163.80 (COOH), 170.84 (COOMe). HRMS (ESI): *m/z* [*M* + Na]<sup>+</sup> calcd for C<sub>13</sub>H<sub>14</sub>N<sub>5</sub>NaO<sub>6</sub>S: 392.0635; found: 392.0649.

**8-(2-Methoxy-2-oxoethyl)-3-methyl-9-oxo-1-phenyl-2-thioxo-1,2,3,3a,4,10a-hexahydro-9H-imidazo[4,5-*e*][1,3]thiazino[2,3-*c*][1,2,4]triazine-7-carboxylic acid (5m).** Yield 237 mg (53%); yellow solid; mp: 154–155 °C. IR (KBr): ν 3326 (NH), 3062, 3037 (Ph), 2951, 2931 (Alk), 2556 (COOH) 1726, 1673, 1613 (C=O, C=N, C=C), 1303 (2-C=S) cm<sup>-1</sup>. <sup>1</sup>H NMR (300 MHz, DMSO-*d*<sub>6</sub>): δ 3.03 (s, 3H, NCH<sub>3</sub>), 3.41–3.58 (m, 4H, OCH<sub>3</sub>, =C-CH<sub>2</sub>), 3.67 (d, *J* = 17.0 Hz, 1H, =C-CH<sub>2</sub>), 5.69 (d, *J* = 9.4 Hz, 1H, 3a-H), 6.90 (d, *J* = 9.2 Hz, 1H, 10a-H), 7.18 (d, *J* = 7.5 Hz, 2H, Ph-2,6), 7.25–7.37 (m, 3H, Ph-3-5), 8.47 (s, 1H, 4-NH). <sup>13</sup>C NMR (75 MHz, DMSO-*d*<sub>6</sub>): δ 31.43 (NCH<sub>3</sub>), 33.40 (=C-CH<sub>2</sub>), 52.18 (OCH<sub>3</sub>), 70.88, 74.39 (C-3a, C-10a), 124.60 (C-8), 128.10 (Ph-4), 129.17, 129.40 (Ph-2,6, Ph-3,5), 137.21, 138.07 (C-7, Ph-1), 161.01, 163.79, 170.24 (5a-C=N, 9-C=O, COOH, COOMe), 181.34 (2-C=S). HRMS (ESI): *m/z* [*M* + H]<sup>+</sup> calcd for C<sub>18</sub>H<sub>17</sub>N<sub>5</sub>O<sub>5</sub>S<sub>2</sub>: 448.0744; found: 448.0743.

#### Procedure for the synthesis imidazo[4,5-*e*][1,2,4]triazines 7i,j

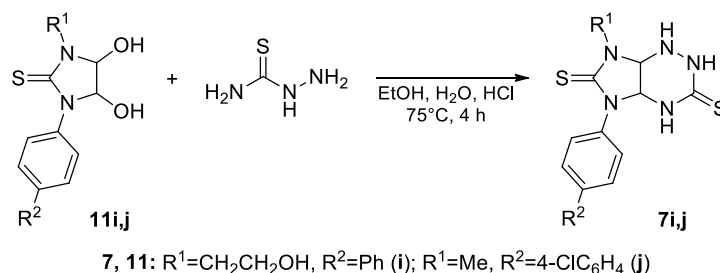

To a stirred suspension of **11i,j** (10 mmol) and thiosemicarbazide (0.91 g, 10 mmol) in a mixture of EtOH (10 mL) and H<sub>2</sub>O (1 mL) at 75 °C, conc. HCl (0.4 mL) was added. The mixture was stirred for 4 h and cooled. The precipitate of compounds **7i,j** was filtered off, washed with MeCN, followed by MeOH, and dried.

**7-(2-Hydroxyethyl)-5-phenyltetrahydro-1H-imidazo[4,5-*e*][1,2,4]triazine-3,6(2H,4H)-dithione (7i).** Yield 1.550 g (50%); white solid; mp: 231–233 °C. <sup>1</sup>H NMR (300 MHz, DMSO-*d*<sub>6</sub>): δ 3.35–3.79 (m, 4H, CH<sub>2</sub>), 5.37 (d, *J* = 7.3 Hz, 1H, CH), 5.46 (d, *J* = 7.3 Hz, 1H, CH), 5.97 (d, *J* = 7.3 Hz, 1H, 1-NH), 7.28–7.44 (m, 6H, Ph, OH), 8.69 (s, 1H, 4-NH), 9.65 (s, 1H, 2-NH). <sup>13</sup>C

NMR (75 MHz, DMSO-*d*<sub>6</sub>):  $\delta$  45.82 (NCH<sub>2</sub>), 58.24 (OCH<sub>2</sub>), 66.69, 73.30 (C-4a, C-7a), 127.42 (Ph-4), 128.71, 129.18 (Ph-2,3,5,6), 138.08 (Ph-1), 181.12, 186.51 (2C=S). HRMS (ESI): *m/z* [*M* + *H*]<sup>+</sup> calcd for C<sub>12</sub>H<sub>15</sub>N<sub>5</sub>OS<sub>2</sub>: 310.0791; found: 310.0790.

**5-(4-Chlorophenyl)-7-methyltetrahydro-1H-imidazo[4,5-*e*][1,2,4]triazine-3,6(2H,4H)-dithione (7j).** Yield 1.774 g (57%); light beige solid; mp: 234–236 °C. IR (KBr):  $\nu$  3202 (NH), 2944 (Alk), 1498 (C=S) cm<sup>-1</sup>. <sup>1</sup>H NMR (300 MHz, DMSO-*d*<sub>6</sub>):  $\delta$  3.06 (s, 3H, CH<sub>3</sub>), 5.33–5.42 (m, 2H, 4a-H, 7a-H), 7.32 (d, *J* = 8.5 Hz, 2H, Ar), 7.50 (d, *J* = 8.5 Hz, 2H, Ar), 8.77 (s, 1H, 4-NH), 9.69 (s, 1H, 2-NH). <sup>13</sup>C NMR (75 MHz, DMSO-*d*<sub>6</sub>):  $\delta$  31.22 (NCH<sub>3</sub>), 66.61, 73.76 (C-4a, C-7a), 128.71, 130.95, 131.84 (Ar-2-6), 137.05 (Ar-1), 180.98, 186.18 (2C=S). HRMS (ESI): *m/z* [*M* + *H*]<sup>+</sup> calcd for C<sub>11</sub>H<sub>12</sub>ClN<sub>5</sub>S<sub>2</sub>: 314.0295; found: 314.0294.

### Procedure for the synthesis of compounds 9k,l

To a stirring suspension of imidazo[4,5-*e*]thiazolo[2,3-*c*][1,2,4]triazines **8a,b** (1 mmol) in MeOH (10 mL), 40% aq. solution KOH (0.250 mL (2.5 mmol) for **9k** or 0.350 mL (3.5 mmol) for **9l**) was added and the mixture was stirred at room temperature (1 h for **9k** or 24 h for **9l**). Then, the reaction mixtures were acidified by the addition of 0.200 mL of conc. HCl. The solvent was evaporated at reduced pressure at 40 °C. To the residual solid, H<sub>2</sub>O (10 mL) was added. The resulting mixture was stirred and the precipitate formed was filtered off, washed with 10 mL of water and dried.

**(Z)-2-(((E)-1,3-dimethyl-2-oxoimidazolidin-4-ylidene)hydrazineylidene)-5-(2-methoxy-2-oxoethyl)-4-oxo-3,4-dihydro-2H-1,3-thiazine-6-carboxylic acid (9k).** Yield 185 mg (50%); yellow solid; mp: 199–200 °C. IR (KBr):  $\nu$  3139 (NH), 2988, 2950 (Alk), 2850 (C-S), 2568 (COOH) 1731, 1643 (C=N, C=O, NH-C=O), 1586 (C=C-S) cm<sup>-1</sup>. <sup>1</sup>H NMR (300 MHz, DMSO-*d*<sub>6</sub>):  $\delta$  2.83 (s, 3H, NCH<sub>3</sub>), 2.95 (s, 3H, NCH<sub>3</sub>), 3.60 (s, 3H, OCH<sub>3</sub>), 3.82 (s, 2H, =C-CH<sub>2</sub>), 4.21 (s, 2H, NCH<sub>2</sub>), 11.73 (br.s, 1H, NH). <sup>13</sup>C NMR (75 MHz, DMSO-*d*<sub>6</sub>):  $\delta$  26.74, 30.06 (2NCH<sub>3</sub>), 33.35 (CH<sub>2</sub>), 48.48 (CH<sub>2</sub>), 52.23 (OCH<sub>3</sub>), 126.93 (=C), 138.53 (=C-S), 148.78, 157.24, 157.76, 162.79, 164.46, 170.69 (NH-C=N, C-C=N, CONH, COOH, COOMe). HRMS (ESI): *m/z* [*M* + Na]<sup>+</sup> calcd for C<sub>13</sub>H<sub>15</sub>N<sub>5</sub>O<sub>6</sub>S: 392.0635; found: 392.0628.

**(Z)-5-(2-methoxy-2-oxoethyl)-2-(((E)-3-methyl-2-oxo-1-phenylimidazolidin-4-ylidene) hydrazineylidene)-4-oxo-3,4-dihydro-2H-1,3-thiazine-6-carboxylic acid (9l).** Yield 190 mg (44%); yellow solid; mp: 188–189 °C. IR (KBr):  $\nu$  3124 (NH), 3037 (Ph), 2950 (Alk), 2856 (C-S), 2575 (COOH) 1738, 1704, 1662 (C=N, C=O, NH-C=O), 1584 (C=C-S) cm<sup>-1</sup>. <sup>1</sup>H NMR (300 MHz, DMSO-*d*<sub>6</sub>):  $\delta$  3.06 (s, 3H, NCH<sub>3</sub>), 3.60 (s, 3H, OCH<sub>3</sub>), 3.83 (s, 2H, =C-CH<sub>2</sub>), 4.73 (s, 2H, CH<sub>2</sub>), 7.10 (t, *J* = 7.3 Hz, 1H, Ph-4), 7.39 (t, *J* = 7.9 Hz, 2H, Ph-3,5), 7.58 (d, *J* = 7.5 Hz, 2H, Ph-2,6), 11.93 (br. s, 1H, NH). <sup>13</sup>C NMR (75 MHz, DMSO-*d*<sub>6</sub>):  $\delta$  26.77 (NCH<sub>3</sub>), 33.37 (=C-CH<sub>2</sub>), 47.03 (CH<sub>2</sub>), 52.25 (OCH<sub>3</sub>), 118.18 (Ph-3,5), 123.67, 127.07 (=C, Ph-4), 129.47 (Ph-2,6), 138.43, 138.95 (=C-S, Ph-1), 149.59, 154.73, 155.95, 162.77, 164.39, 170.68 (NH-C=N, C-C=N, NH-C=O, COOH, COOMe). HRMS (ESI): *m/z* [*M* + *H*]<sup>+</sup> calcd for C<sub>18</sub>H<sub>17</sub>N<sub>5</sub>O<sub>6</sub>S: 432.0972; found: 432.0966.

### Procedure for the synthesis of 1-(4-chlorophenyl)-3-methylthiourea (10)

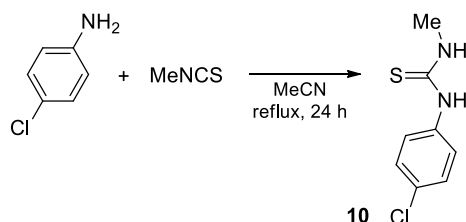

A solution of 4-chloroaniline (12.7 g, 50 mmol) and methyl isothiocyanate (7.3 g, 50 mmol) in MeCN (10 mL) was refluxed for 24 h, cooled, and evaporated under reduced pressure. The solid residue in the flask was triturated with 2 mL of cold acetonitrile, filtered, and dried.

**1-(4-Chlorophenyl)-3-methylthiourea (10).** Yield 8.05 g (80%); white solid; mp: 140–141 °C.  $^1\text{H}$  NMR (300 MHz, DMSO- $d_6$ ):  $\delta$  2.92 (s, 3H, NCH<sub>3</sub>), 7.36 (d,  $J$  = 7.9 Hz, 2H, Ar), 7.45 (d,  $J$  = 7.9 Hz, 2H, Ar), 7.77 (br.s, 1H, 3-NH), 9.62 (br.s, 1H, 1-NH).  $^{13}\text{C}$  NMR (75 MHz, DMSO- $d_6$ ):  $\delta$  31.08 (NCH<sub>3</sub>), 124.73, 128.03, 128.50 (Ar-2-6), 138.32 (Ar-1), 181.14 (C=S). HRMS (ESI):  $m/z$  [ $M + \text{H}$ ] $^+$  calcd for C<sub>8</sub>H<sub>9</sub>N<sub>2</sub>S: 201.0248; found: 201.0253.

### Procedure for the synthesis of 1-(4-chlorophenyl)-4,5-dihydroxy-3-methylimidazolidine-2-thione (11j)

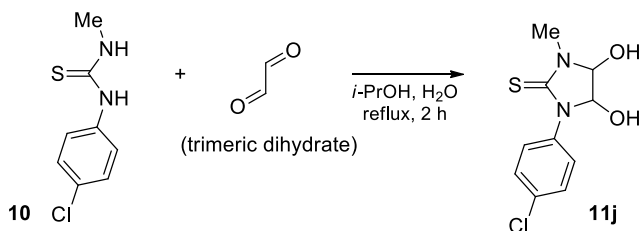

A solution of thiourea **10** (6.0 g, 30 mmol) and glyoxal trimeric dihydrate (2.1 g, 10 mmol (equivalent to 30 mmol of glyoxal)) in a mixture of *i*PrOH (5 mL) and H<sub>2</sub>O (0.5 mL) was refluxed for 2 h, cooled, and evaporated under reduced pressure. After standing for 1 hour, the oil crystallizes into a solid and was used without further purification.

### Crystallographic data

Single crystals of **7a** were obtained from a methanol solution. Data were collected at 100K on a Bruker Quest D8 diffractometer equipped with a Photon-III area-detector (shutterless  $\varphi$ - and  $\omega$ -scan technique), using graphite-monochromatized MoK $\alpha$  radiation. The intensity data were integrated by the SAINT program<sup>5</sup> and were corrected for absorption and decay using SADABS.<sup>6</sup> The structure was solved by direct methods using SHELXT<sup>7</sup> and refined on  $F^2$  using SHELXL-2018.<sup>8</sup> Positions of all atoms were found from the electron density difference map. Atoms were refined with individual anisotropic (non-hydrogen atoms) or isotropic (hydrogen atoms) displacement parameters. The SHELXTL program suite<sup>5</sup> was used for molecular graphics. Full crystallographic data have been deposited at the Cambridge Crystallographic Data Center (deposit CCDC 2250872).

## References

1. A. N. Izmet's'ev, D. B. Vinogradov, N. G. Kolotyrkina, A. N. Kravchenko and G. A. Gazieva, *Beilstein J. Org. Chem.*, **2021**, 17, 1141.
2. A. N. Izmet's'ev, L. V. Anikina, I. E. Zanin, N. G. Kolotyrkina, E. S. Izmalkova, A. N. Kravchenko, G. A. Gazieva *New J. Chem.* **2022**, 46, 11632.
3. A. N. Izmet's'ev, V. A. Motornov, D. B. Vinogradov, S. L. Ioffe, A. N. Kravchenko, G. A. Gazieva *Org. Chem. Front.*, **2022**, 9, 4998.
4. V. V. Baranov, Y. V. Nelyubina, A. N. Kravchenko, N. G. Kolotyrkina, K. A. Biriukova *Tetrahedron Lett.* **2015**, 56, 6085.
5. Bruker. APEX-III. *Bruker AXS Inc.*, Madison, Wisconsin, USA, **2019**.
6. L. Krause, R. Herbst-Irmer, G. M. Sheldrick and D. Stalke, *J. Appl. Crystallogr.* **2015**, 48, 3.
7. G. M. Sheldrick, *Acta Crystallogr., Sect. A: Found. Crystallogr.*, **2015**, 71, 3.
8. G. M. Sheldrick, *Acta Crystallogr., Sect. C: Struct. Chem.*, **2015**, 71, 3.

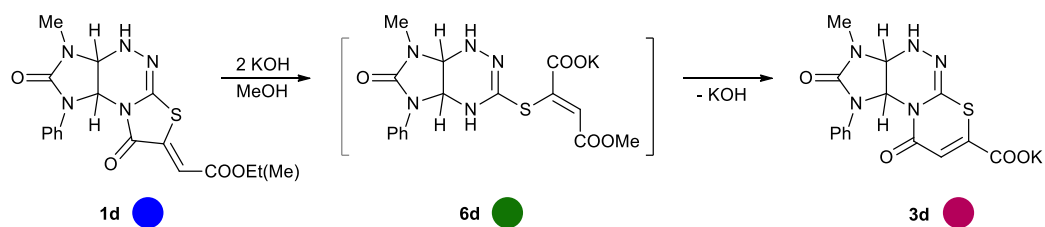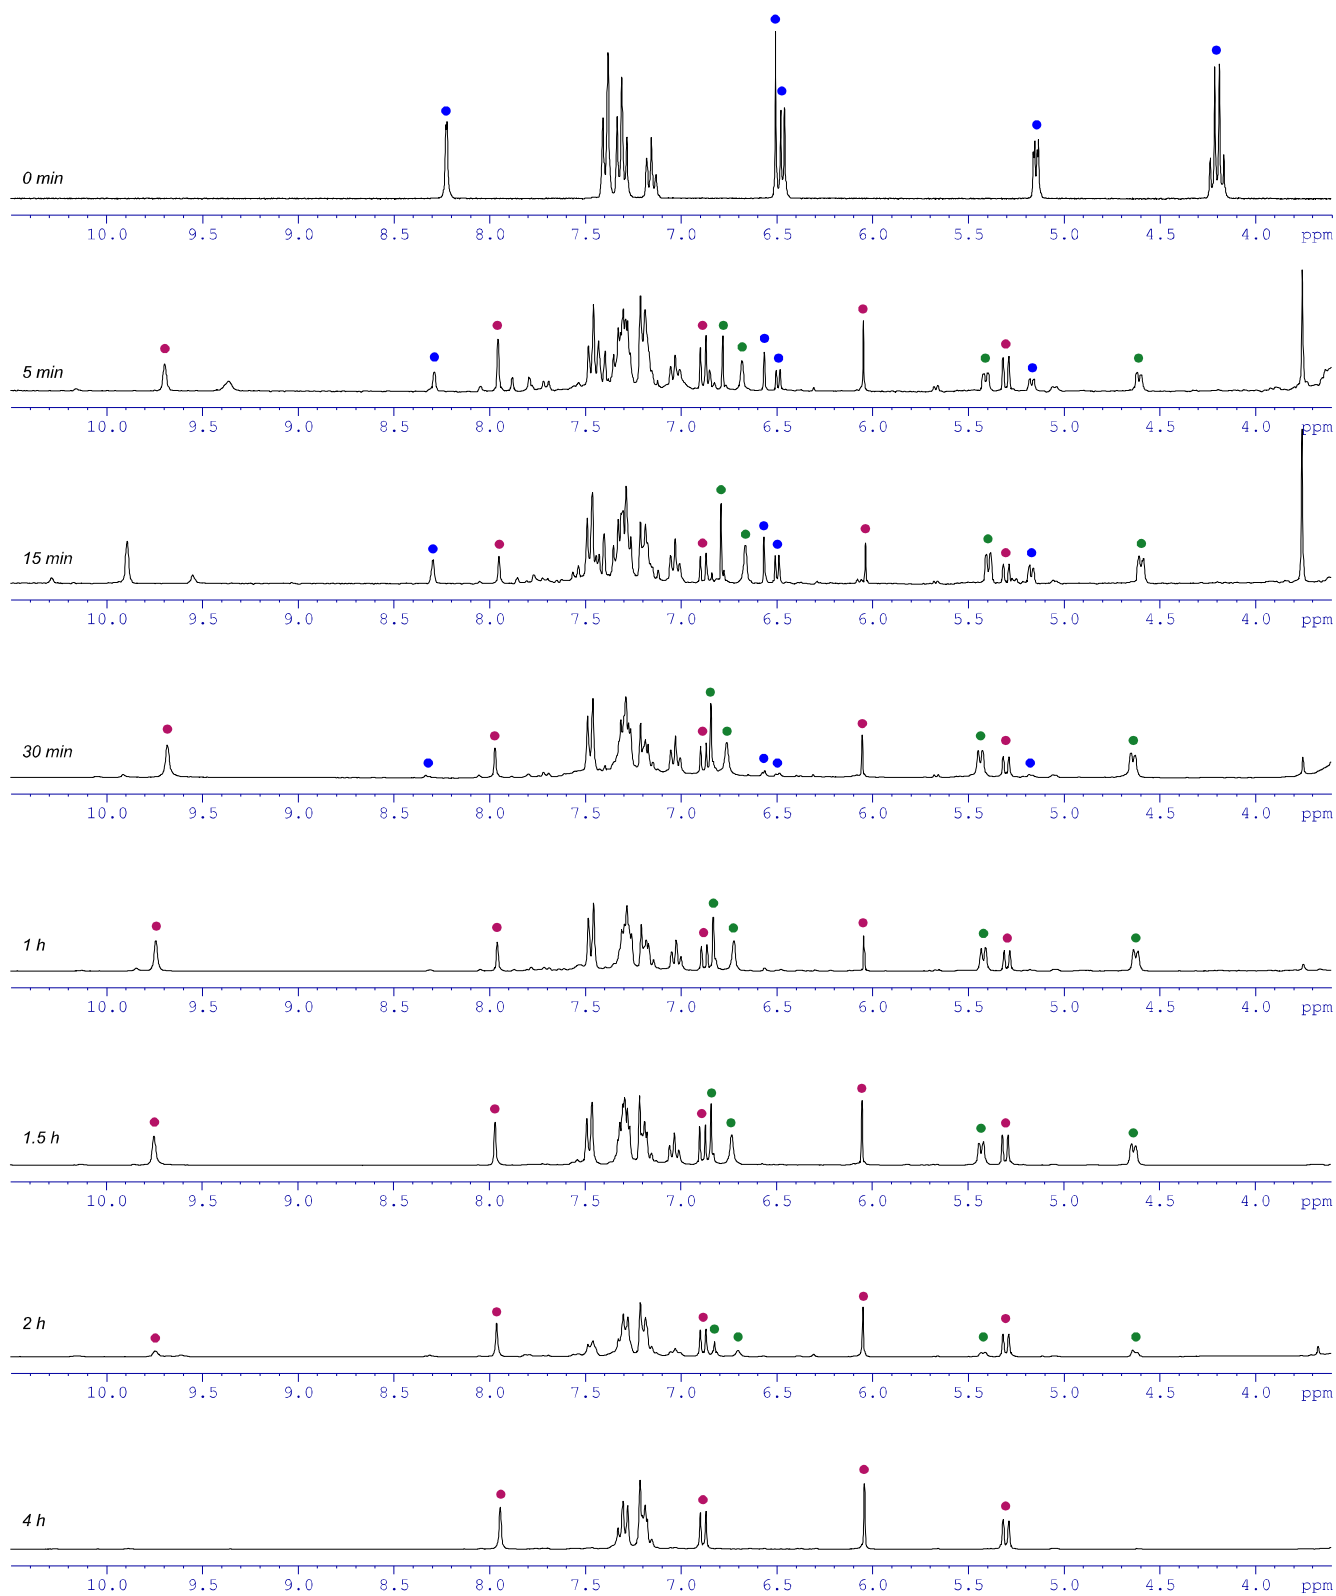



/KANI VDB225.2

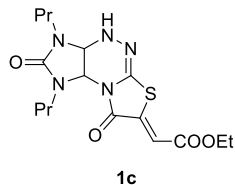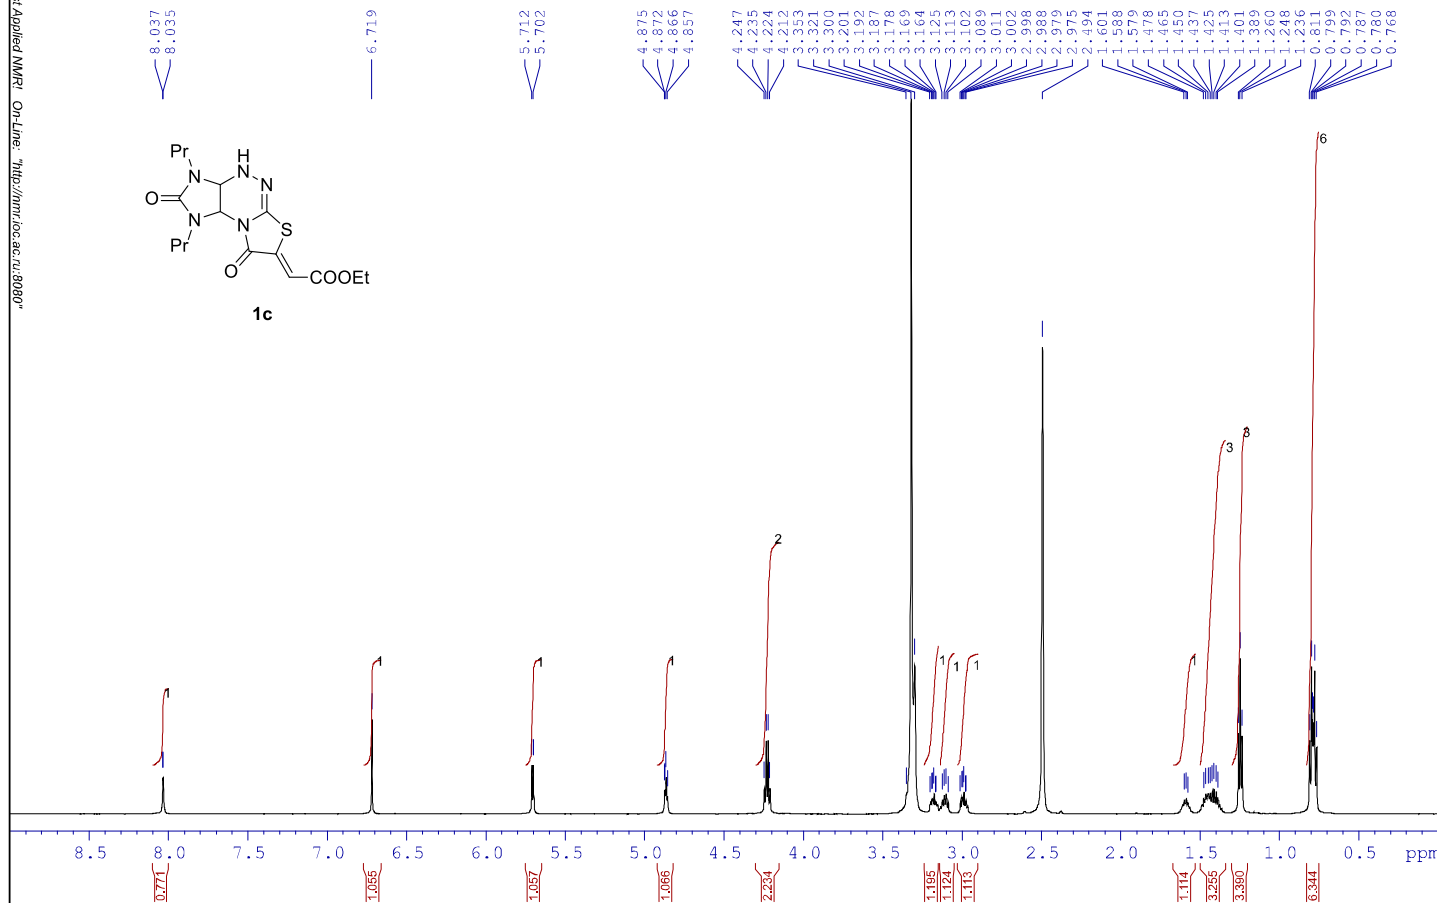

/KANI VDB225.2

165.705

162.740

158.283

141.792

134.945

113.589

64.183  
62.206  
61.399

44.675  
41.823  
39.953  
39.819  
39.682  
39.583  
39.405  
39.285  
39.127

20.739  
20.477

14.053  
11.104  
11.045

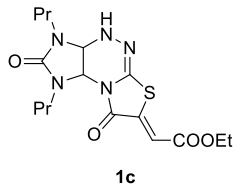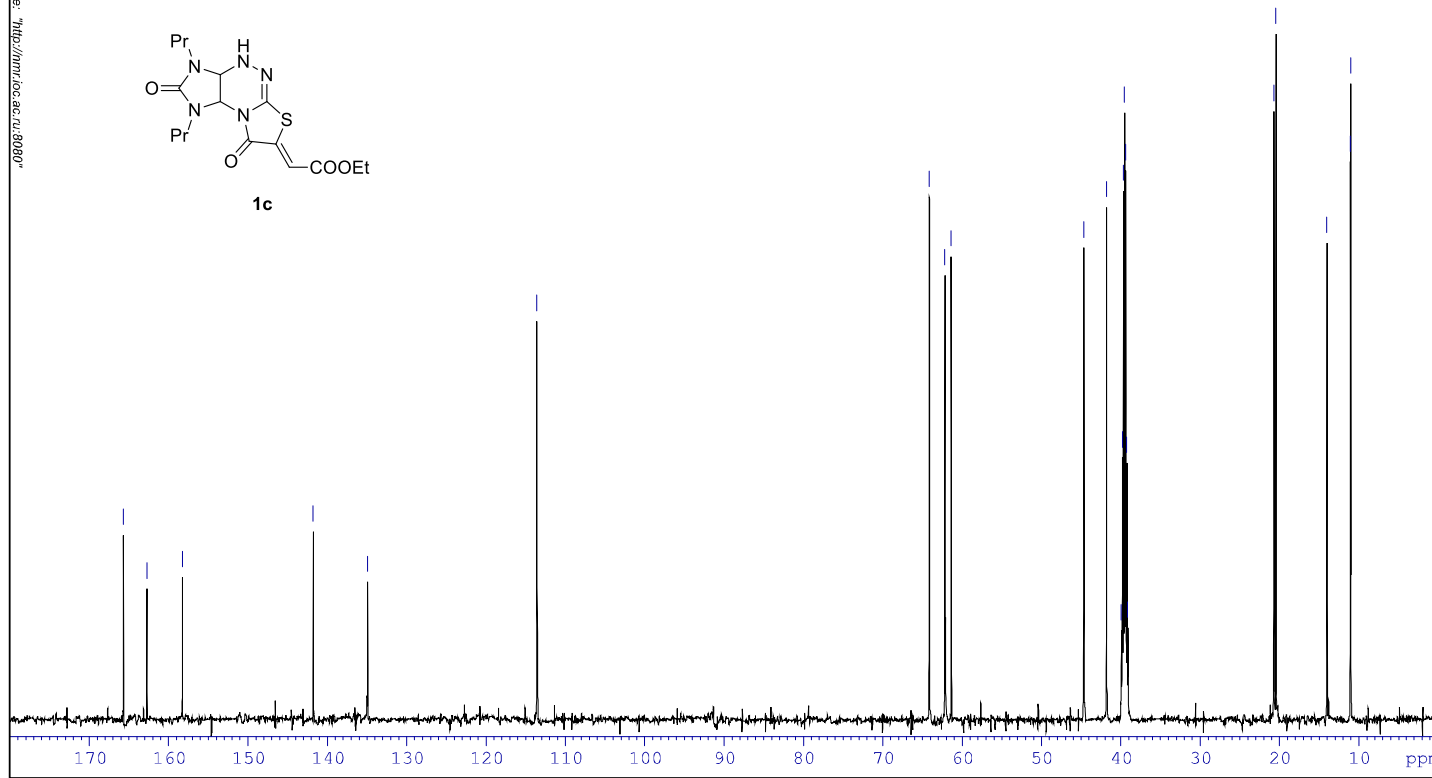

/KANI IA1826.1

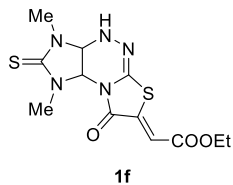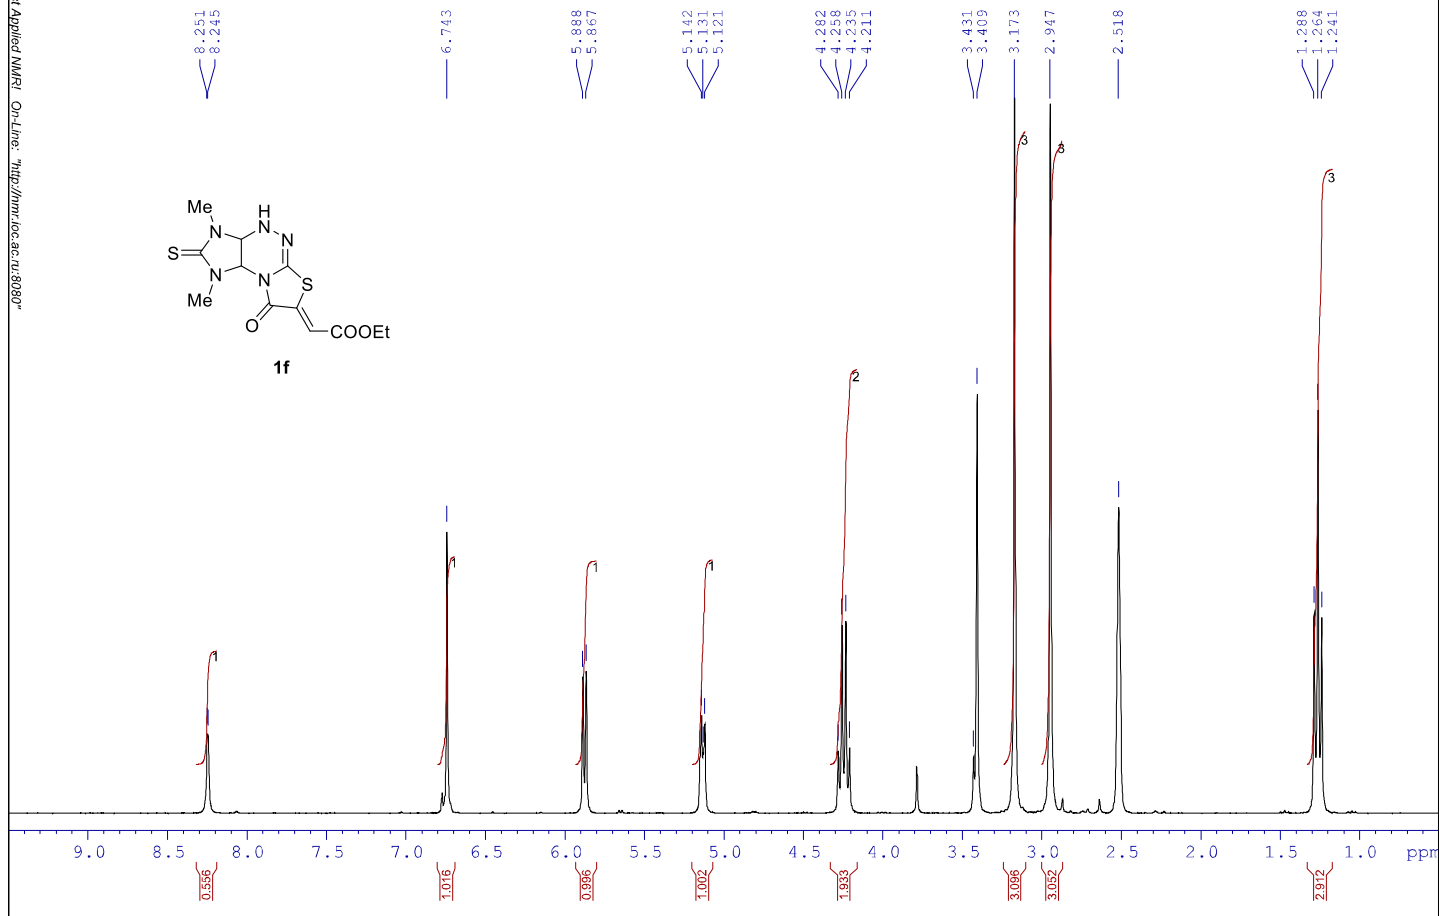

/KANI IA1826.1

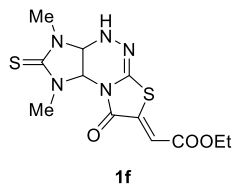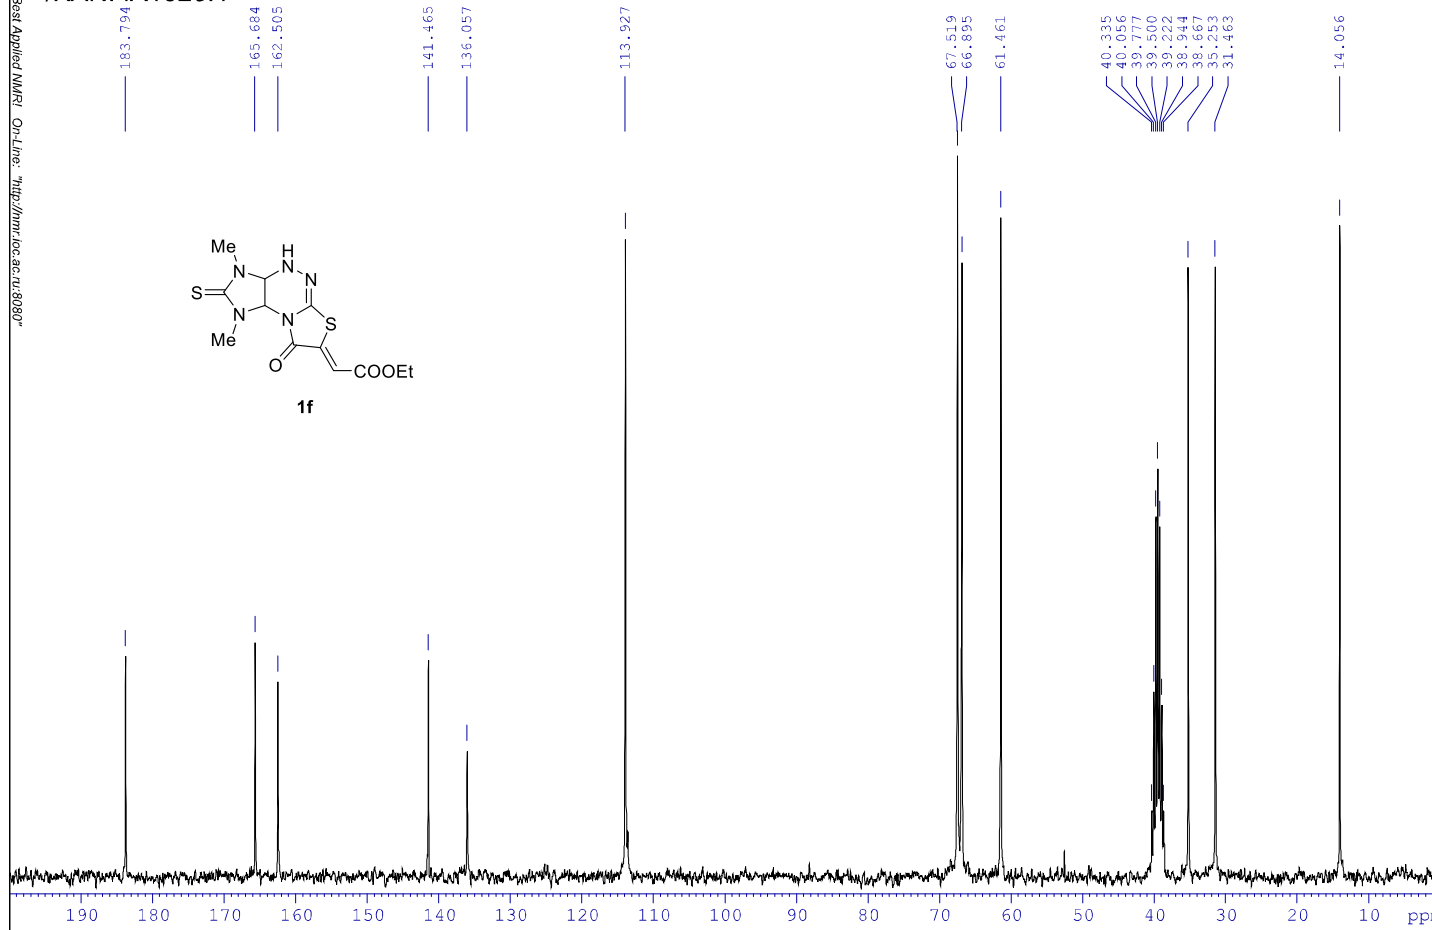

/KANI IA1835.1

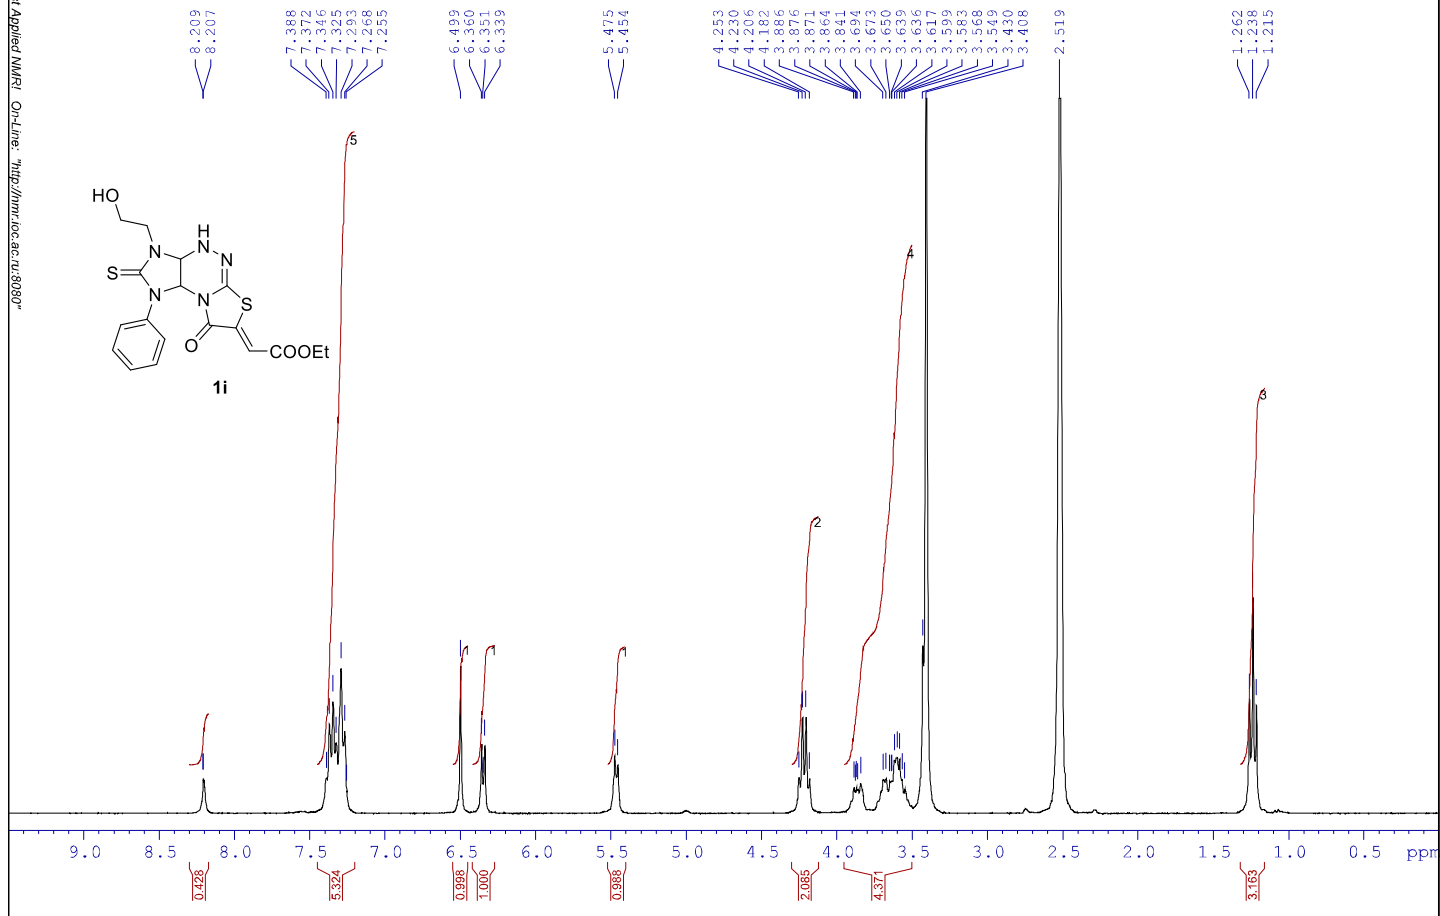

/KANI IA1835.1

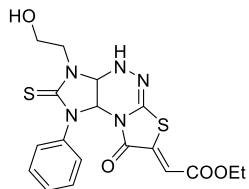

**1i**

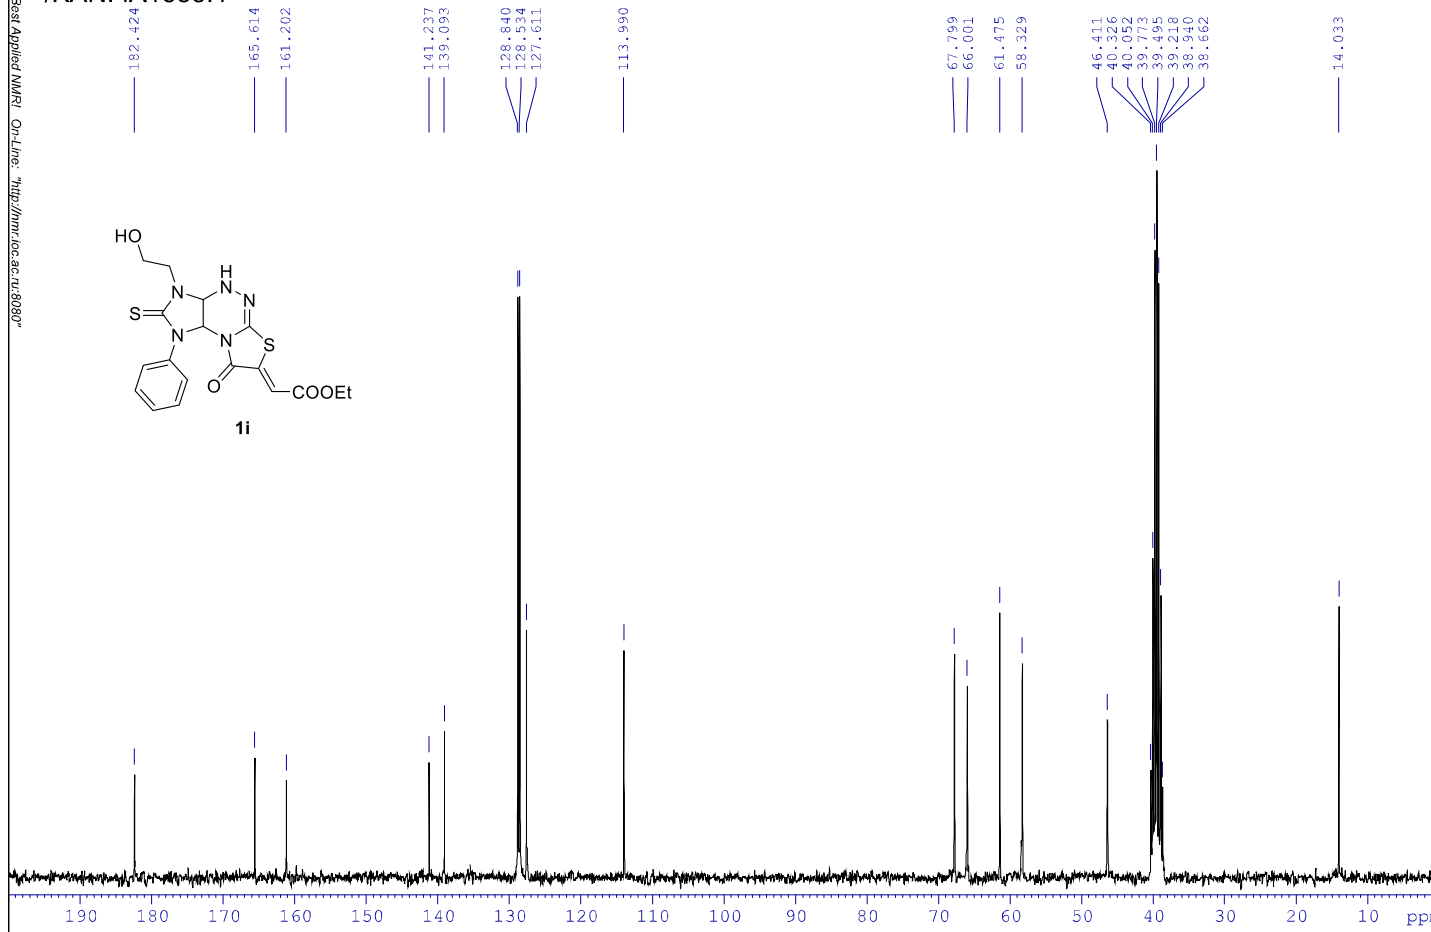

/KANI VDB200.2

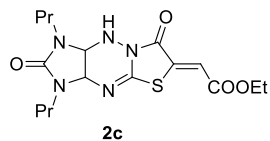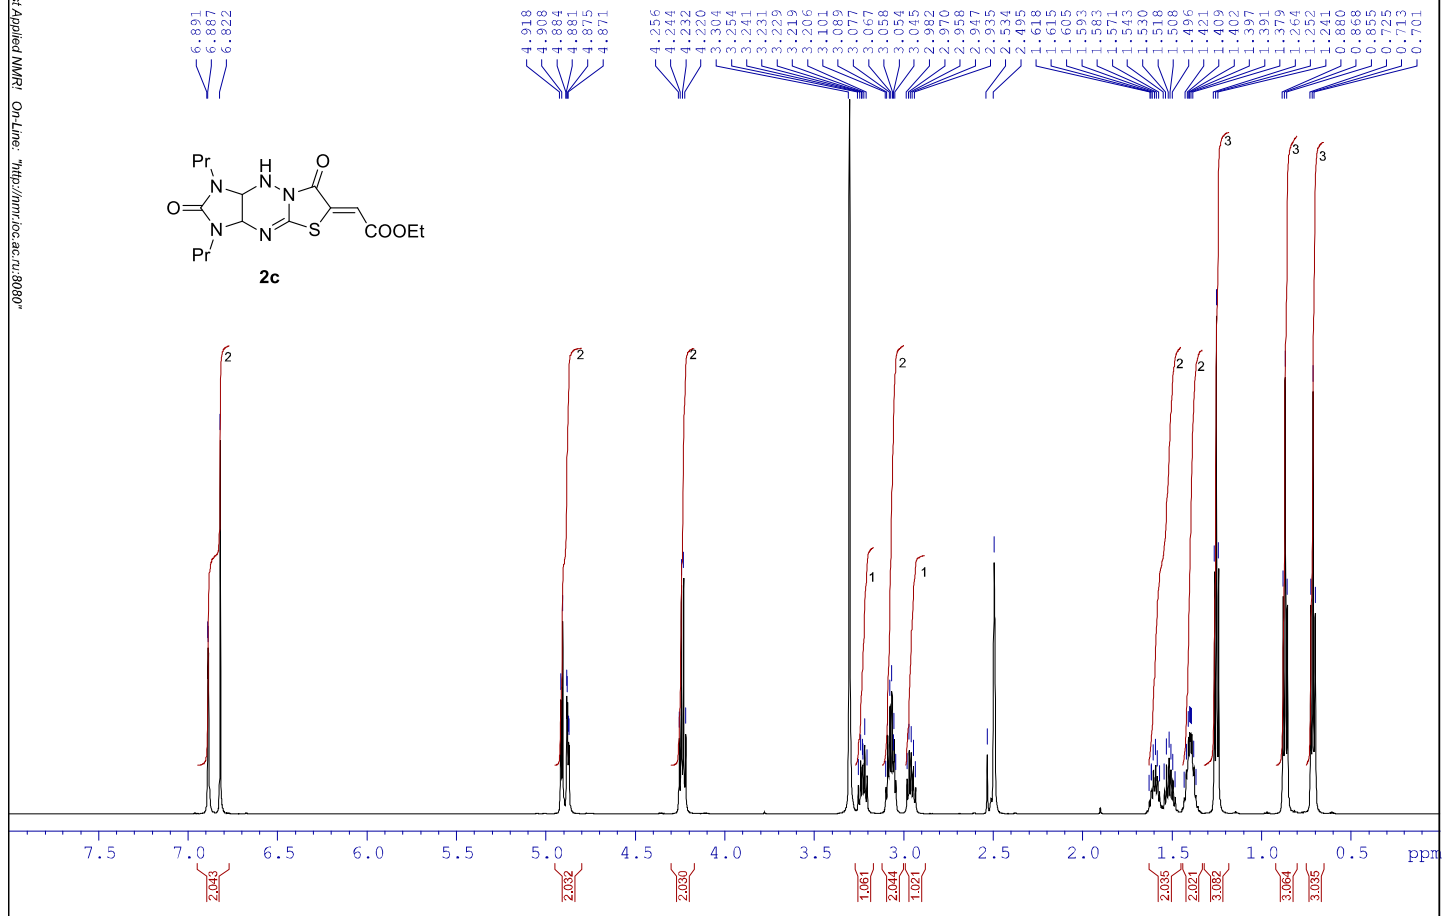

/KANI VDB200.2

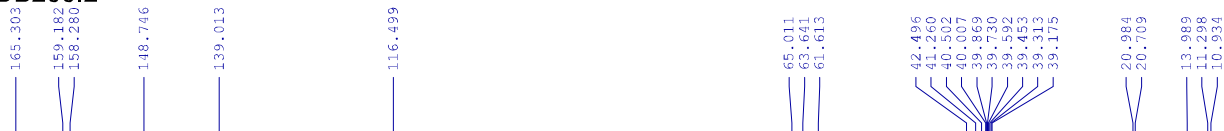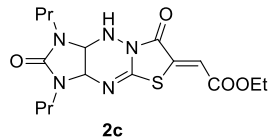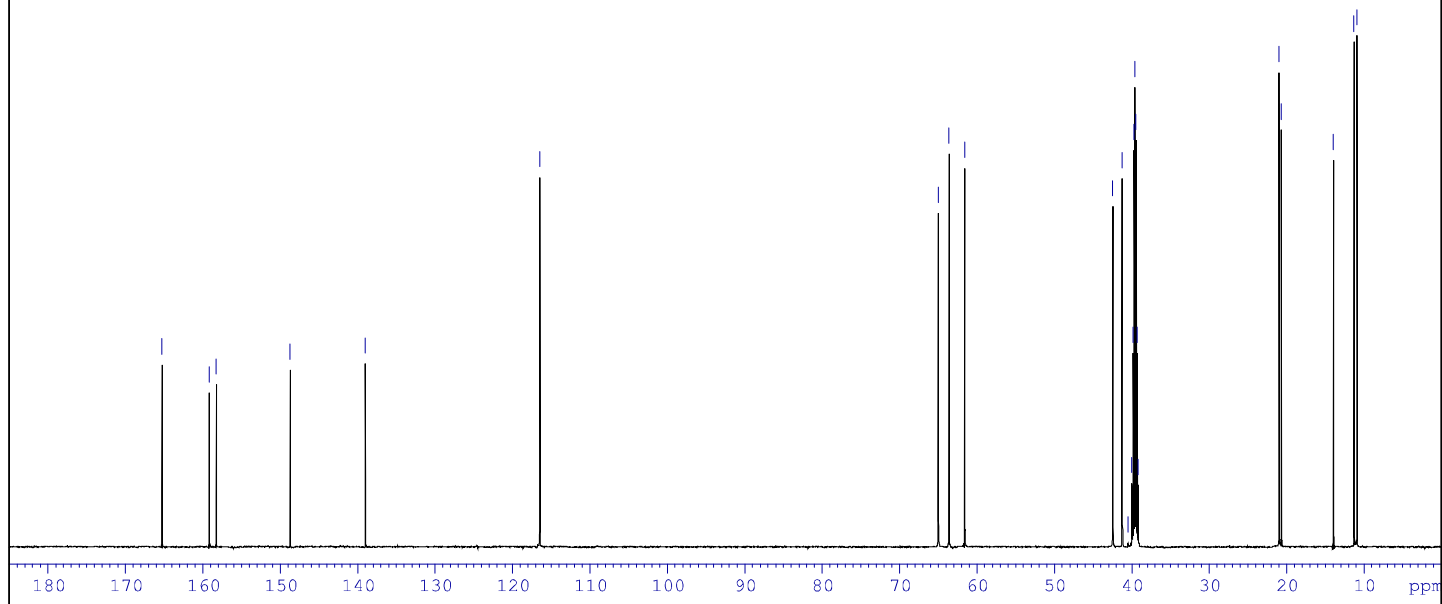



/KANI IA1819.2

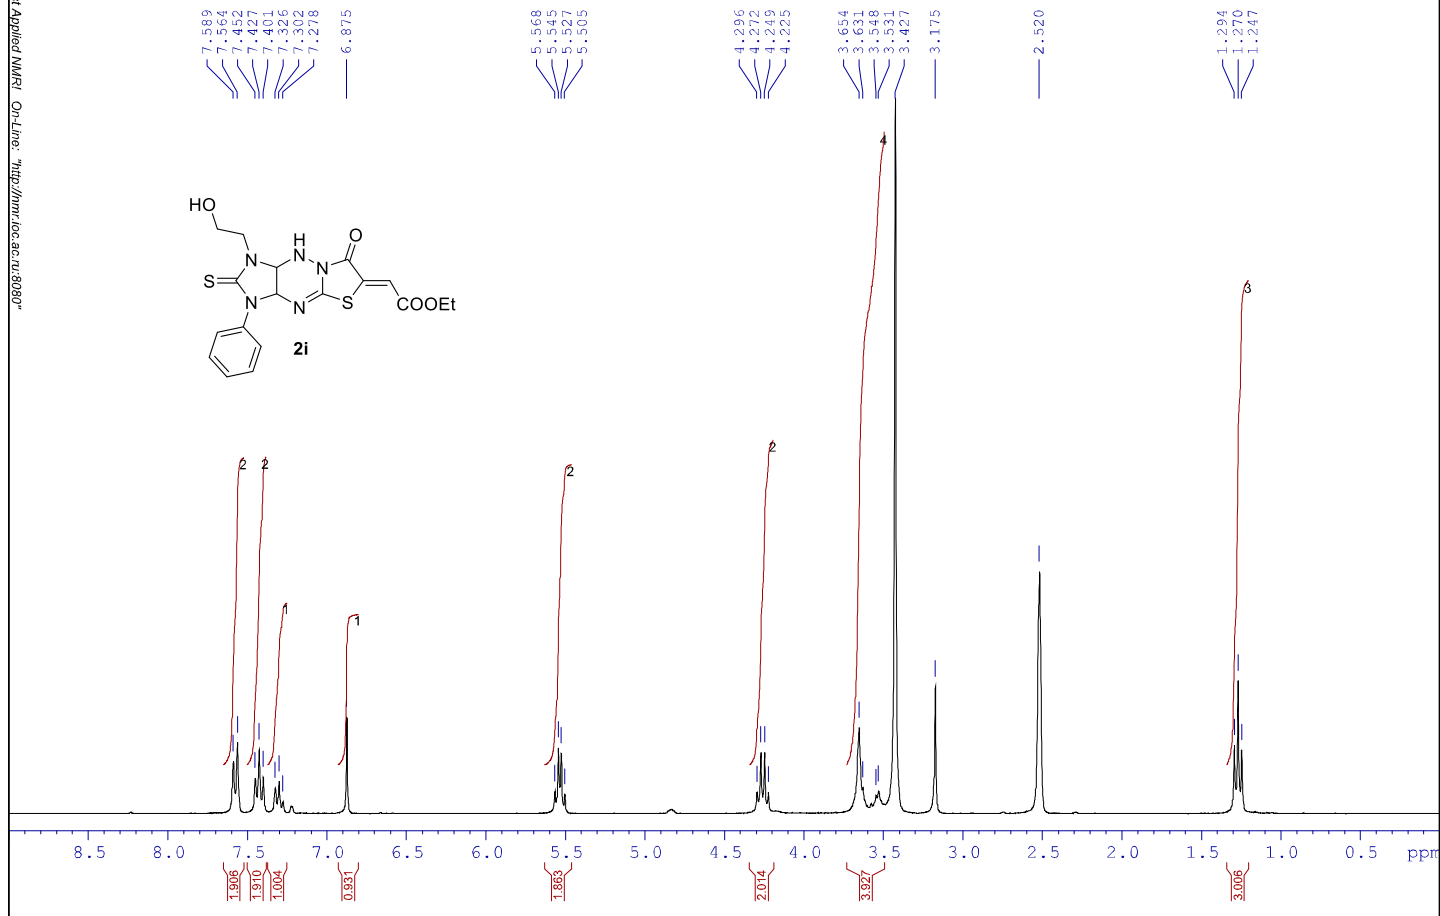

/KANI IA1819.2

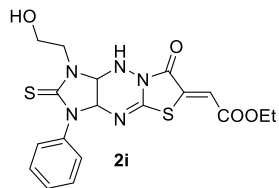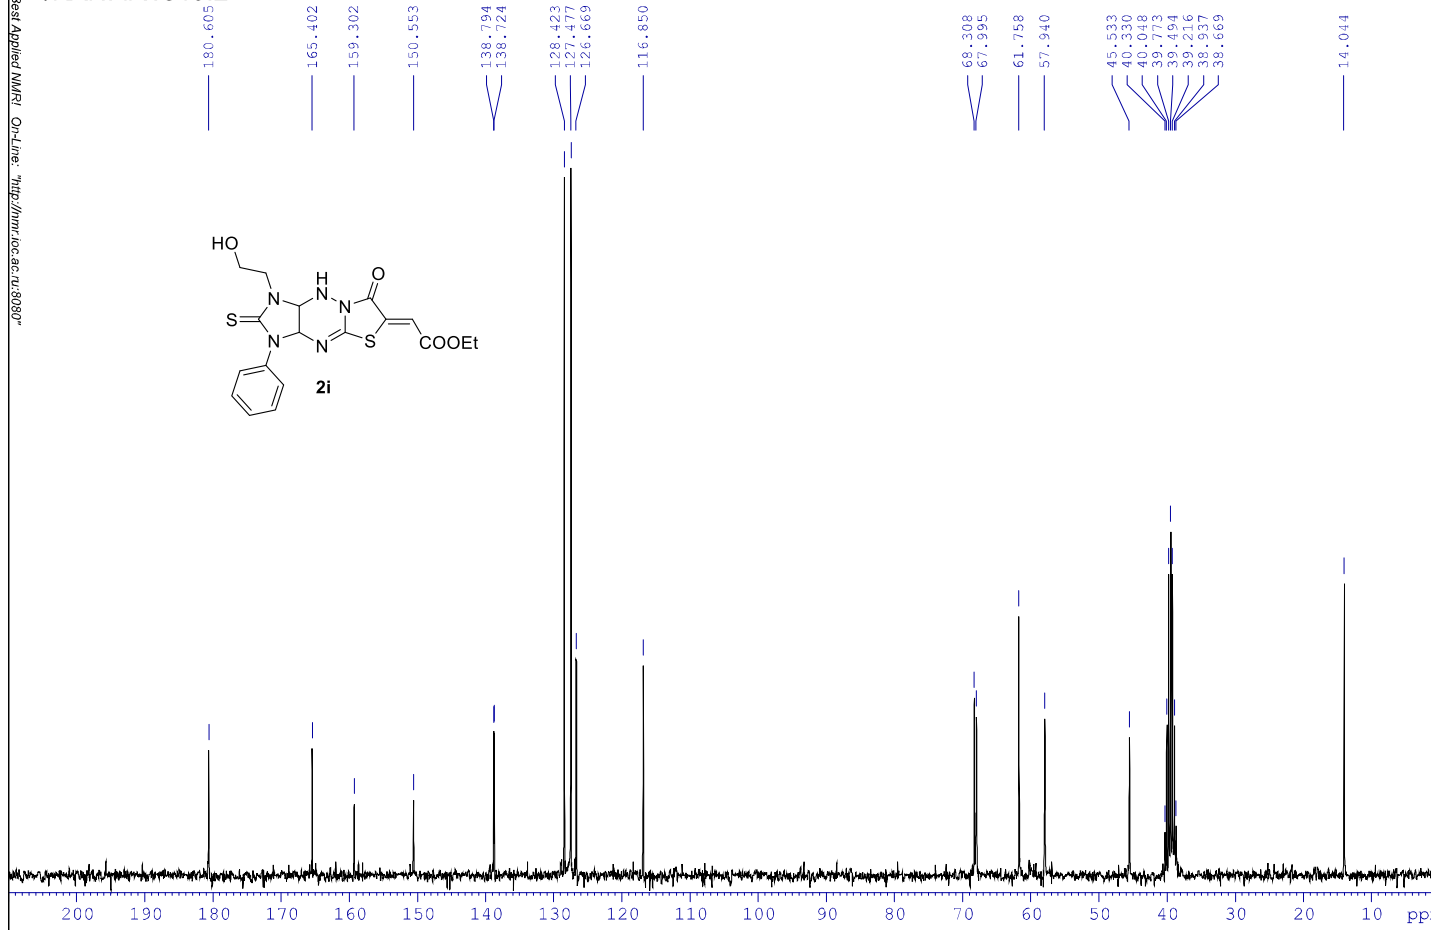

/KANI IA1839.1

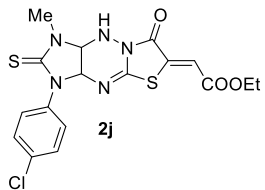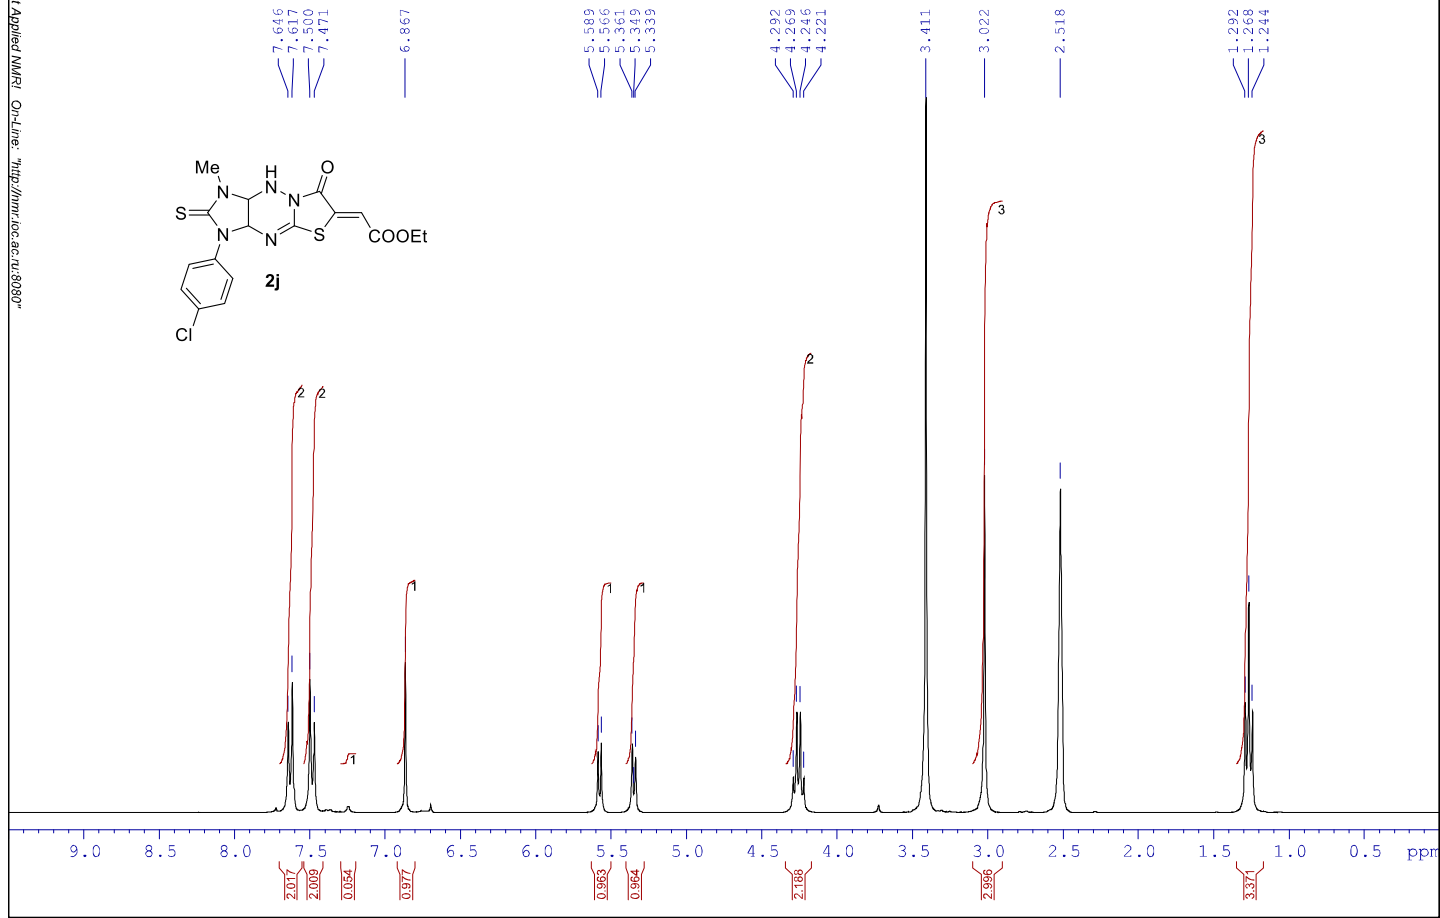

/KANI IA1839.1

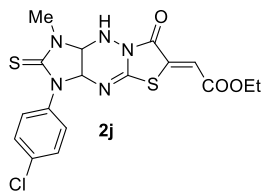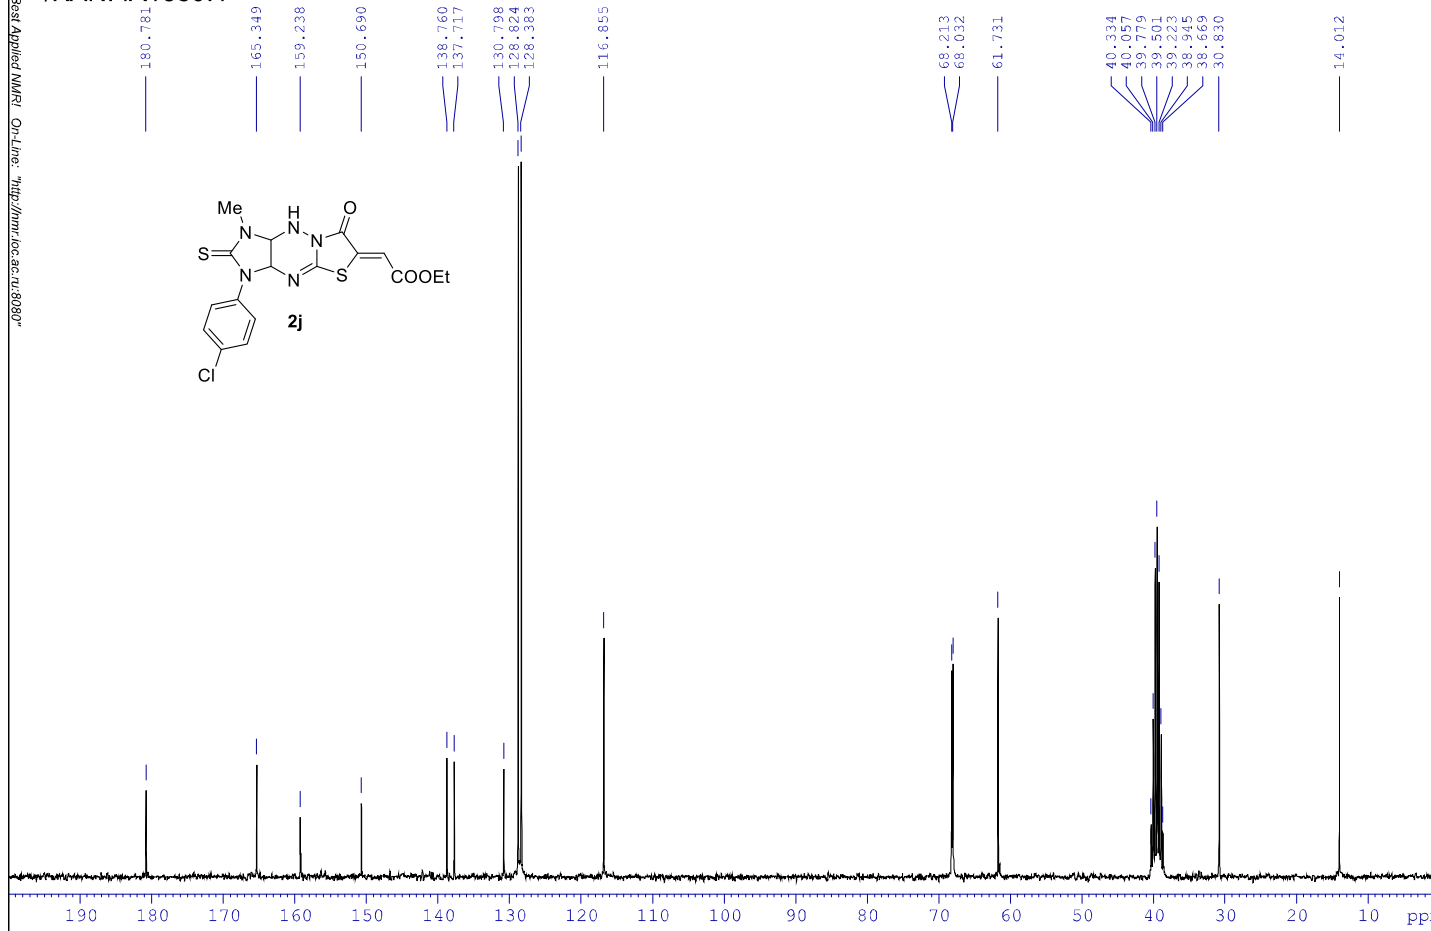

/KANI IA1134.3

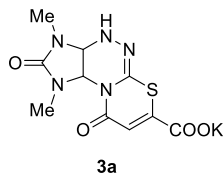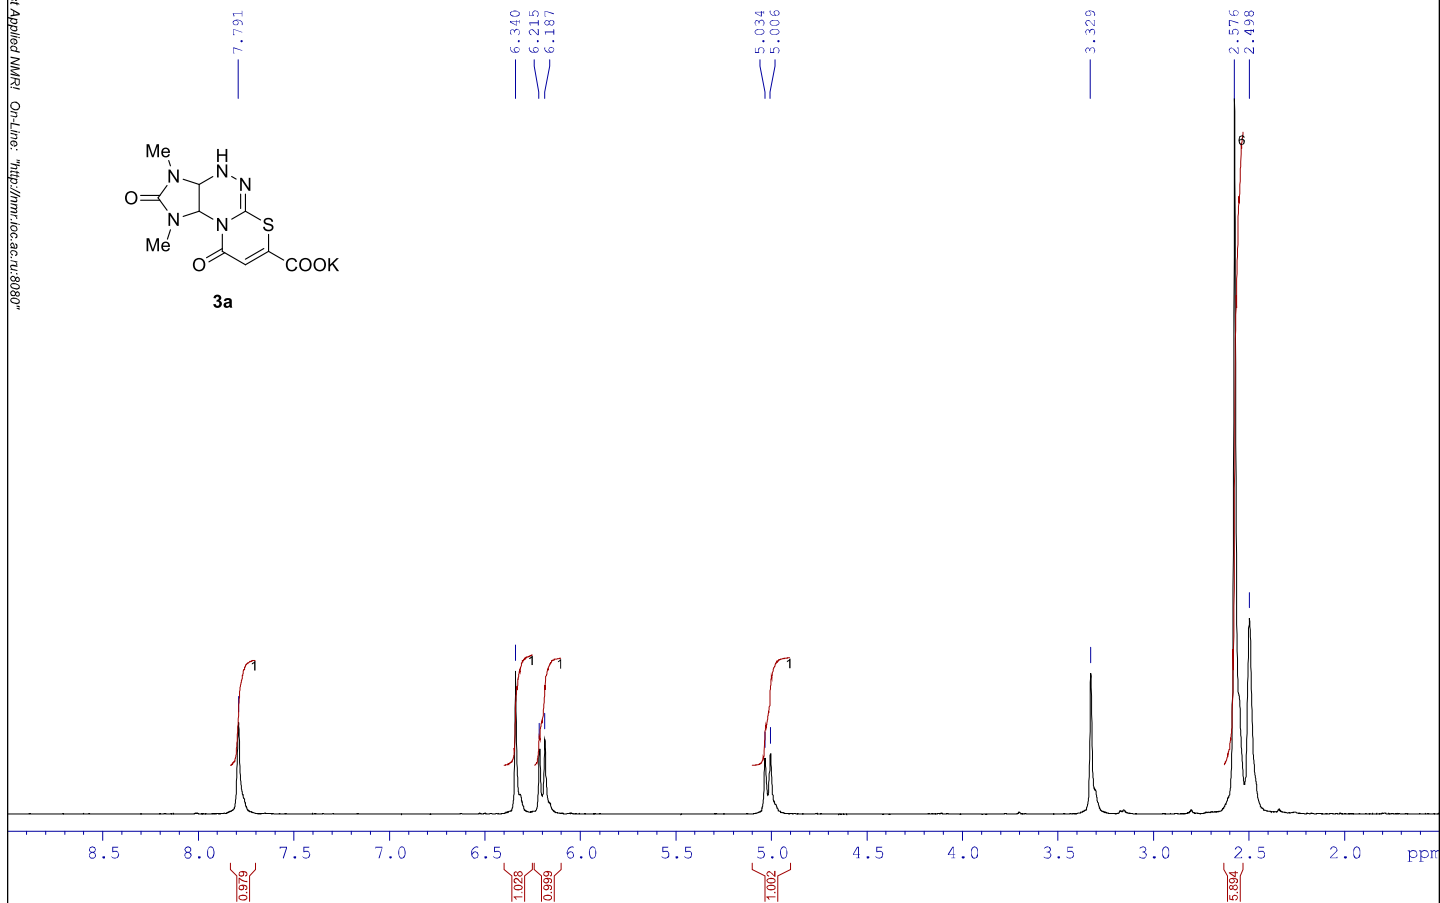

/KANI IA1134.3

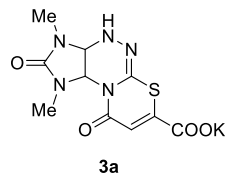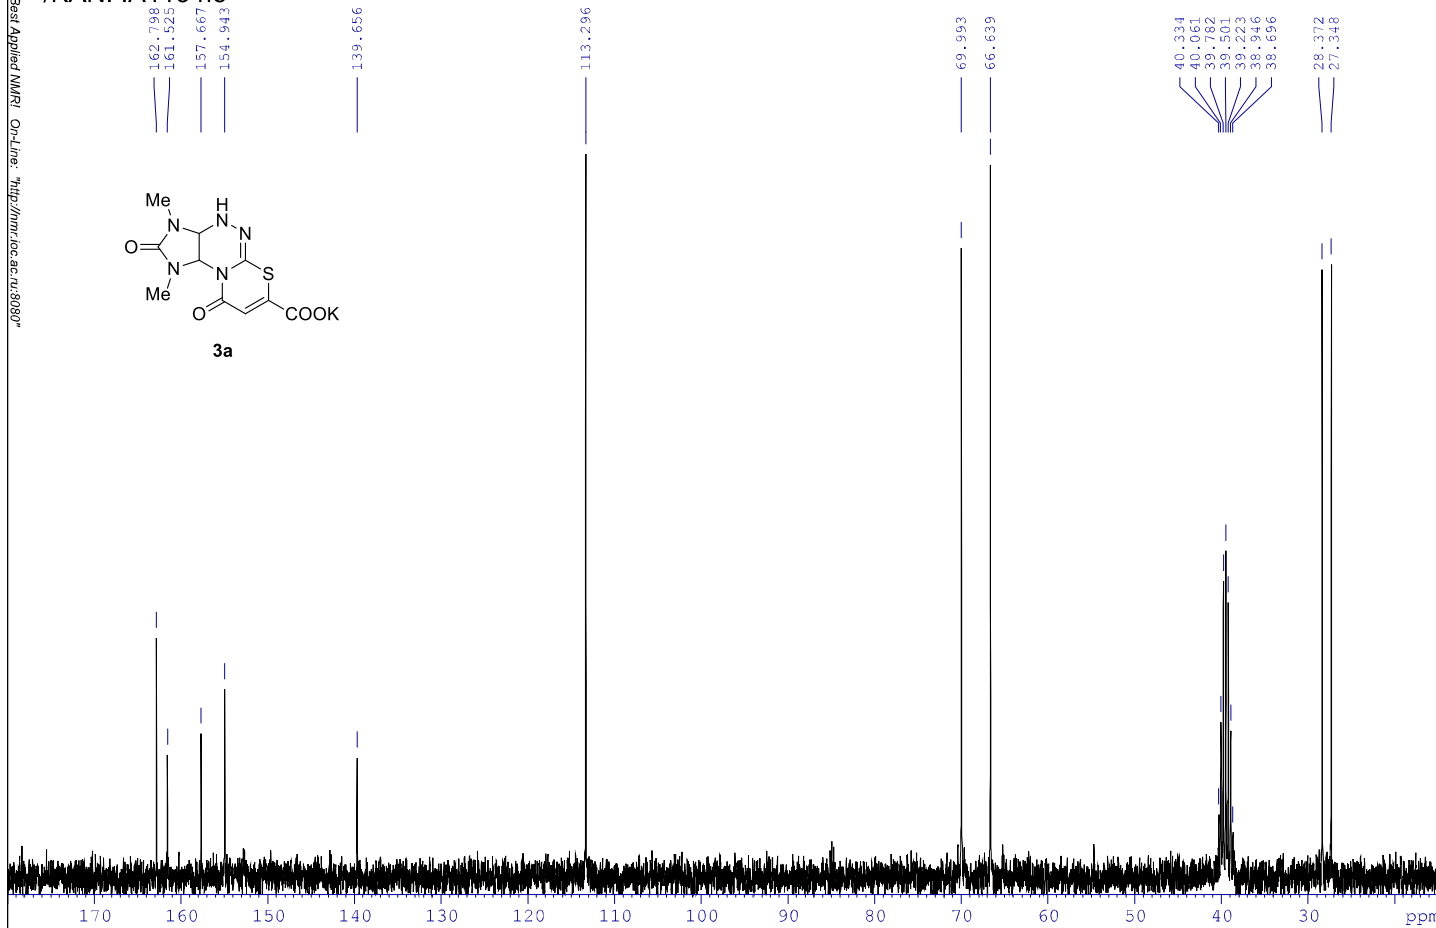

/KANI VDB42.1

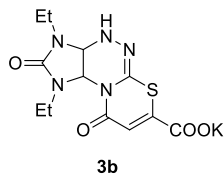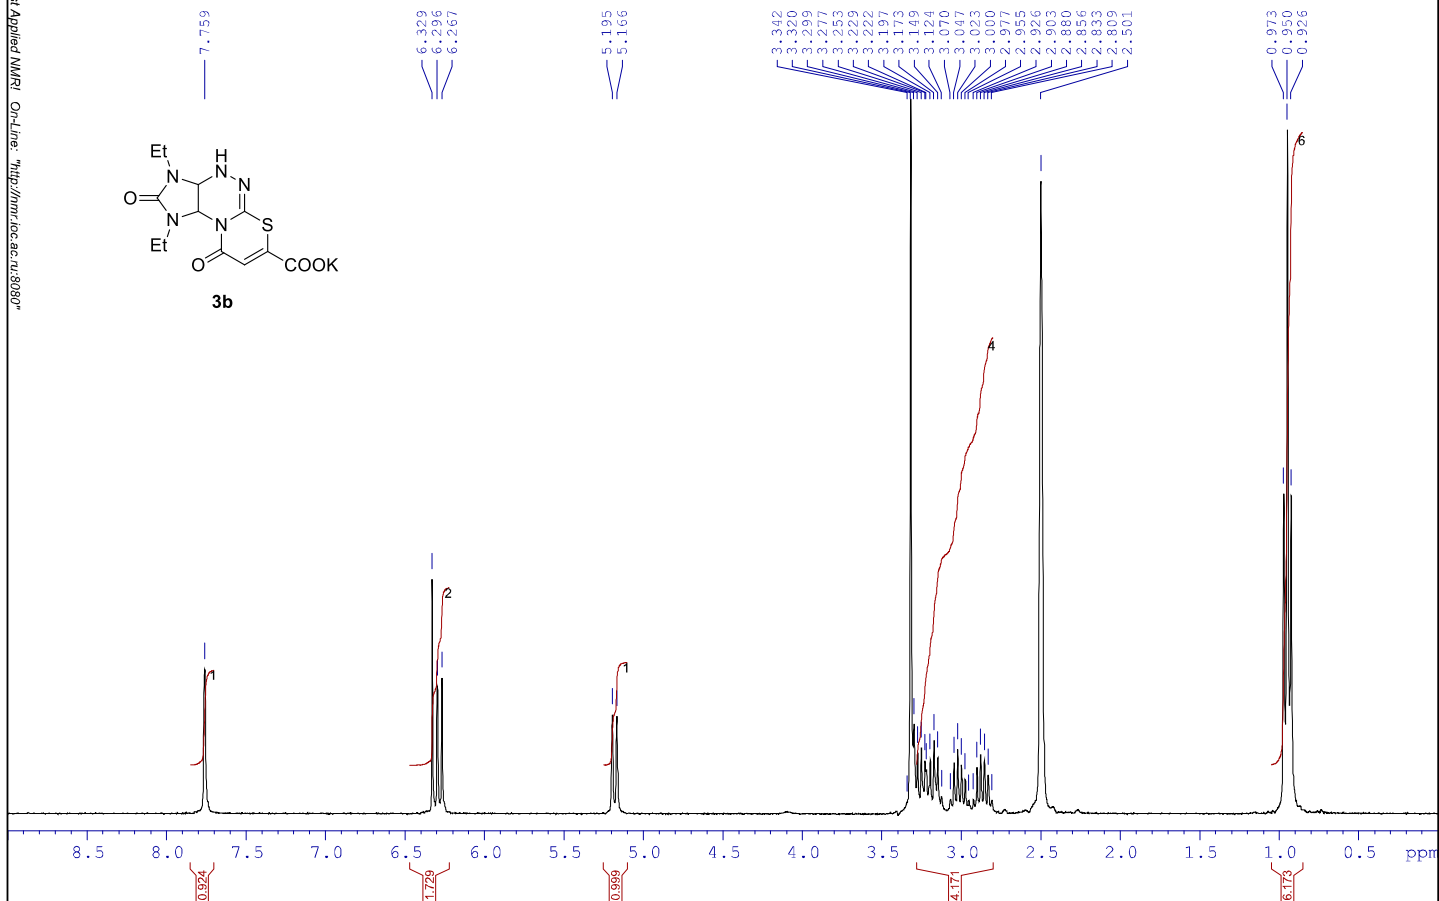

/KANI VDB42.1 DMSO-d6 13C 17mg 1024scans

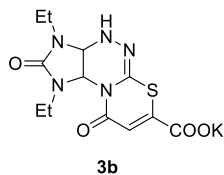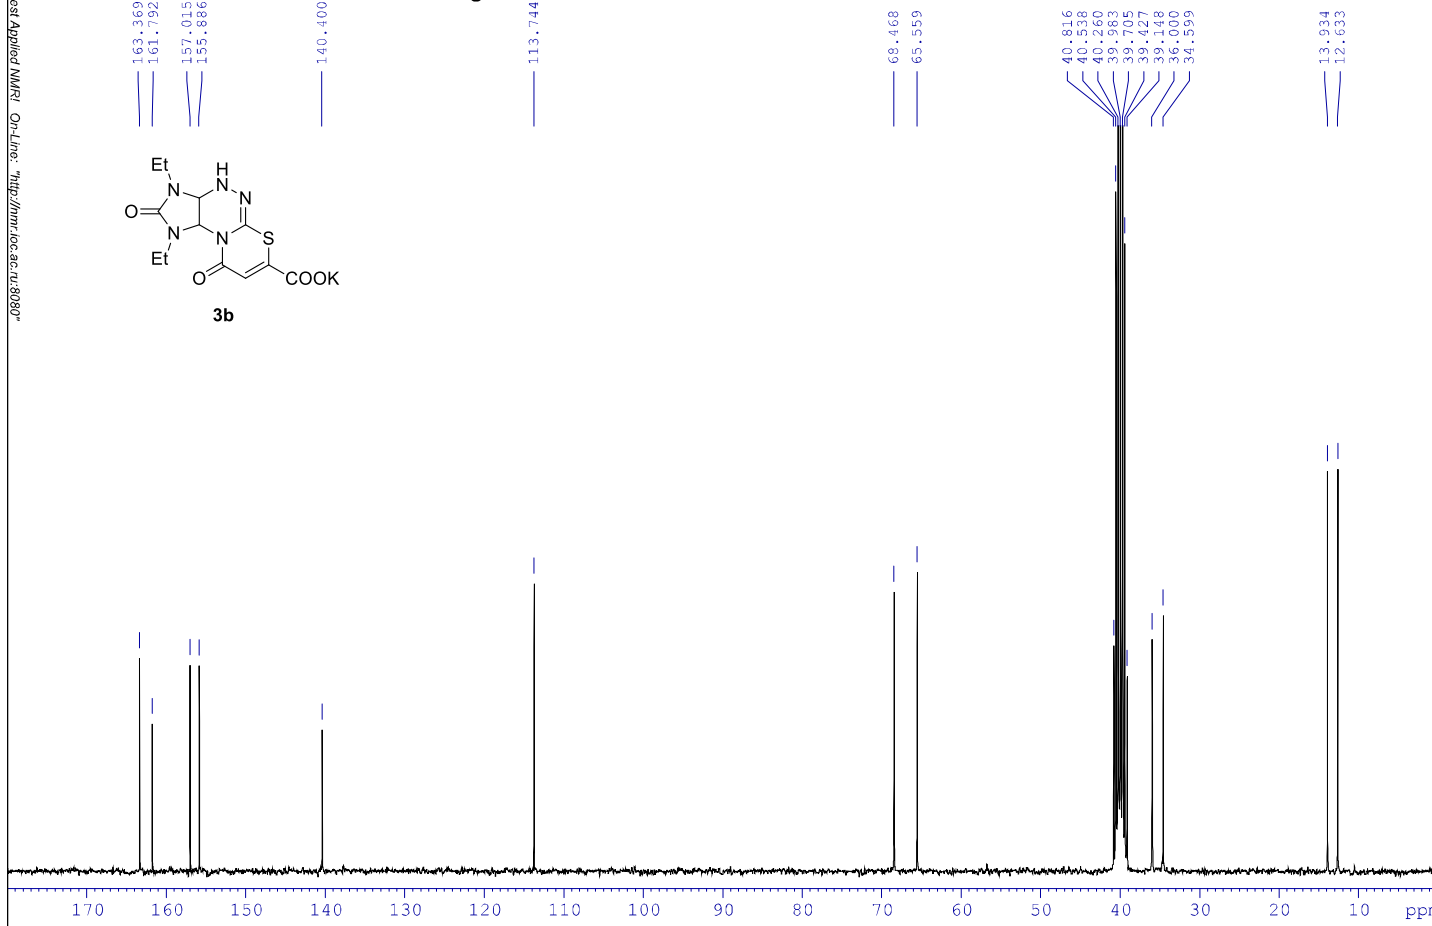



# /KANI VDB350.2

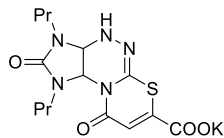

**3c**

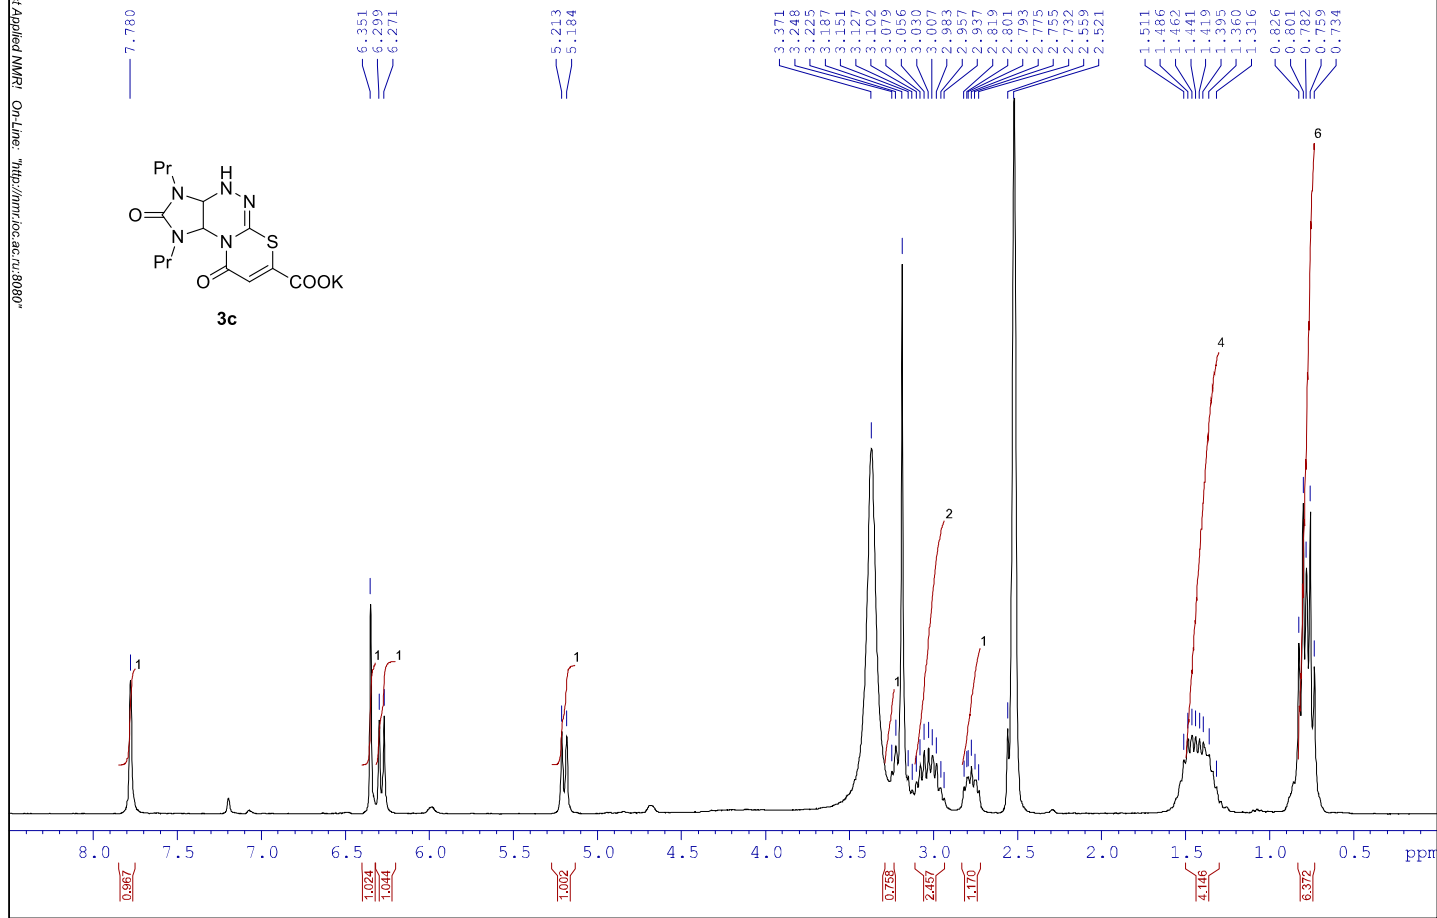

/KANI VDB350.2

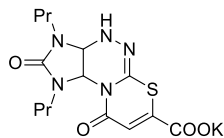

**3c**

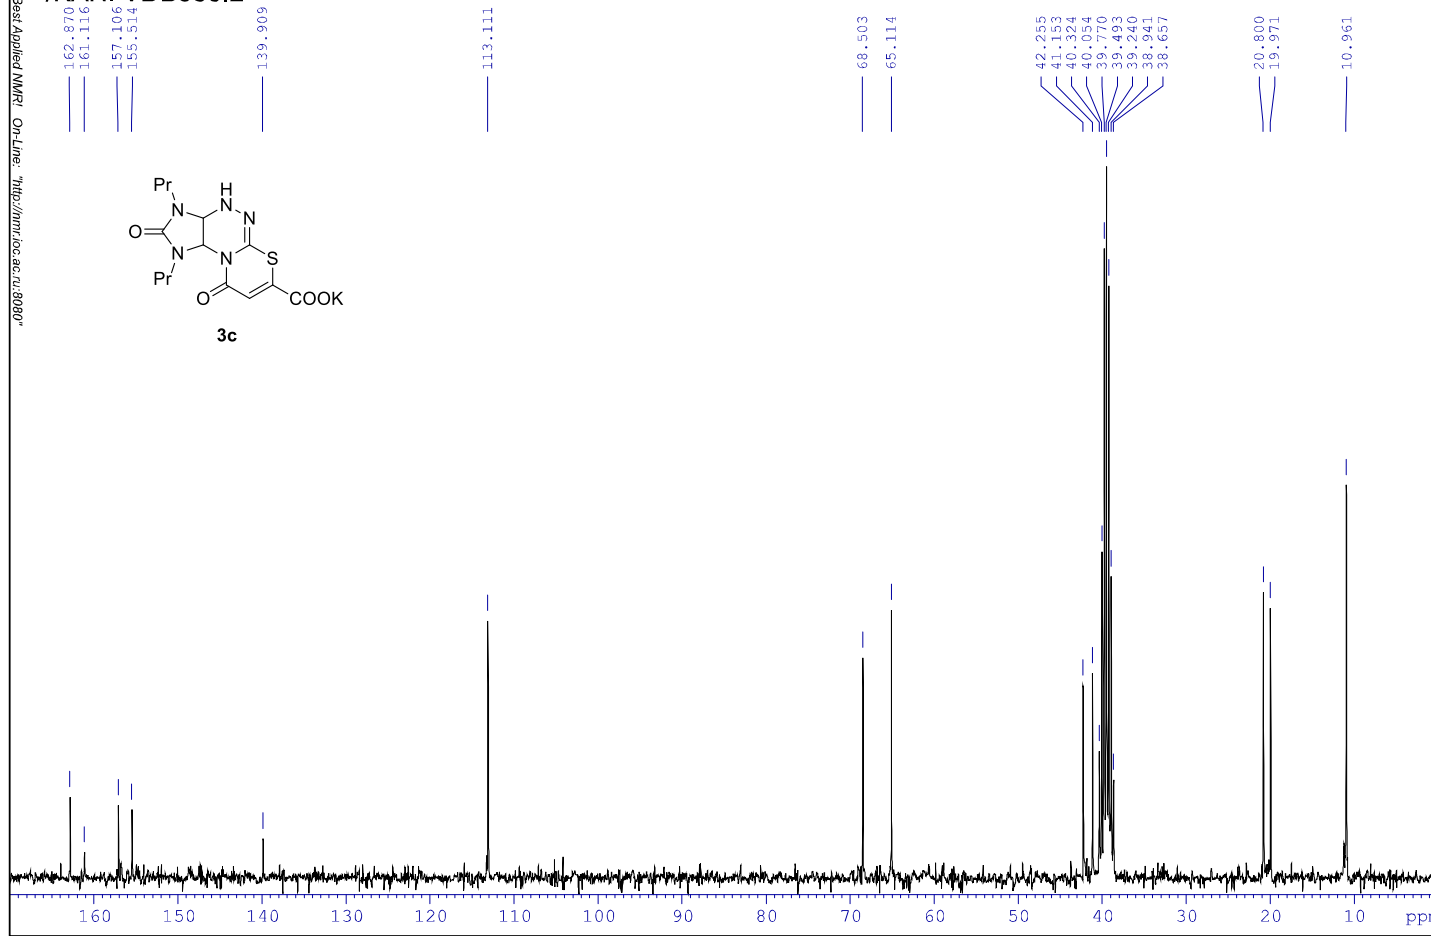

/KANI VDB242.2

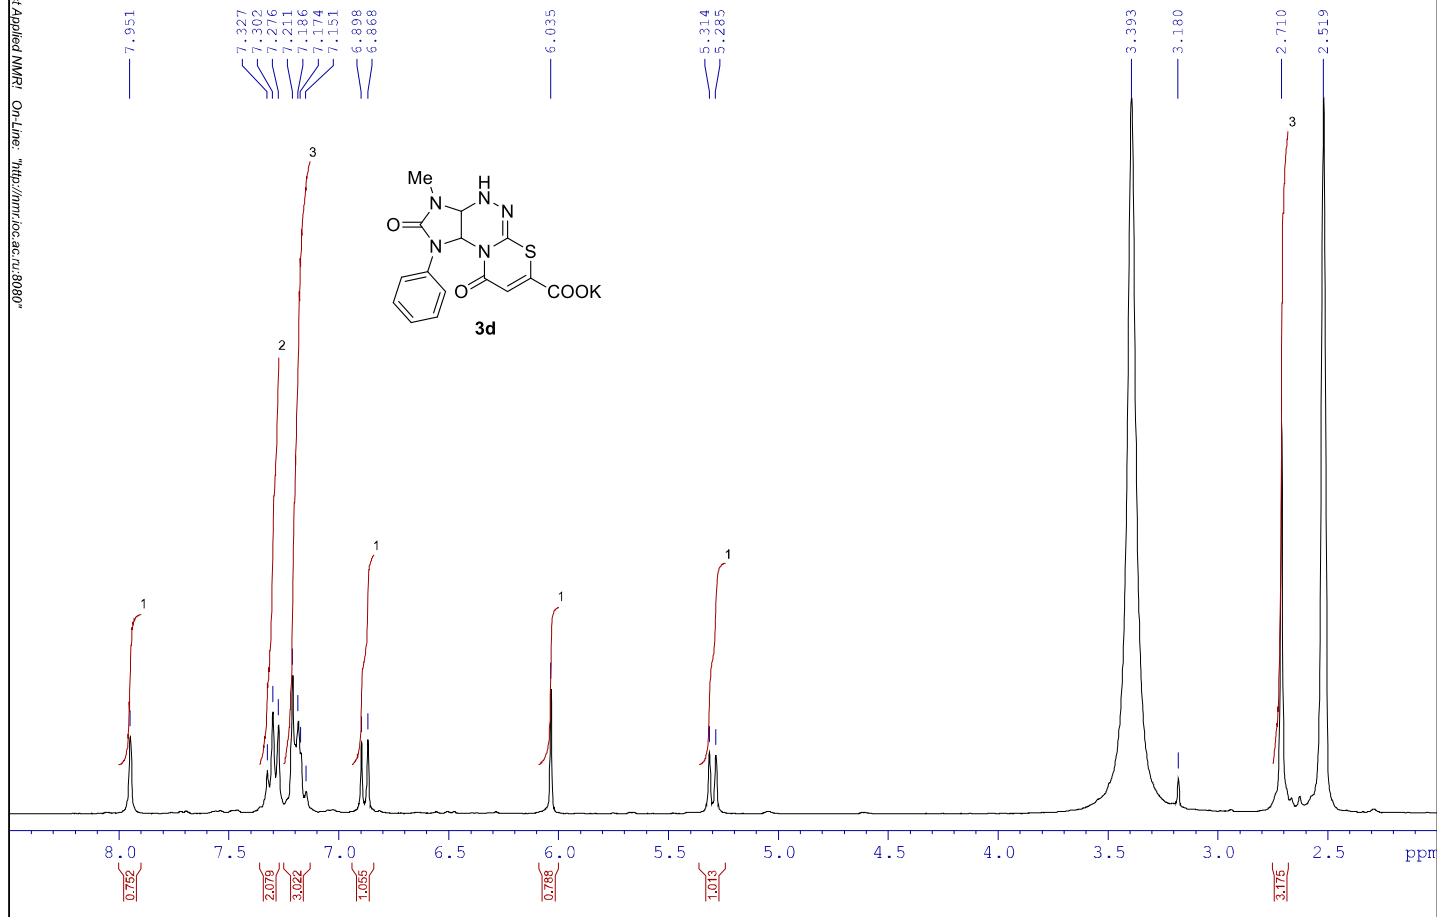

/KANI VDB340.2

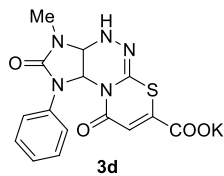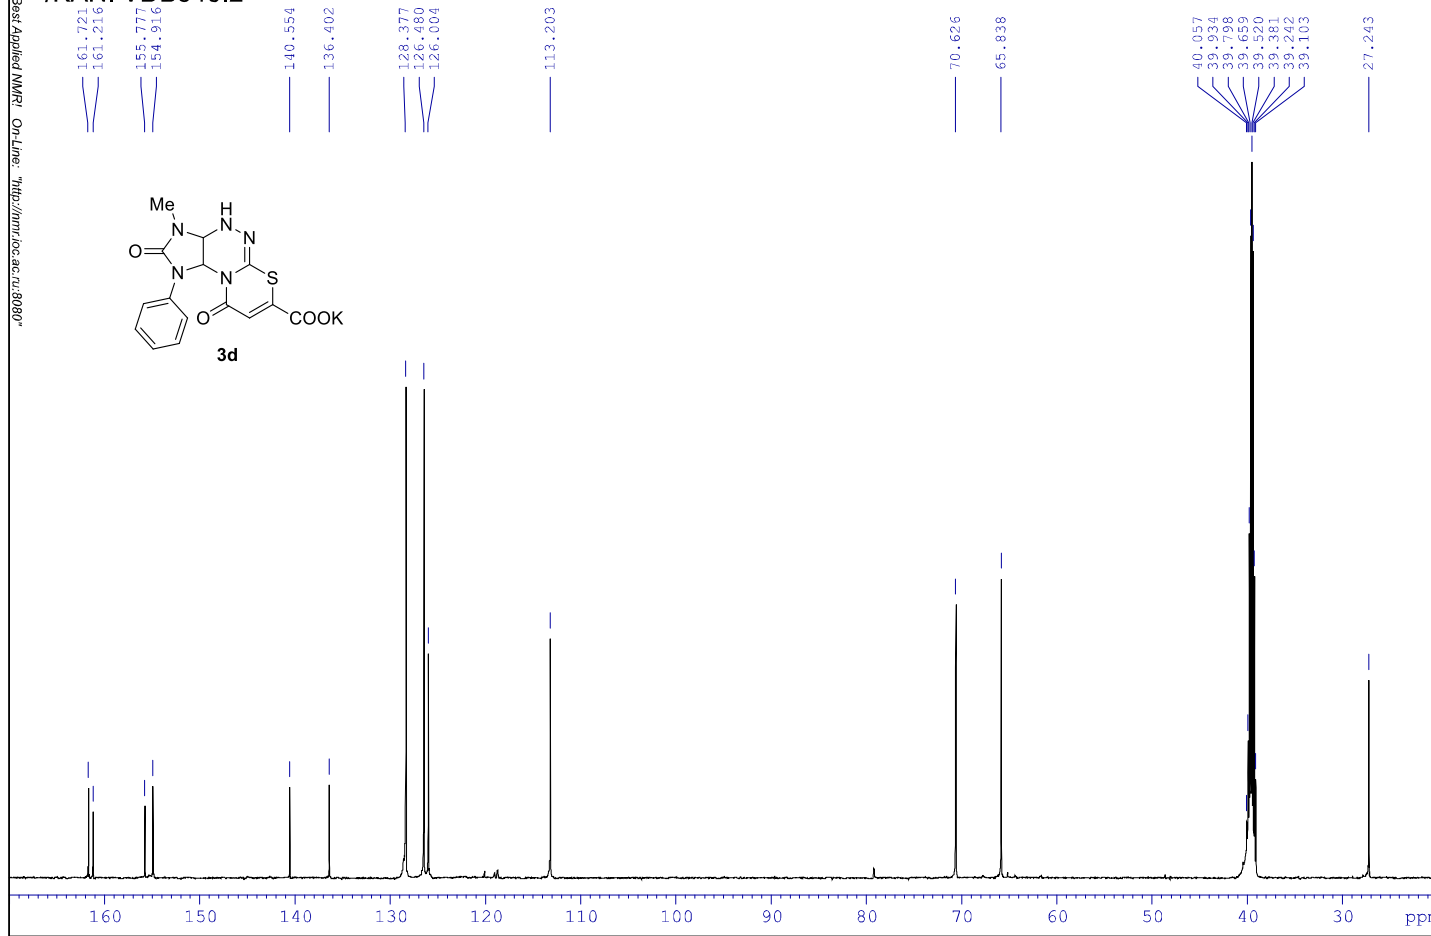

/KANI VDB349.1

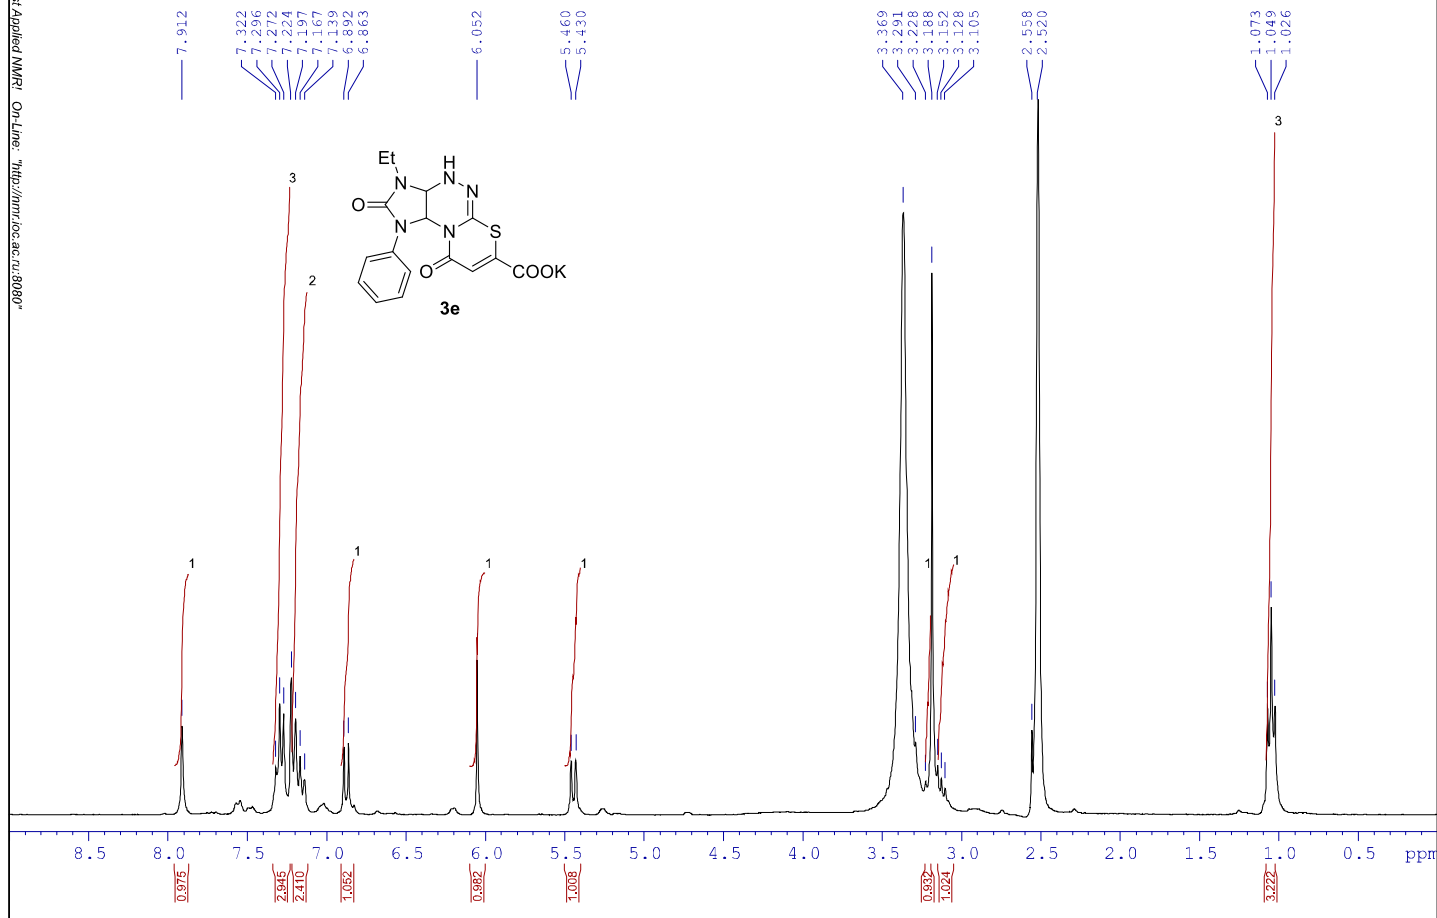

/KANI VDB349.1

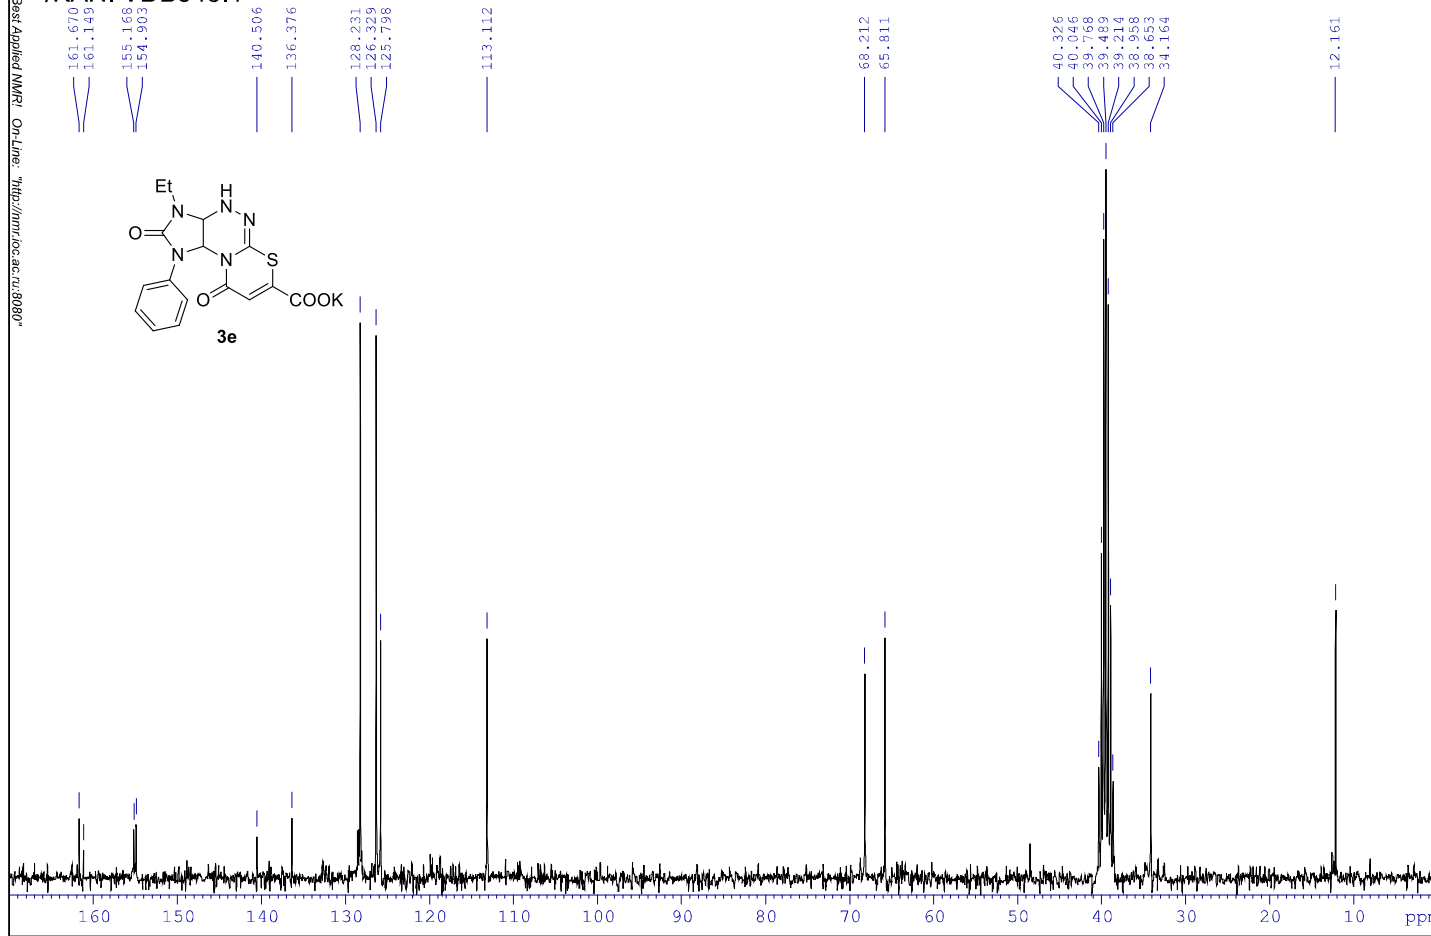

/KANI VDB600.0.4h Gazieva-20074

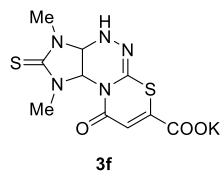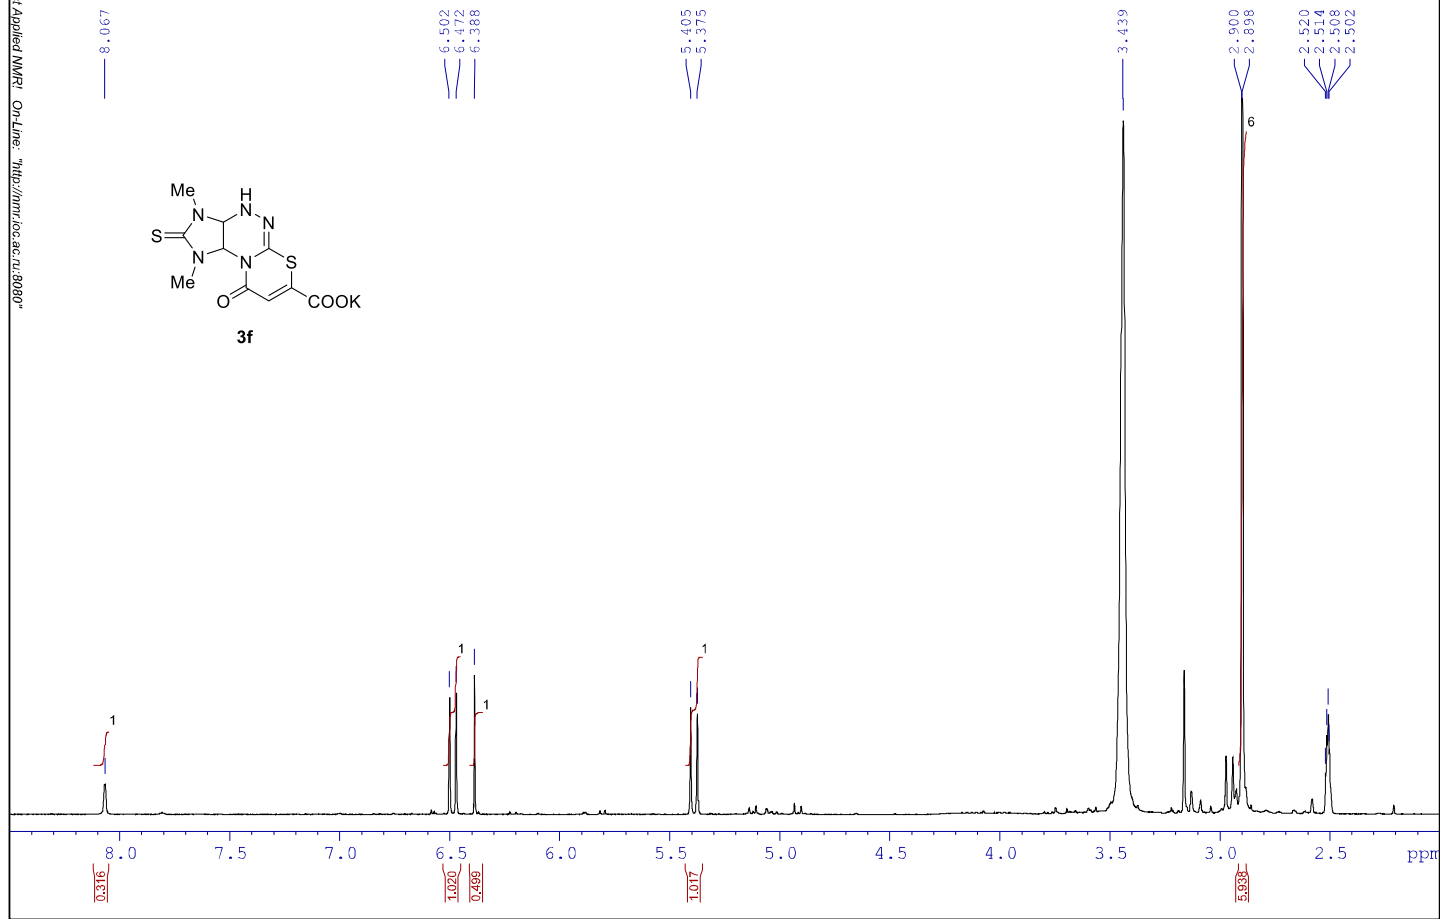

/KANI VDB600.0.4h Gazieva-20074

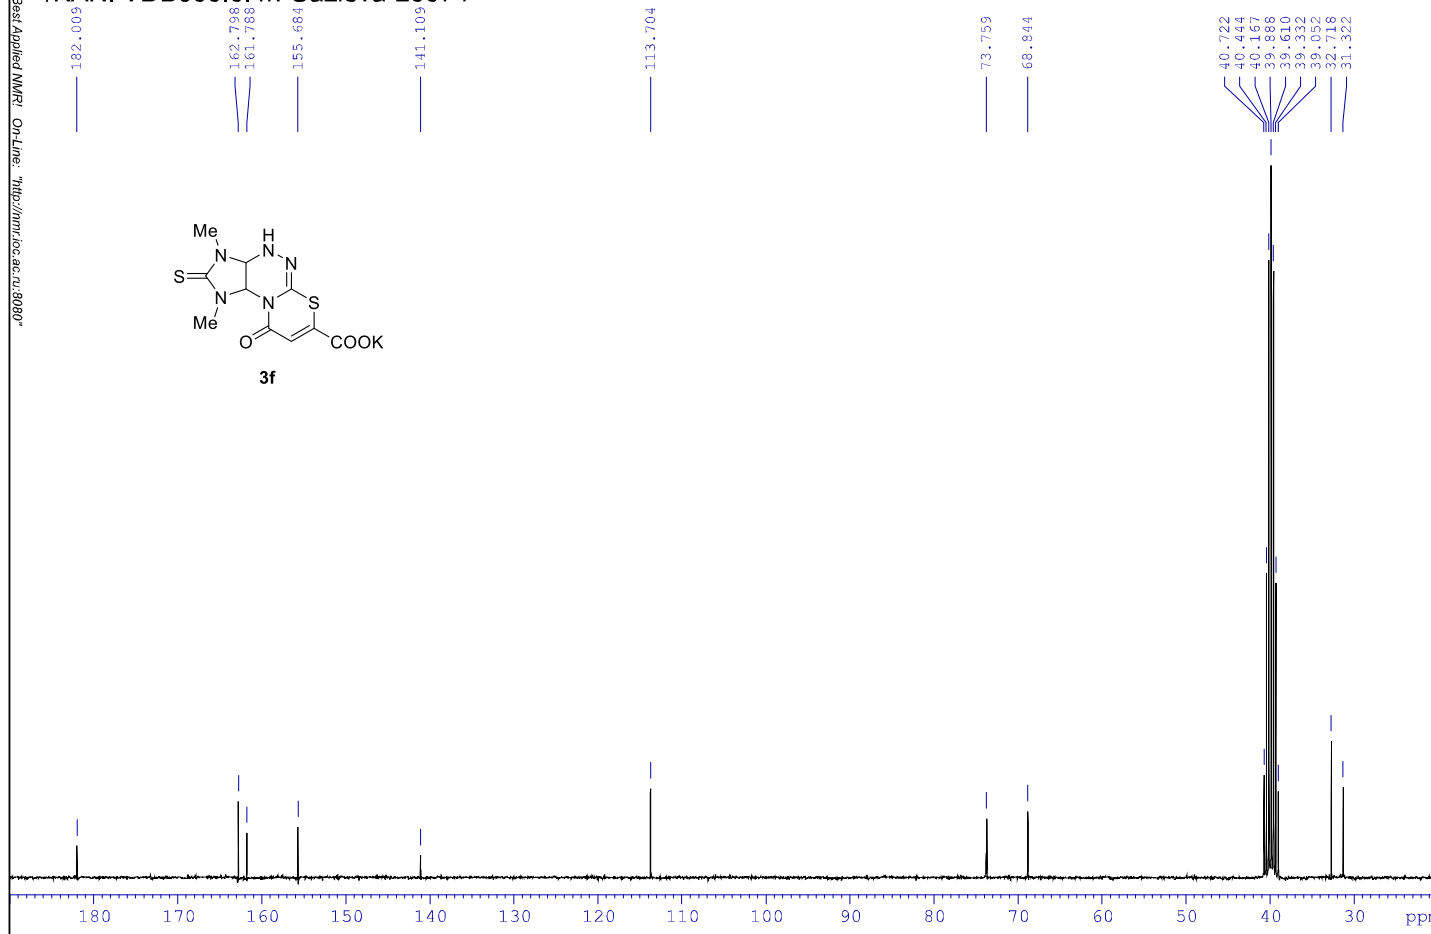



# /KANI VDB345.1

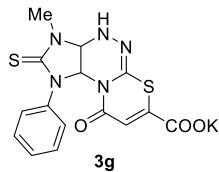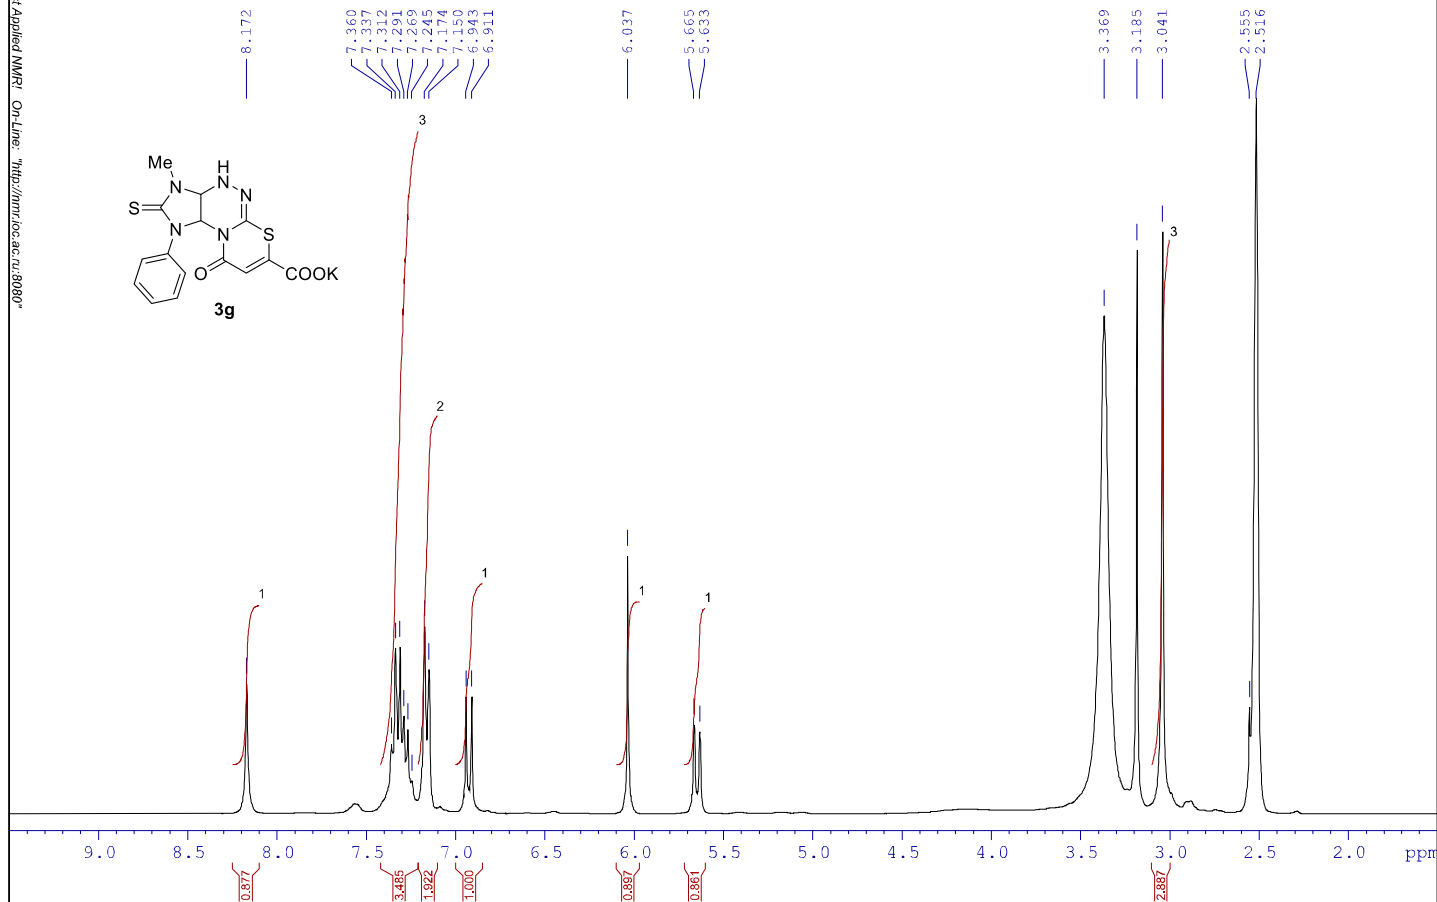

/KANI VDB345.1

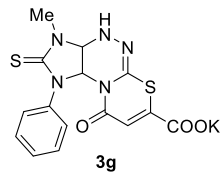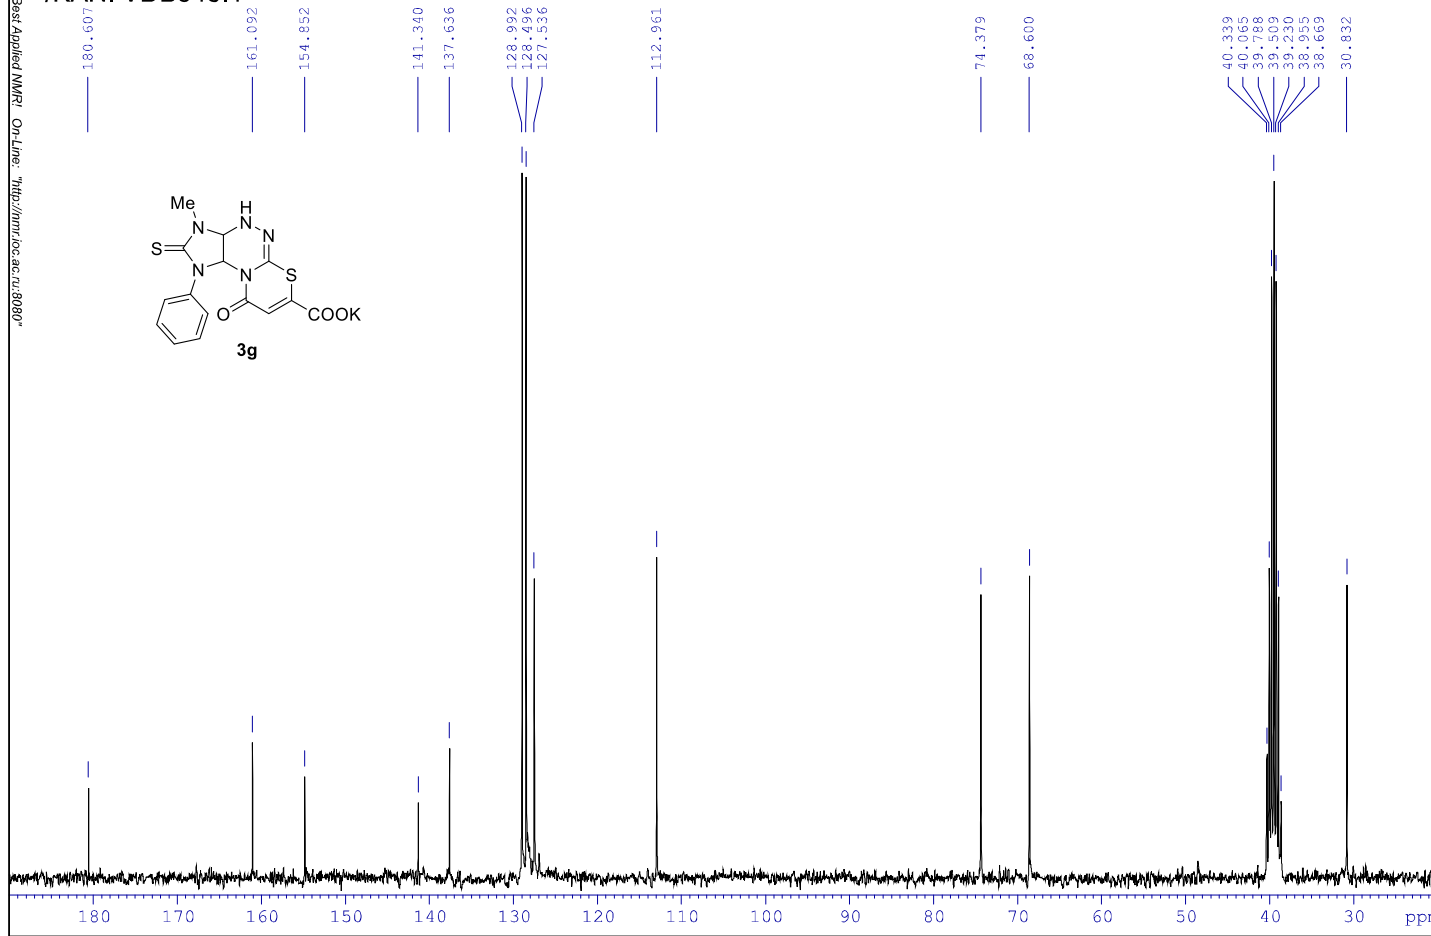

# /KANI VDB357.1 Gazieva-20074

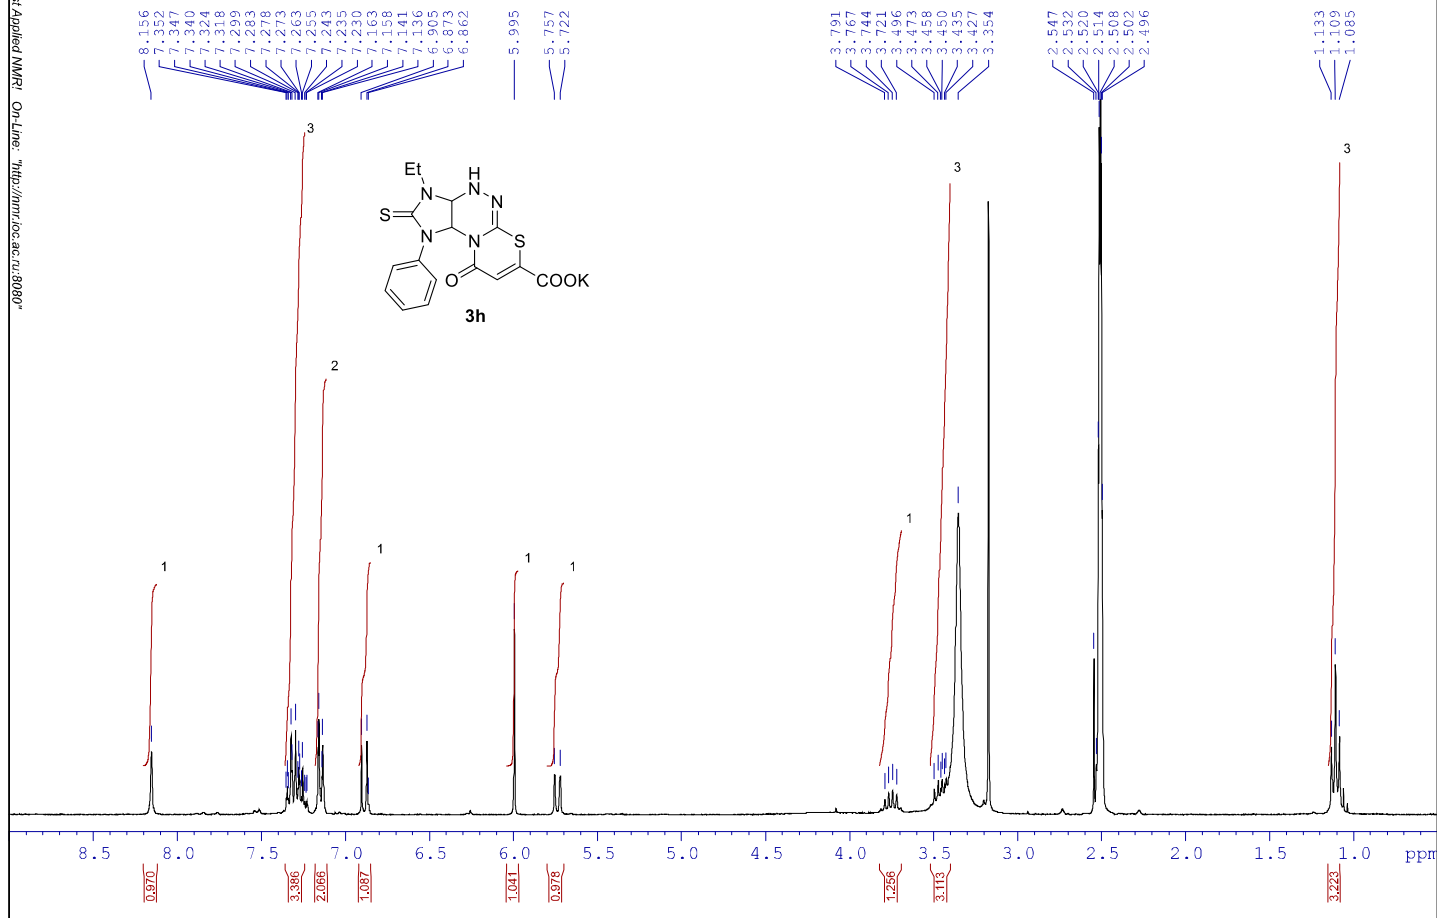

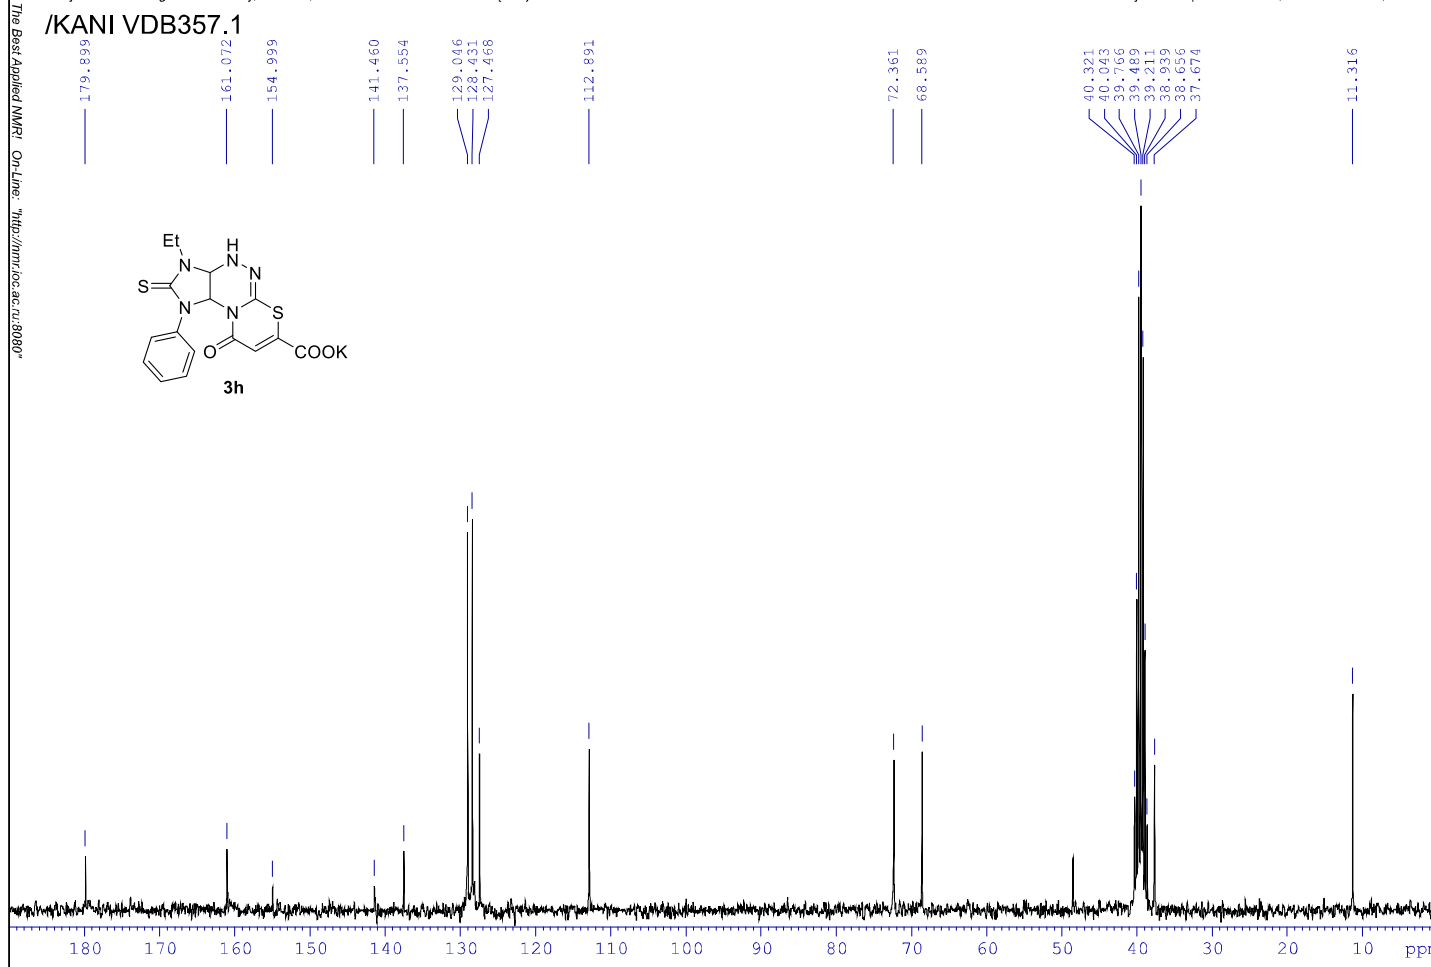

/KANI IA1838.1

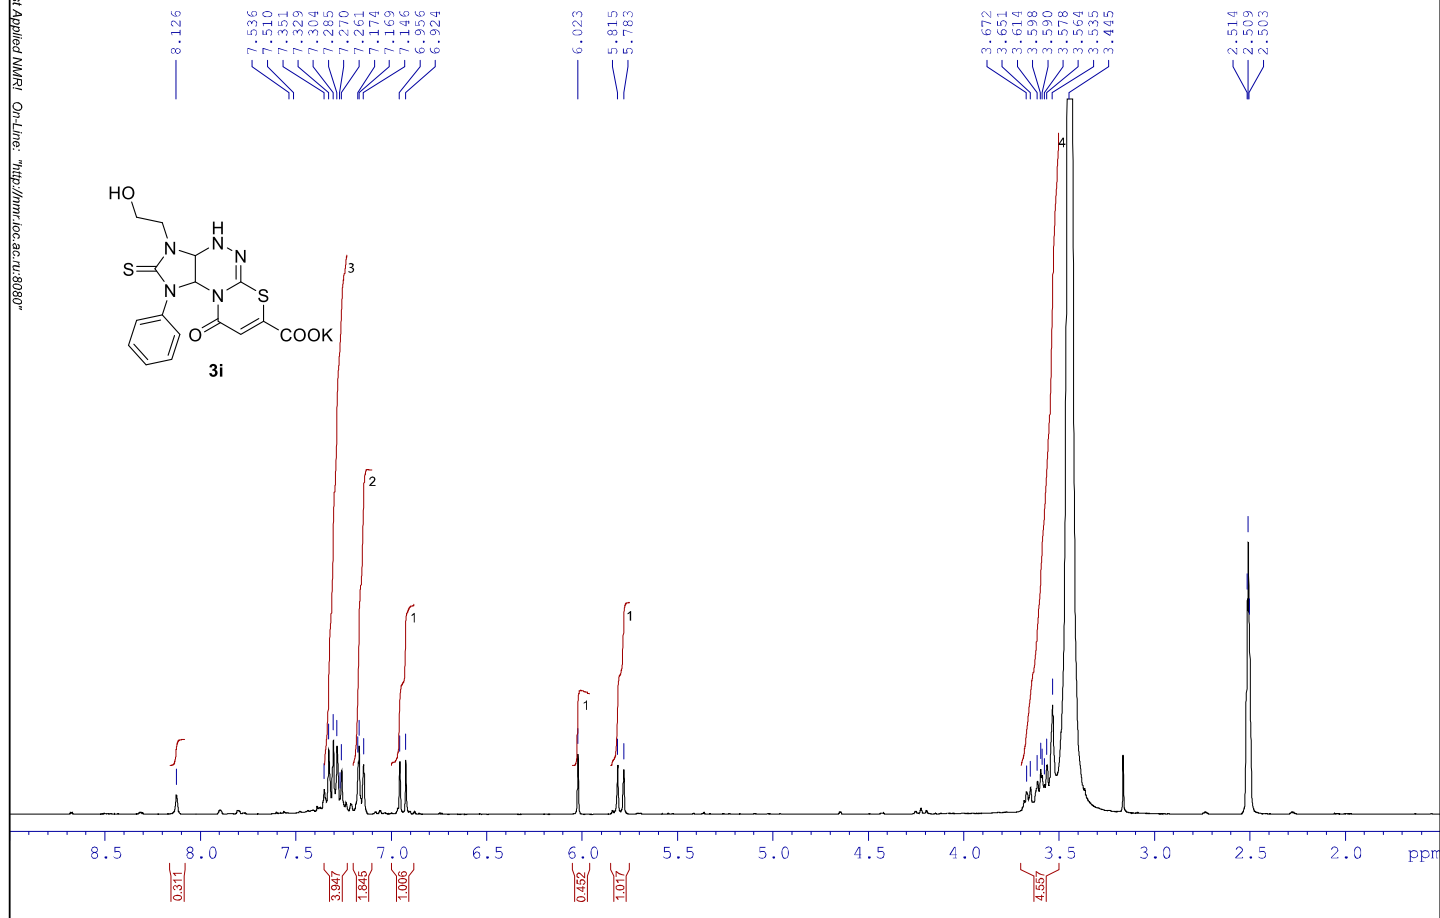

/KANI IA1838.r18

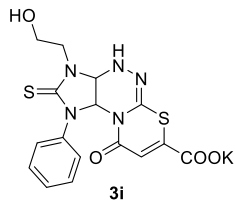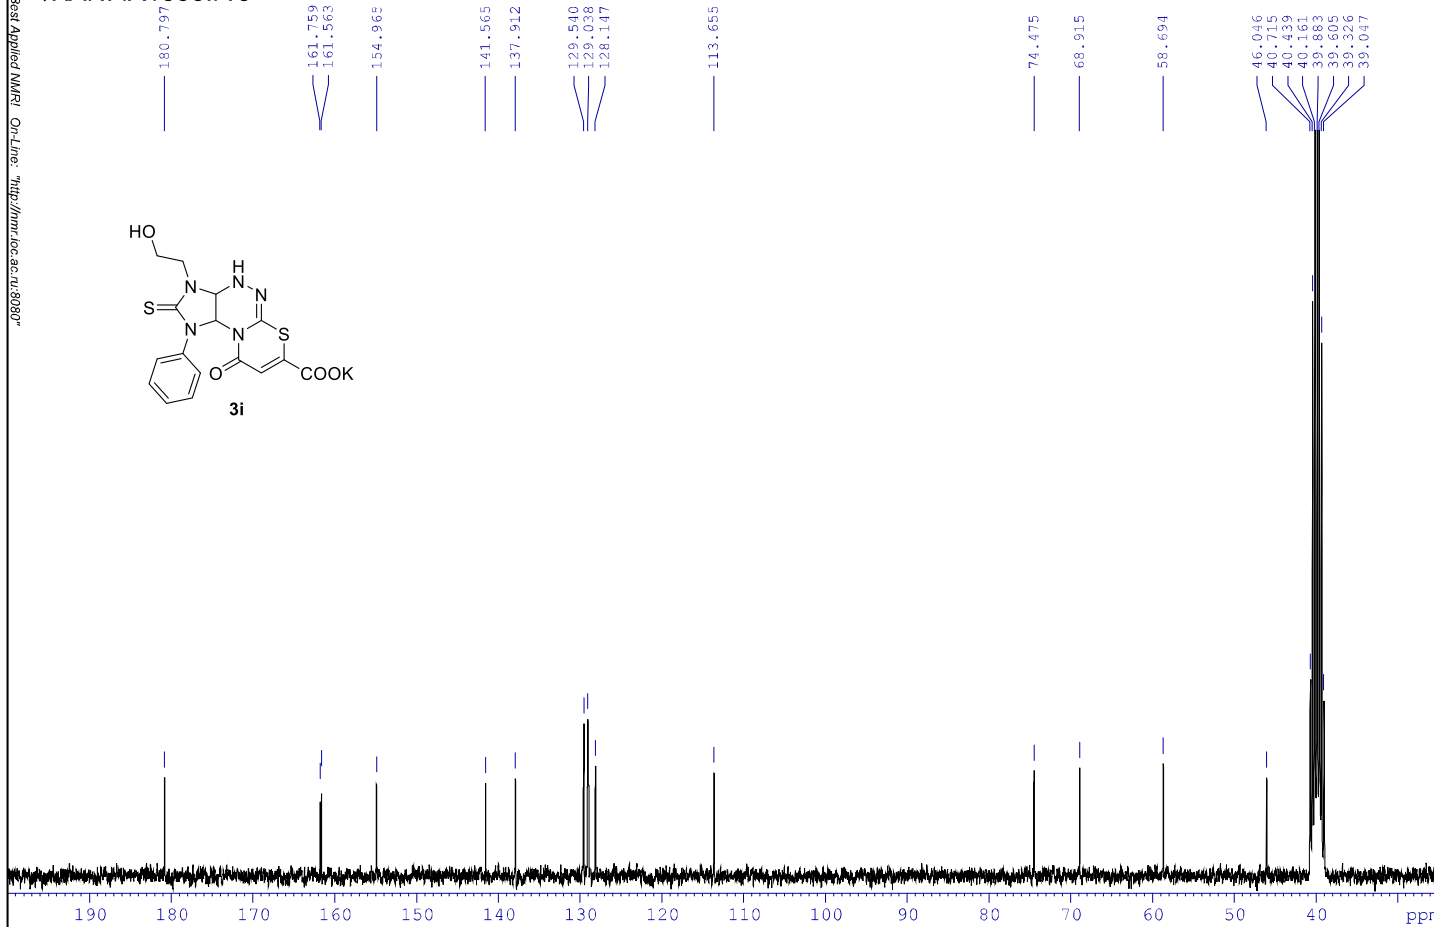

/KANI IA1842.1

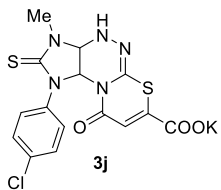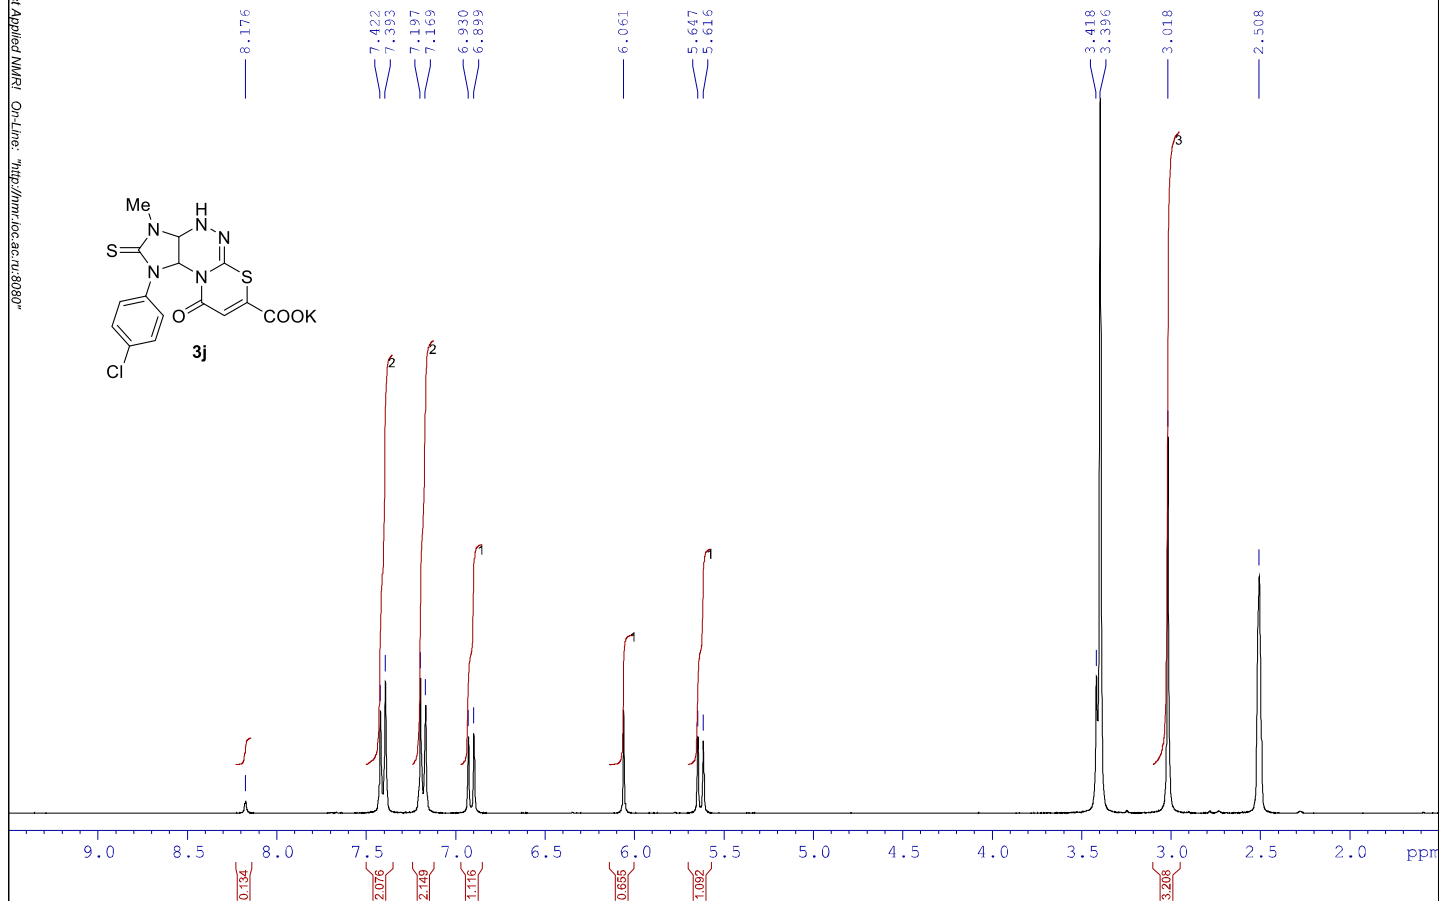

/KANI IA1842.r18

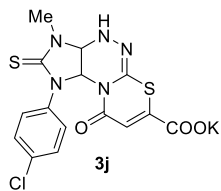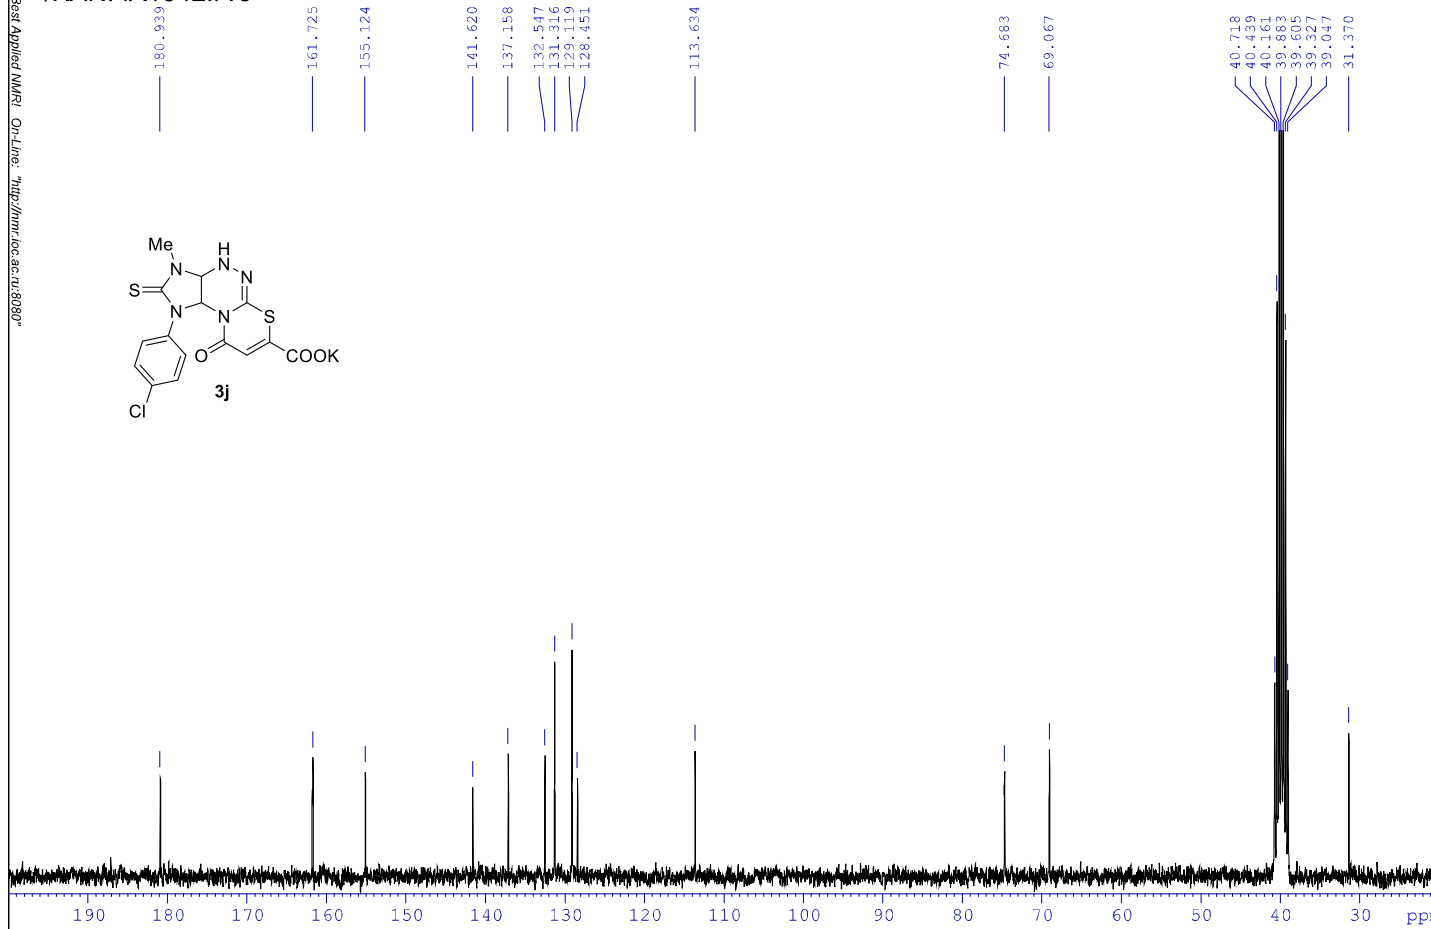



/KANI VDB593.1.1 Gazieva-20074

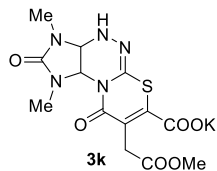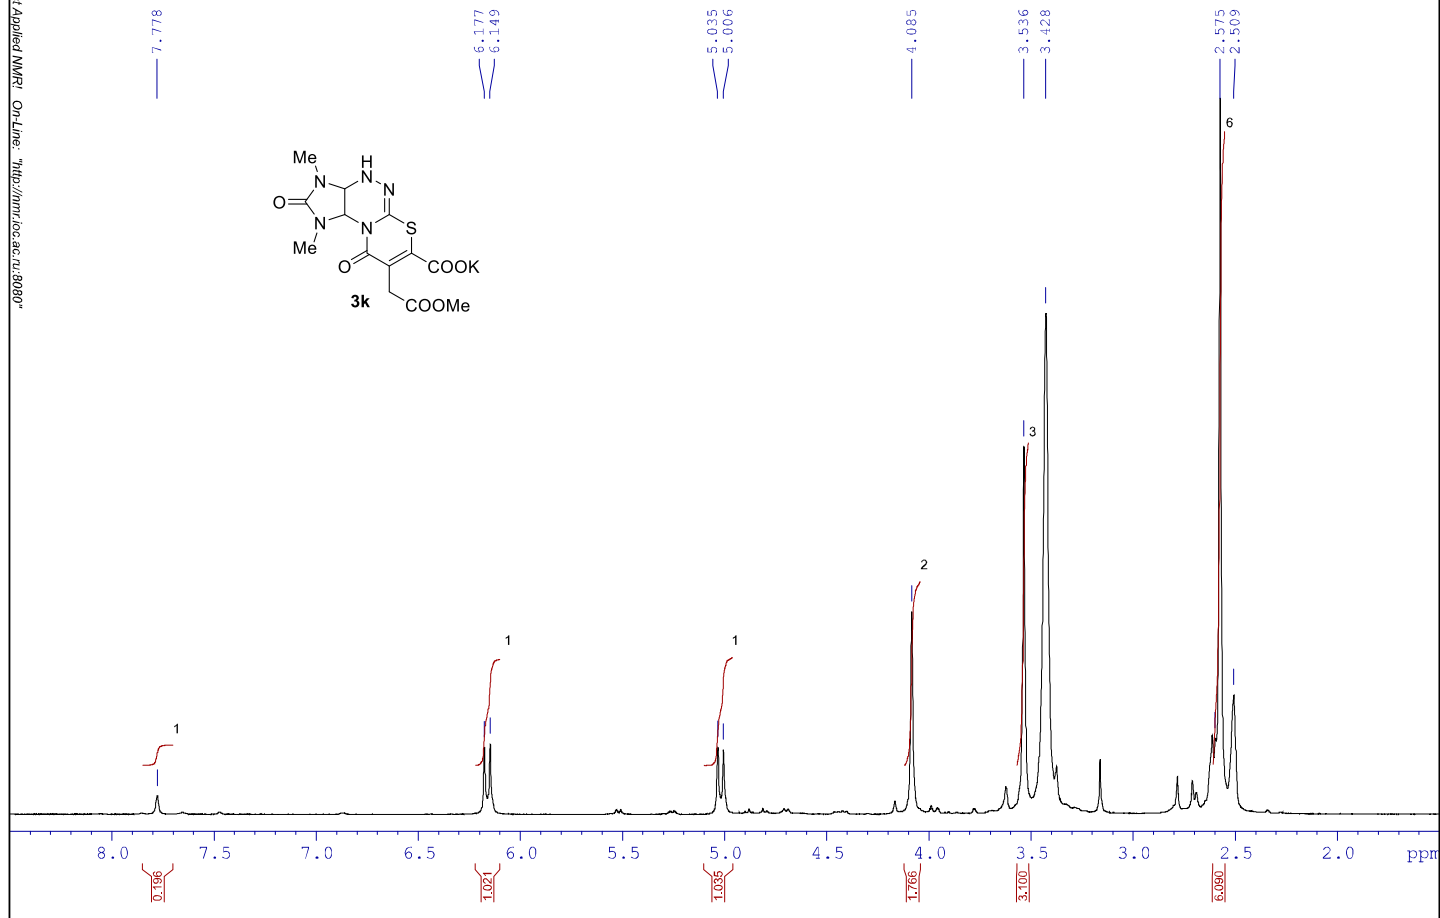

/KANI VDB593.1.1 Gazieva-20074

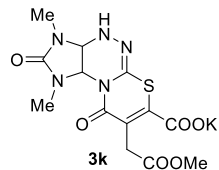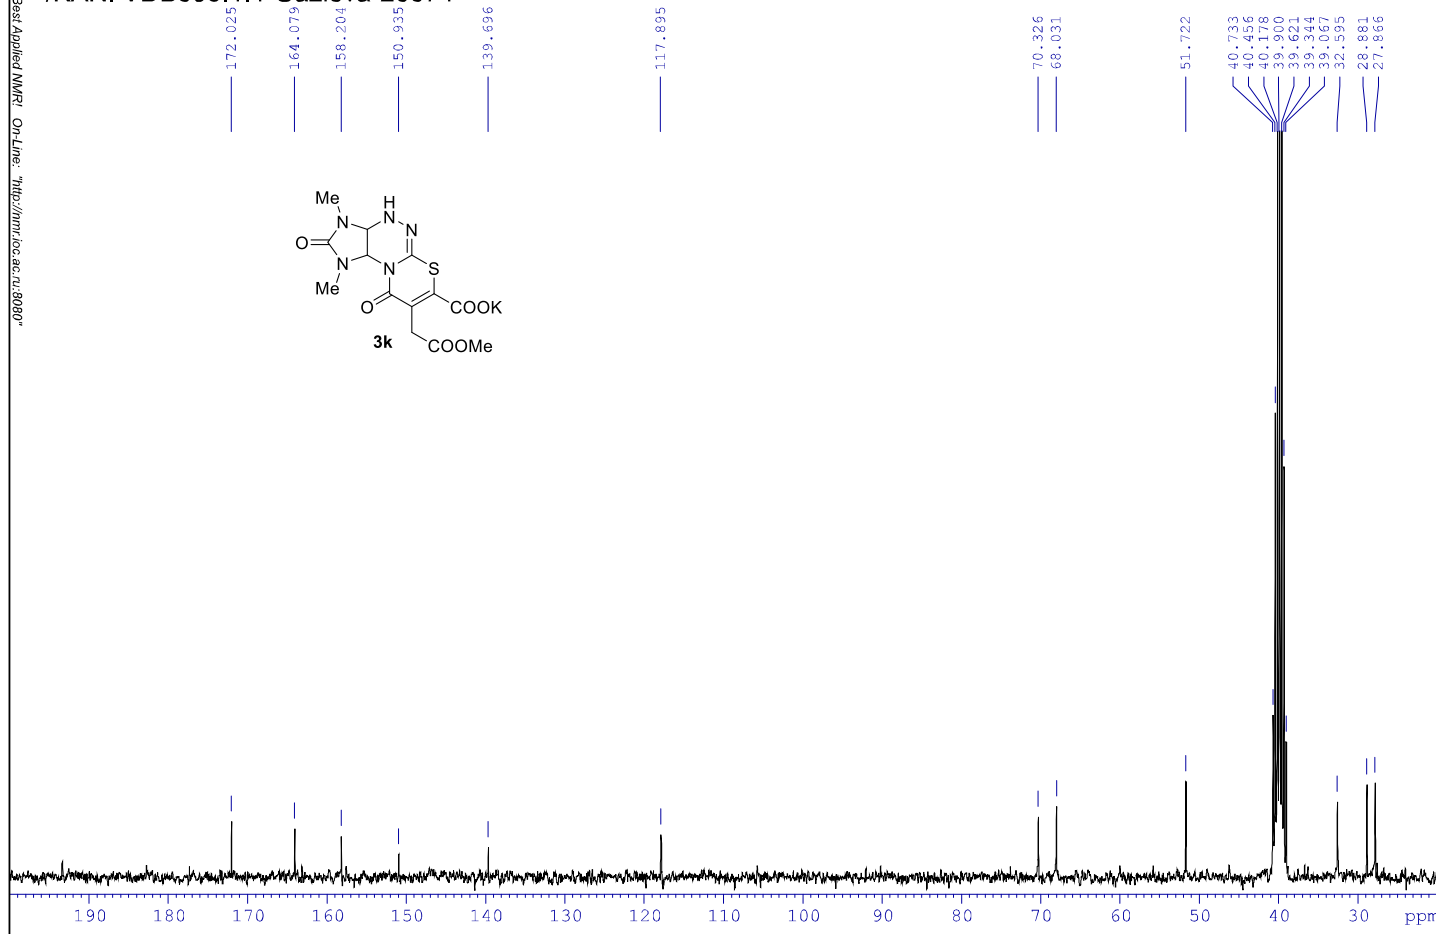

/KANI VDB593.1.1 Gazieva-20074  
HMBP

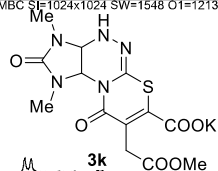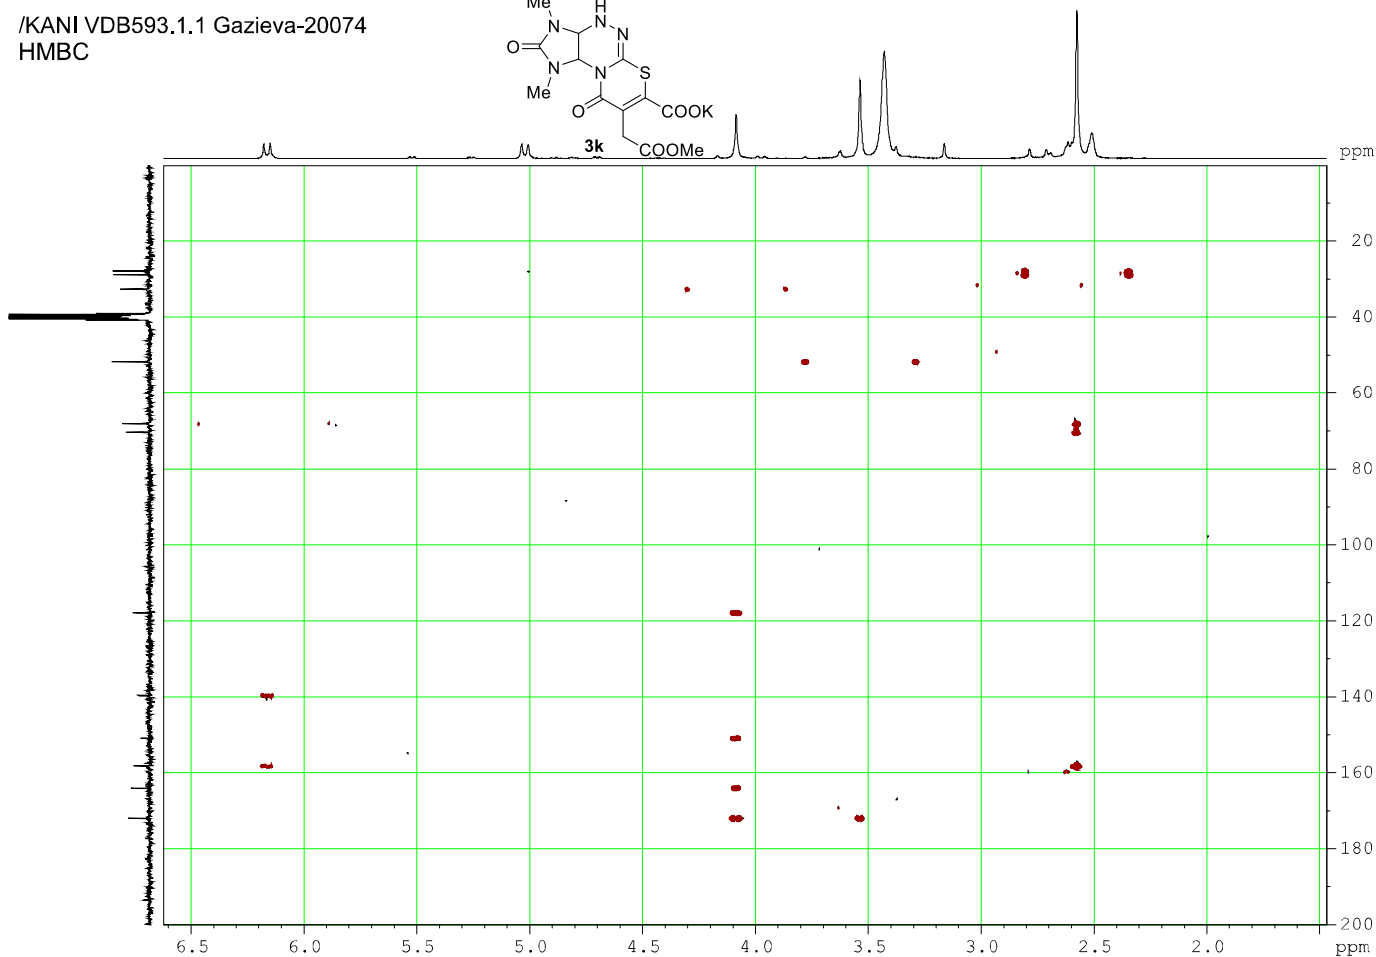

/KANI VDB603.0.K Gazieva-20074

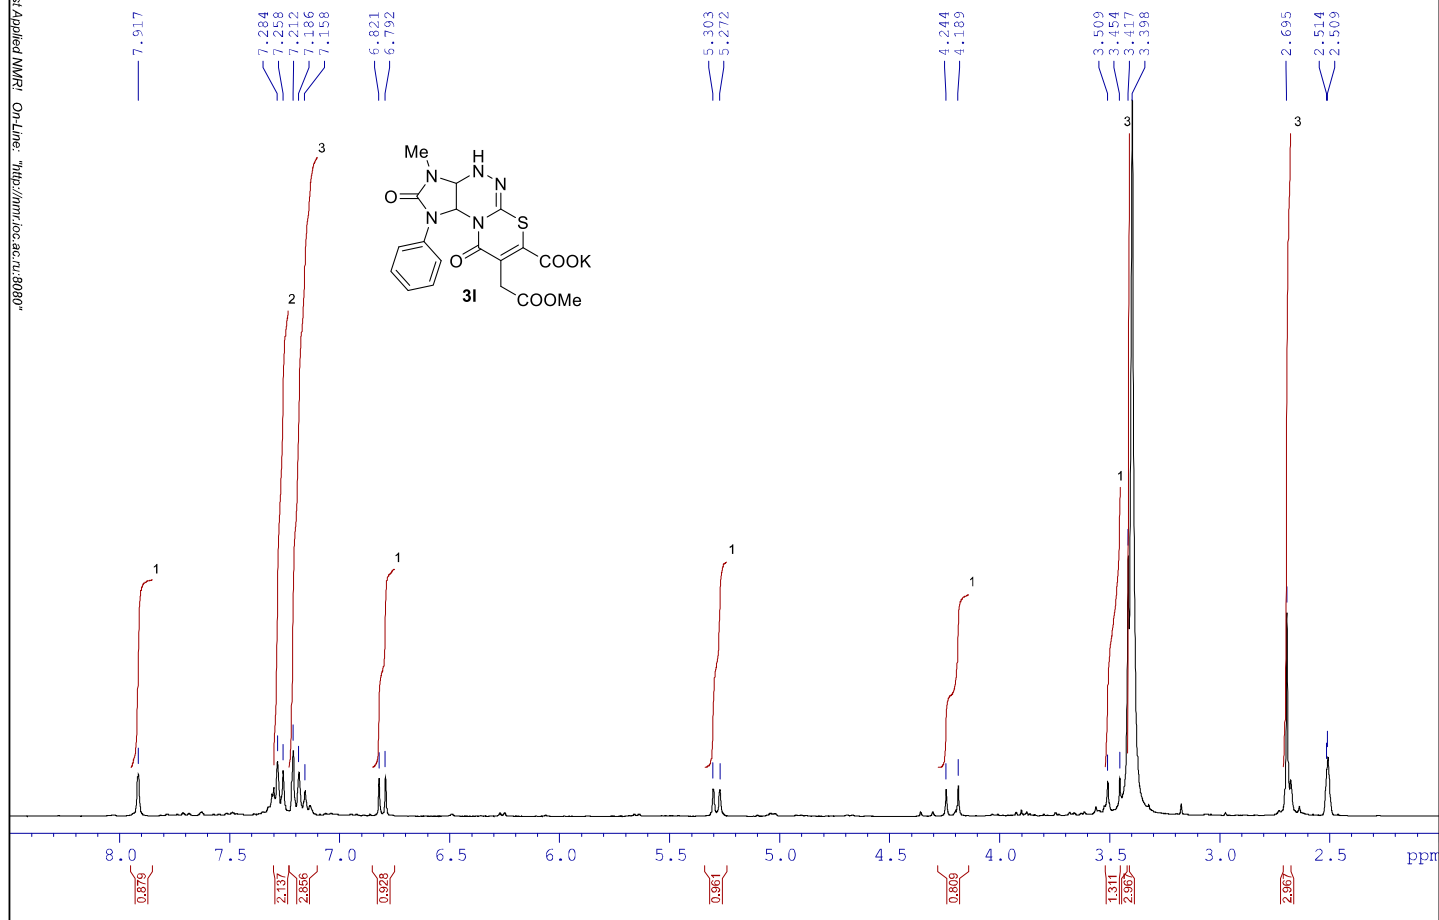

/KANI VDB603.0.K Gazieva-20074

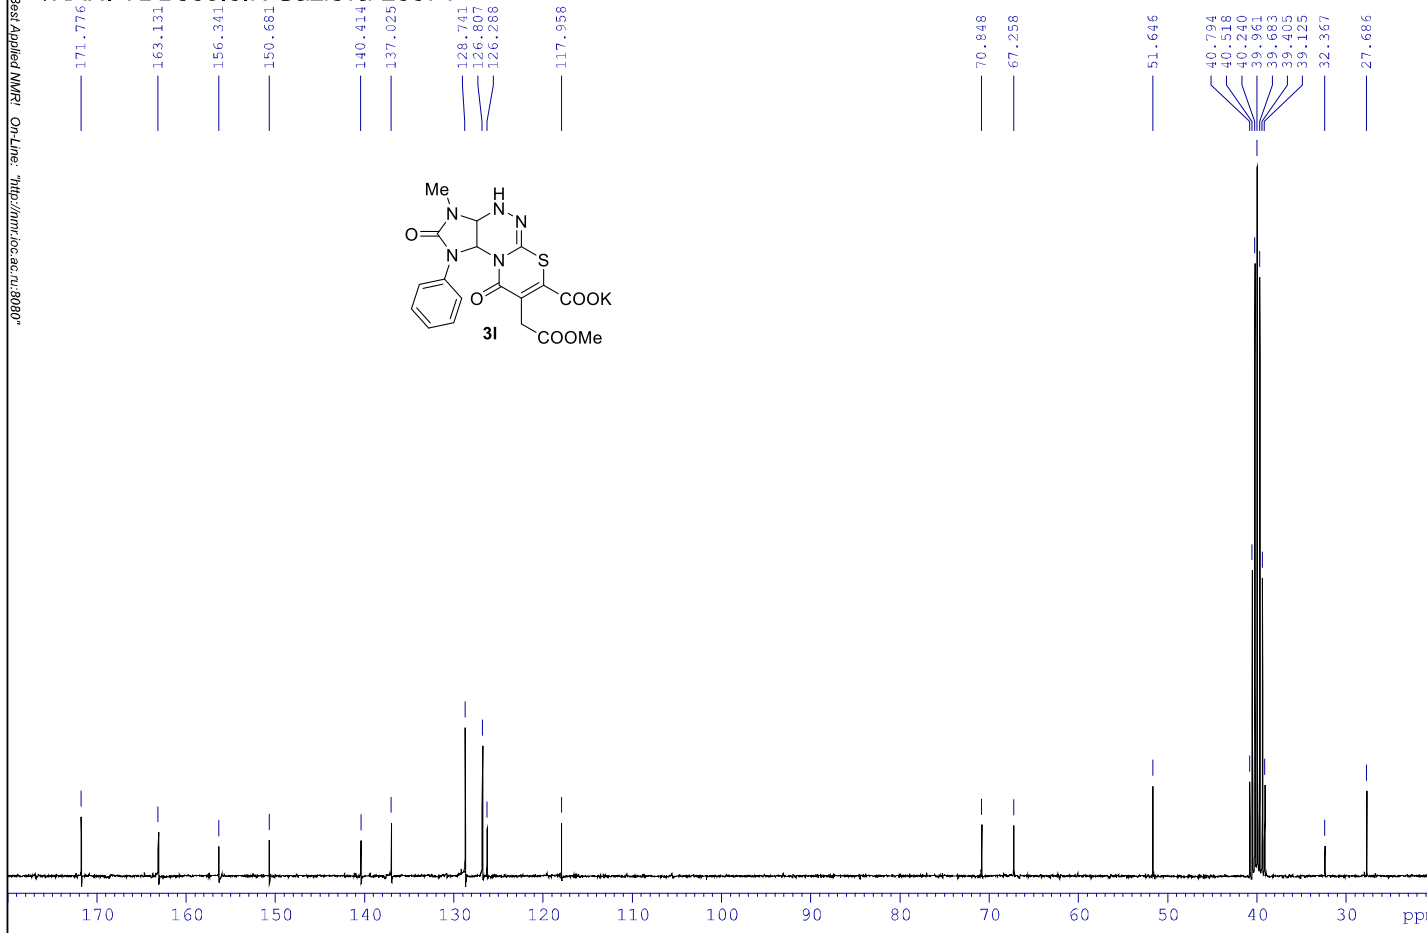

/KANI VDB596.0.K Gazieva-20074

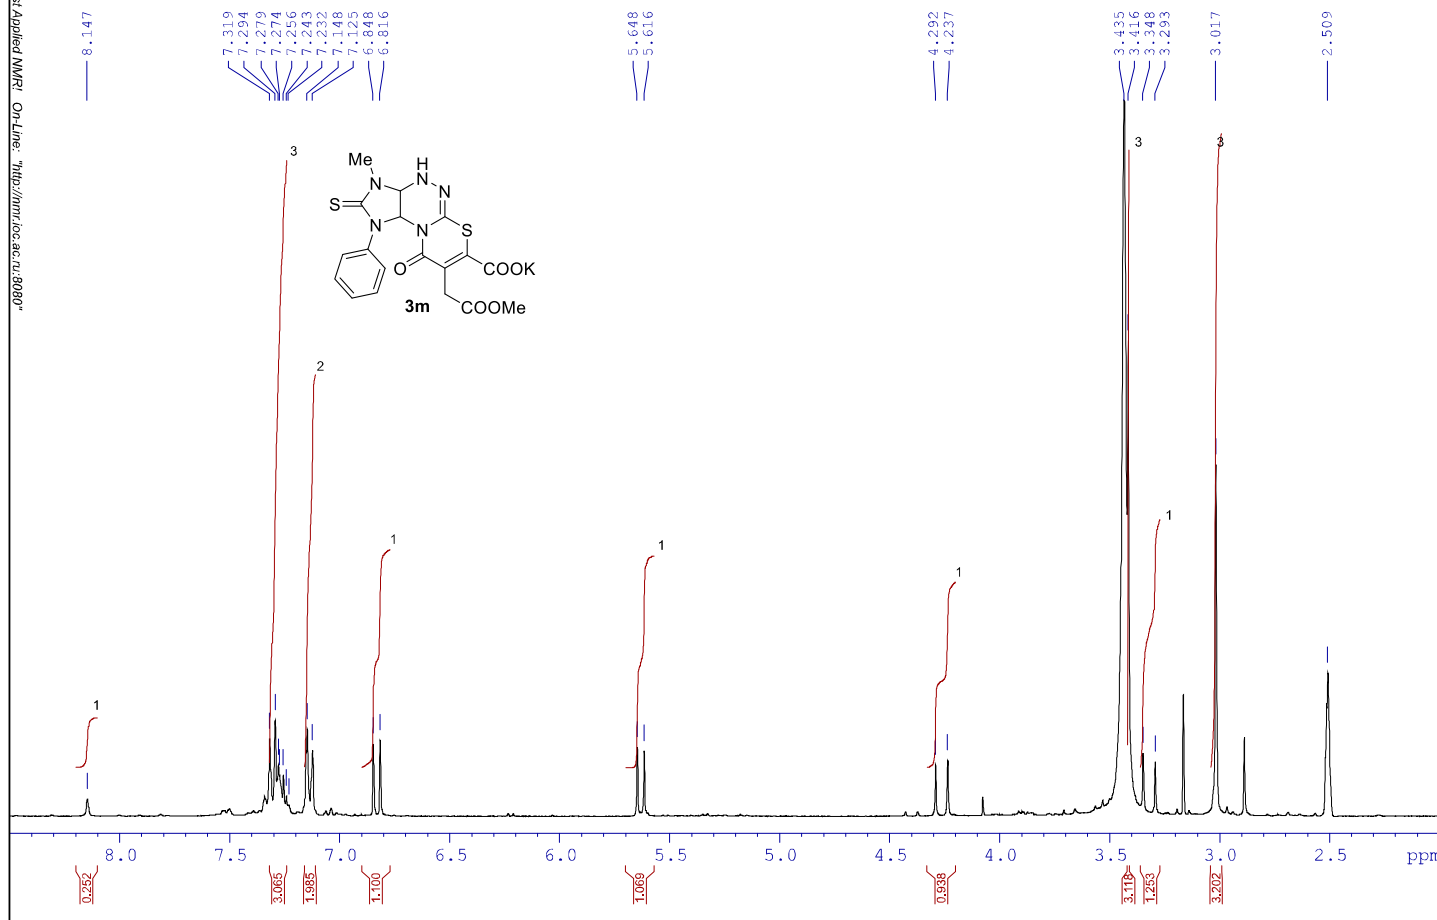

/KANI VDB596.0.K Gazieva-20074

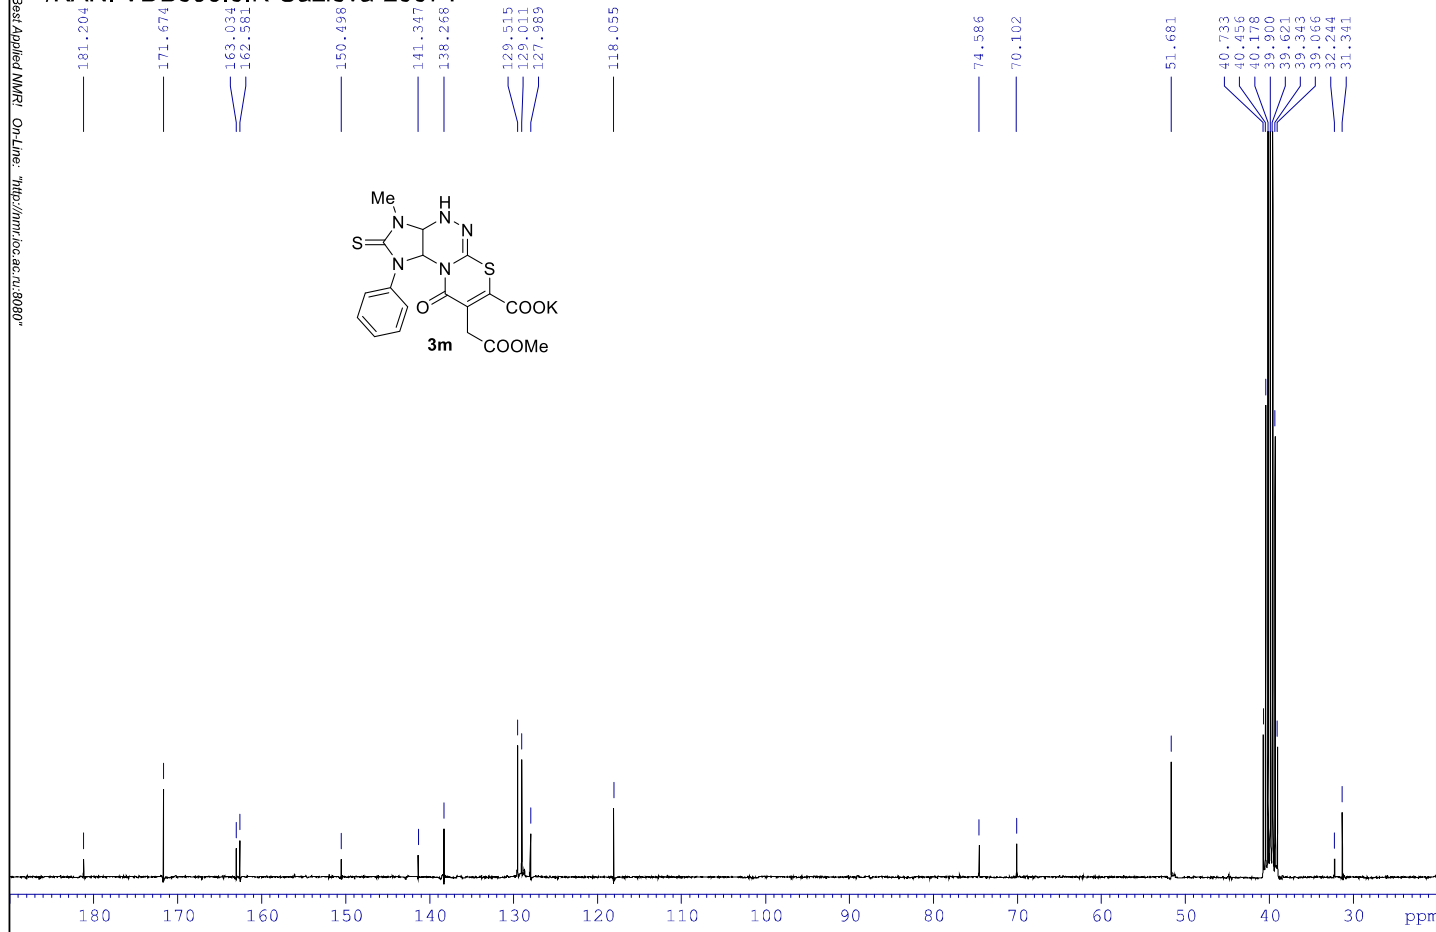

/KANI IA1417

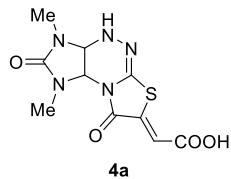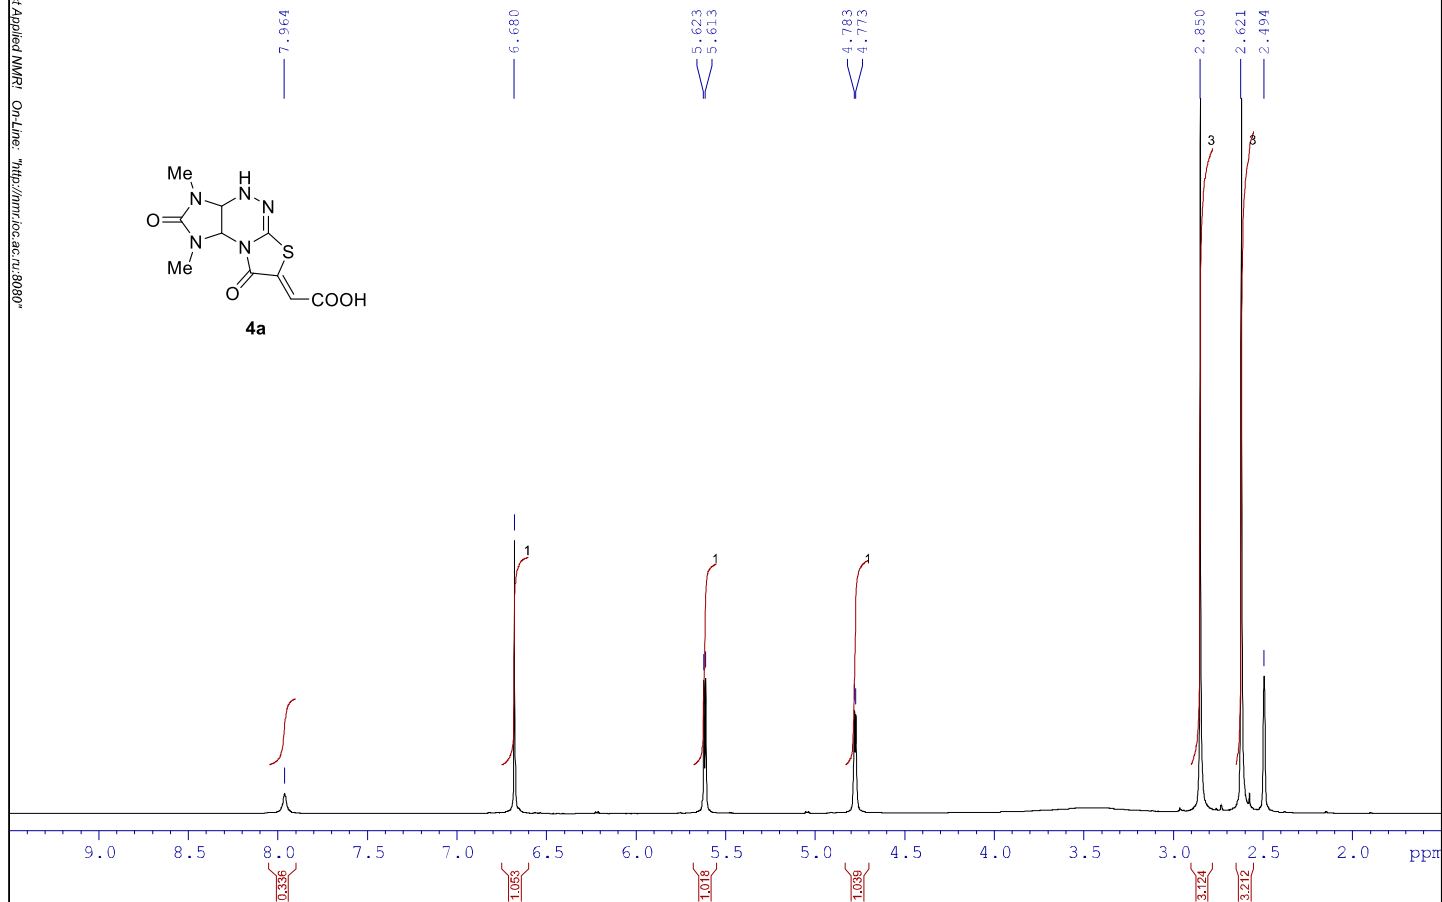



/KANI IA1417

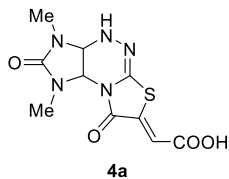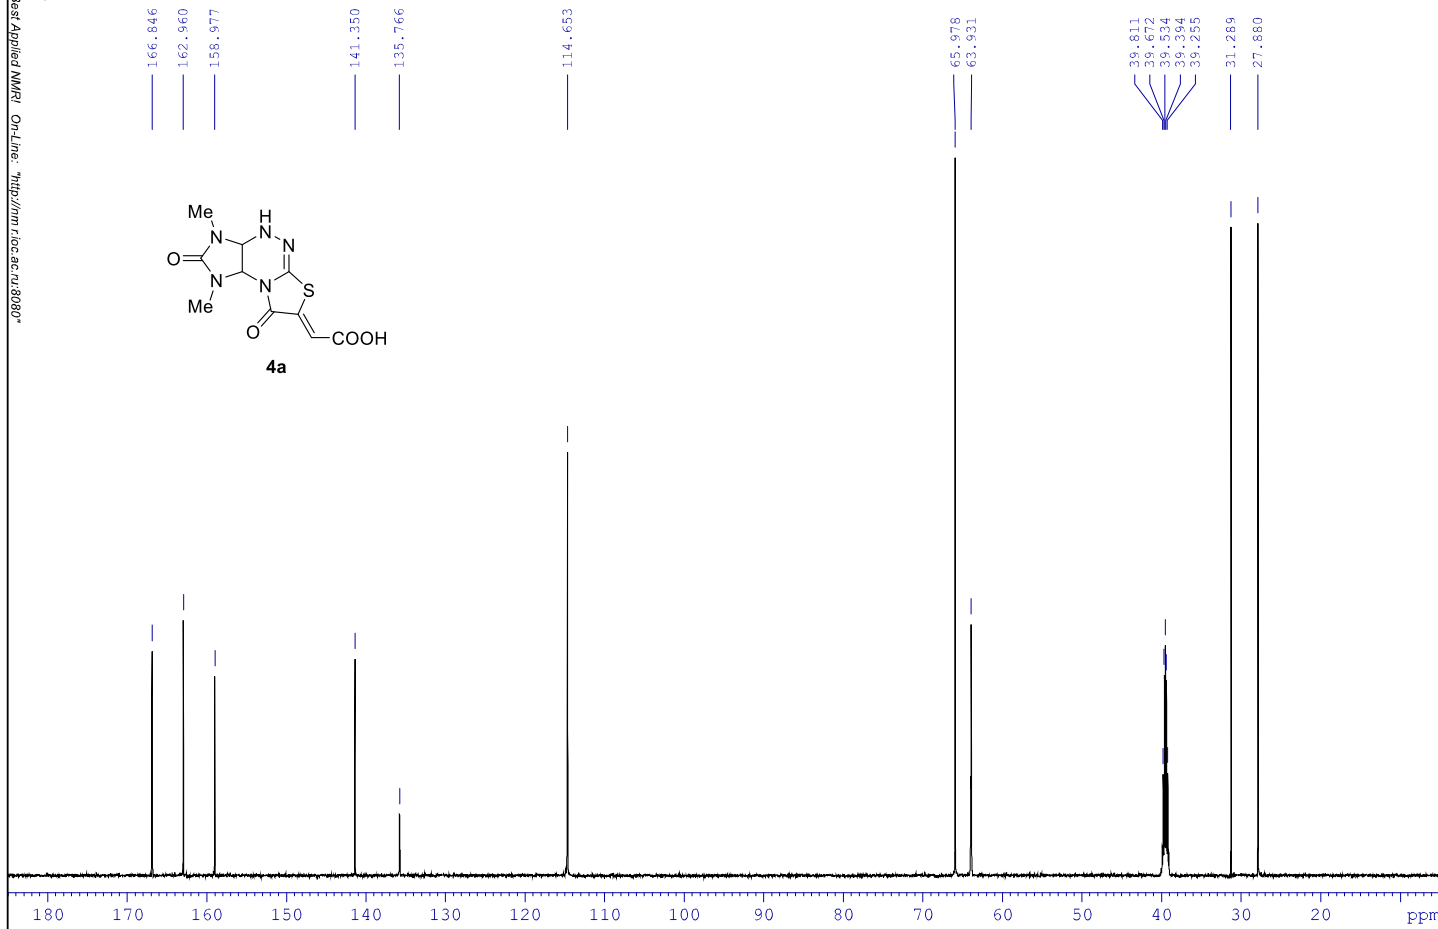

# /KANI IA1417 {1H-13C} HMBC

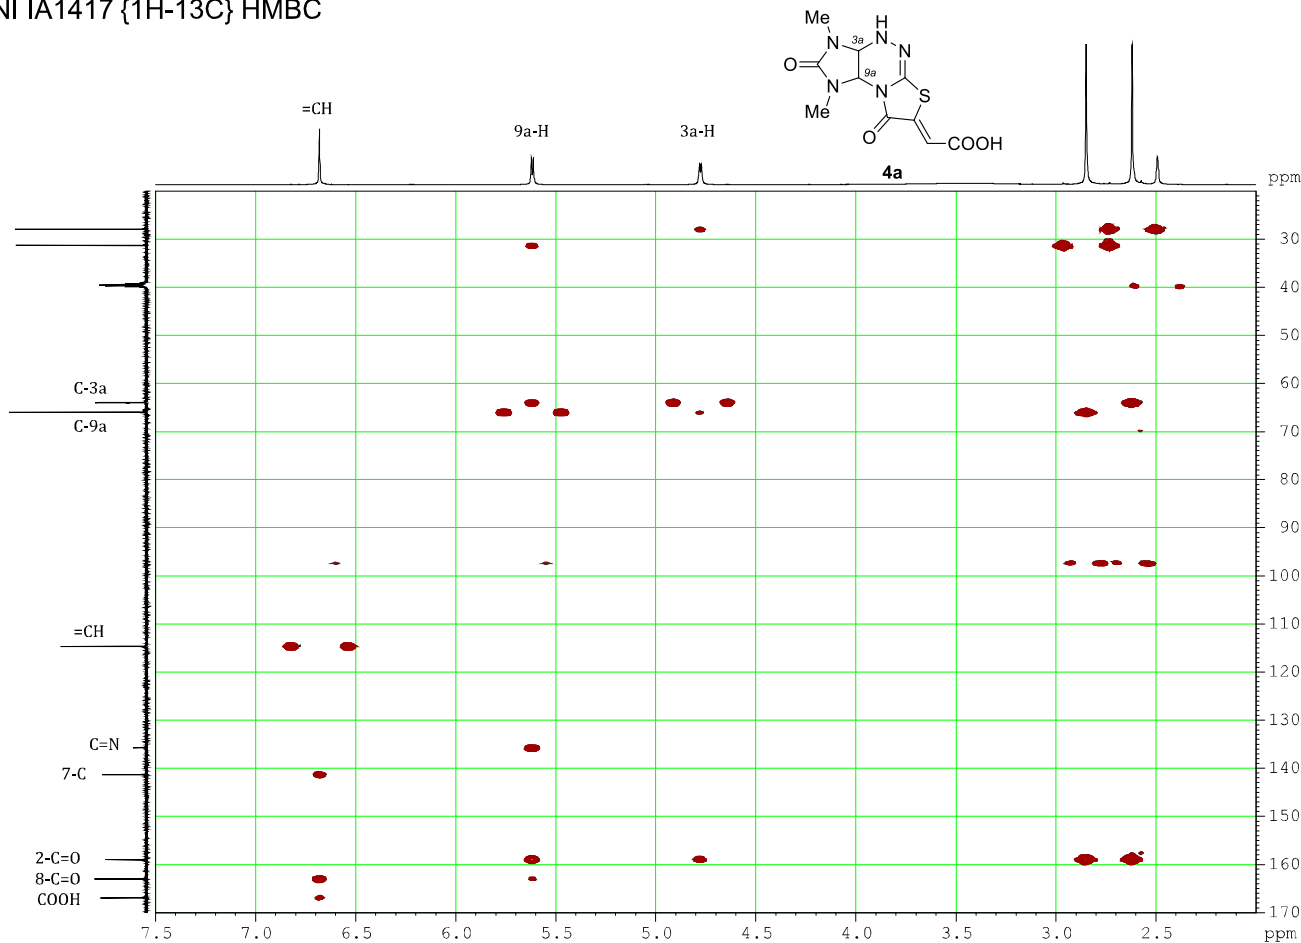

/KANI VDB85.1

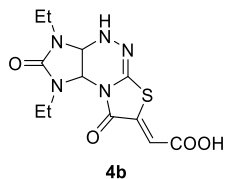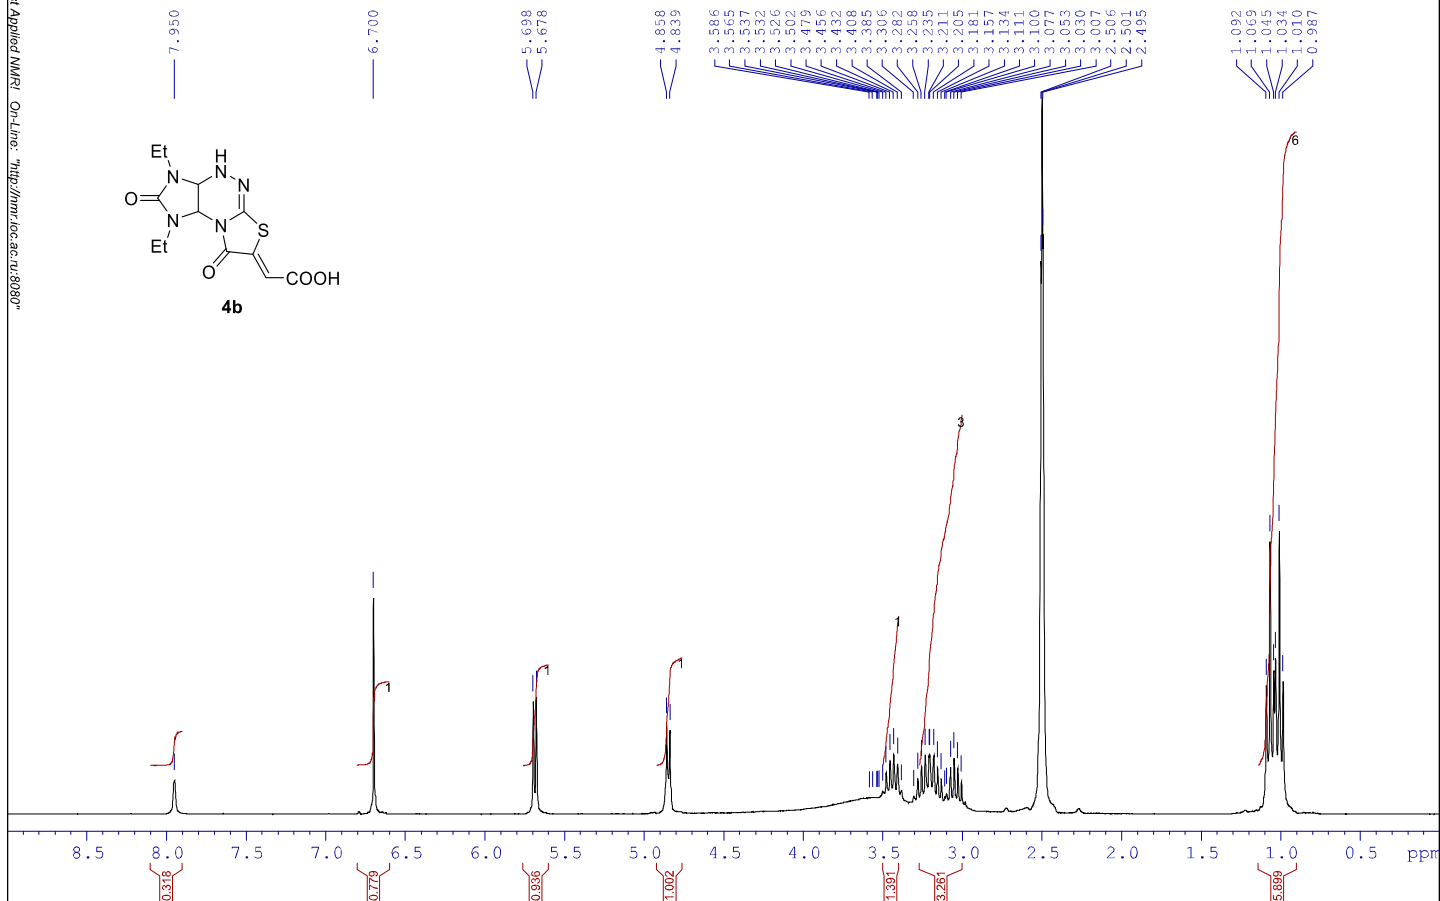

/KANI VDB85.1

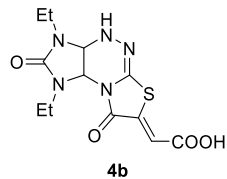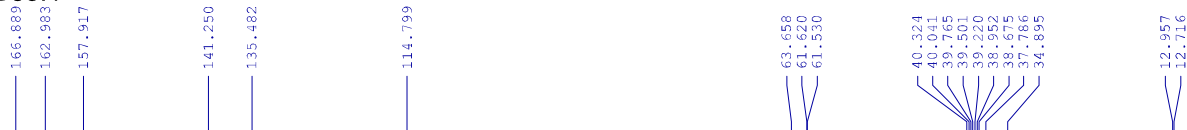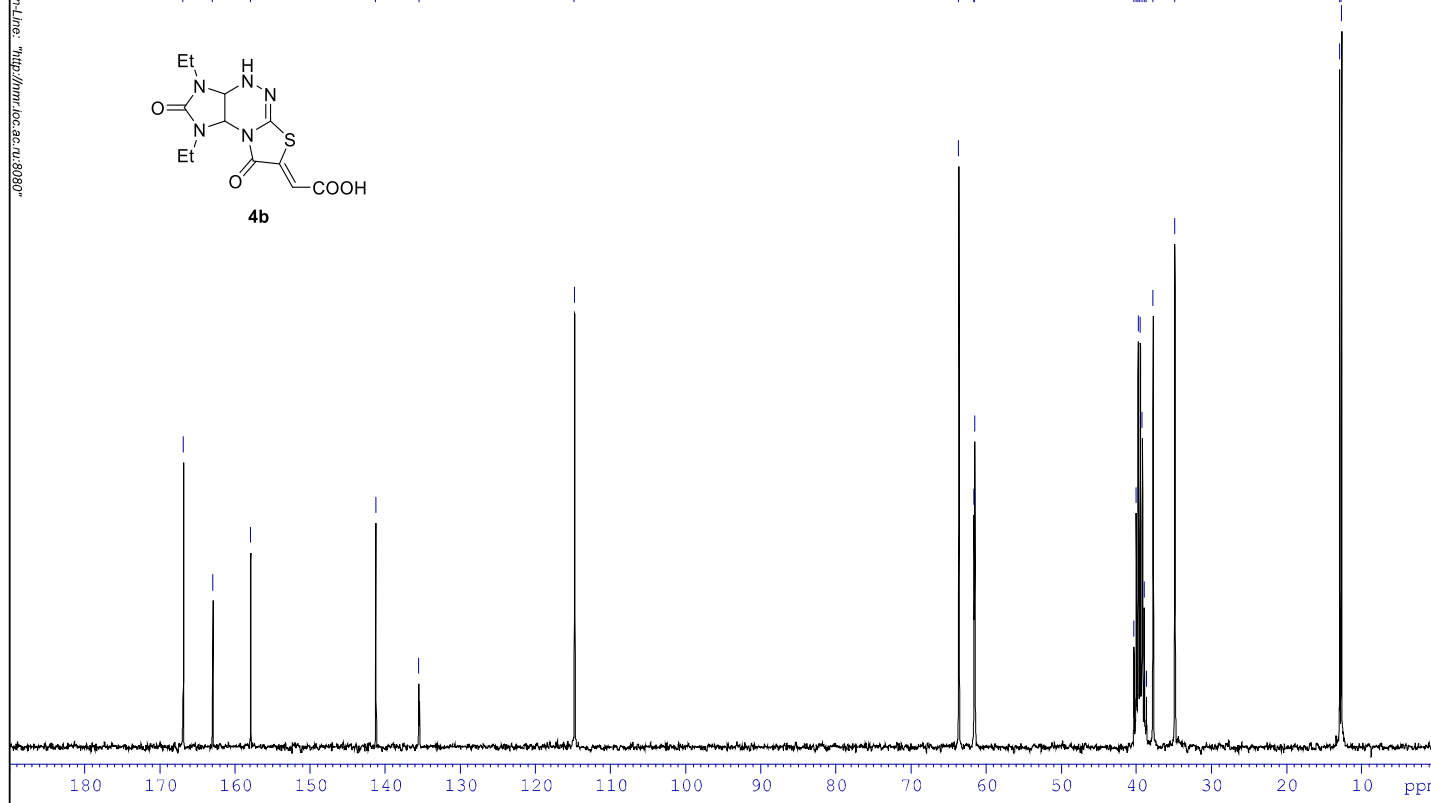

/KANI IA1190.1

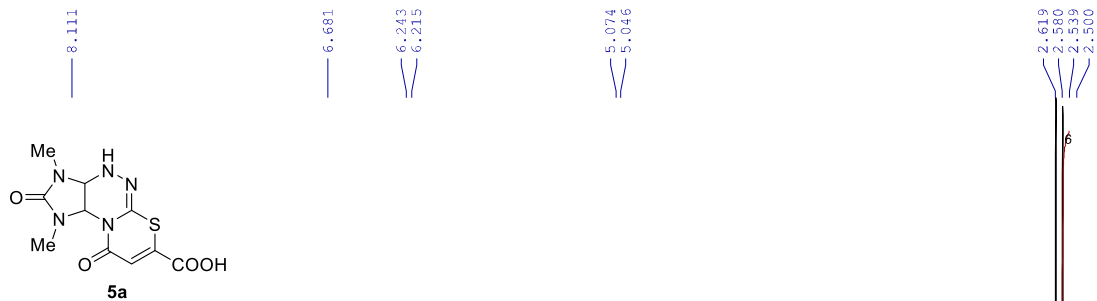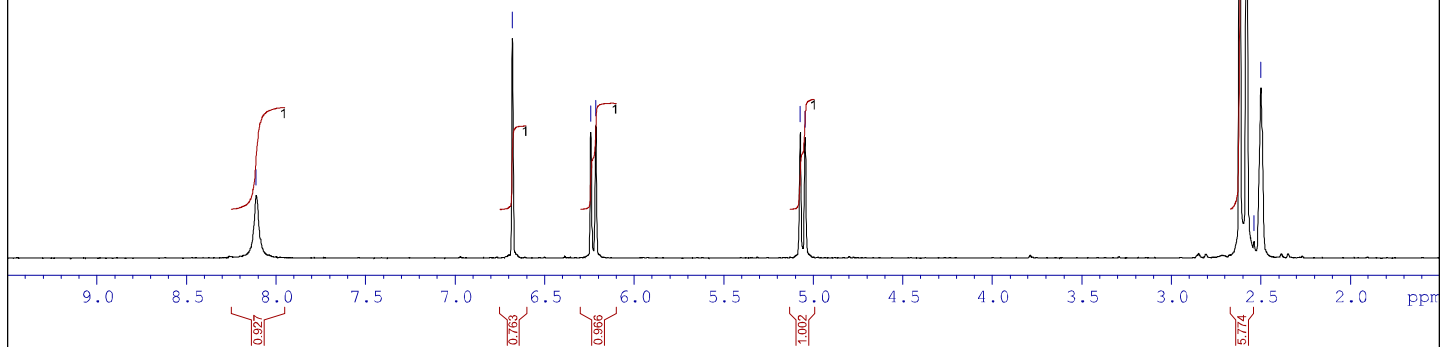

/KANI IA1190.1

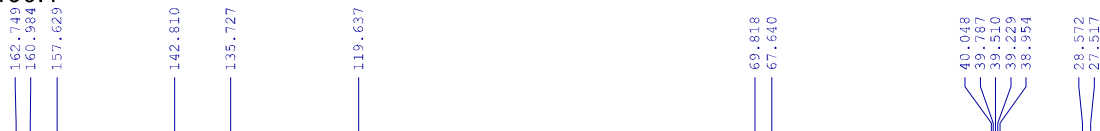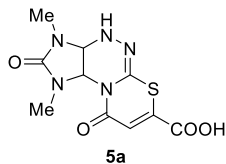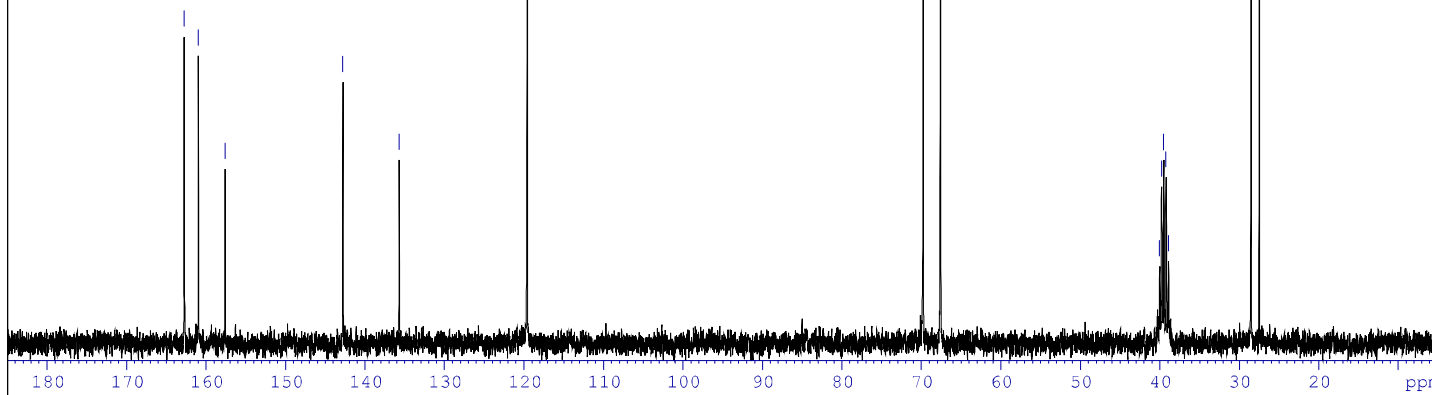

# /KANI IA1190 {1H-13C} HMBC

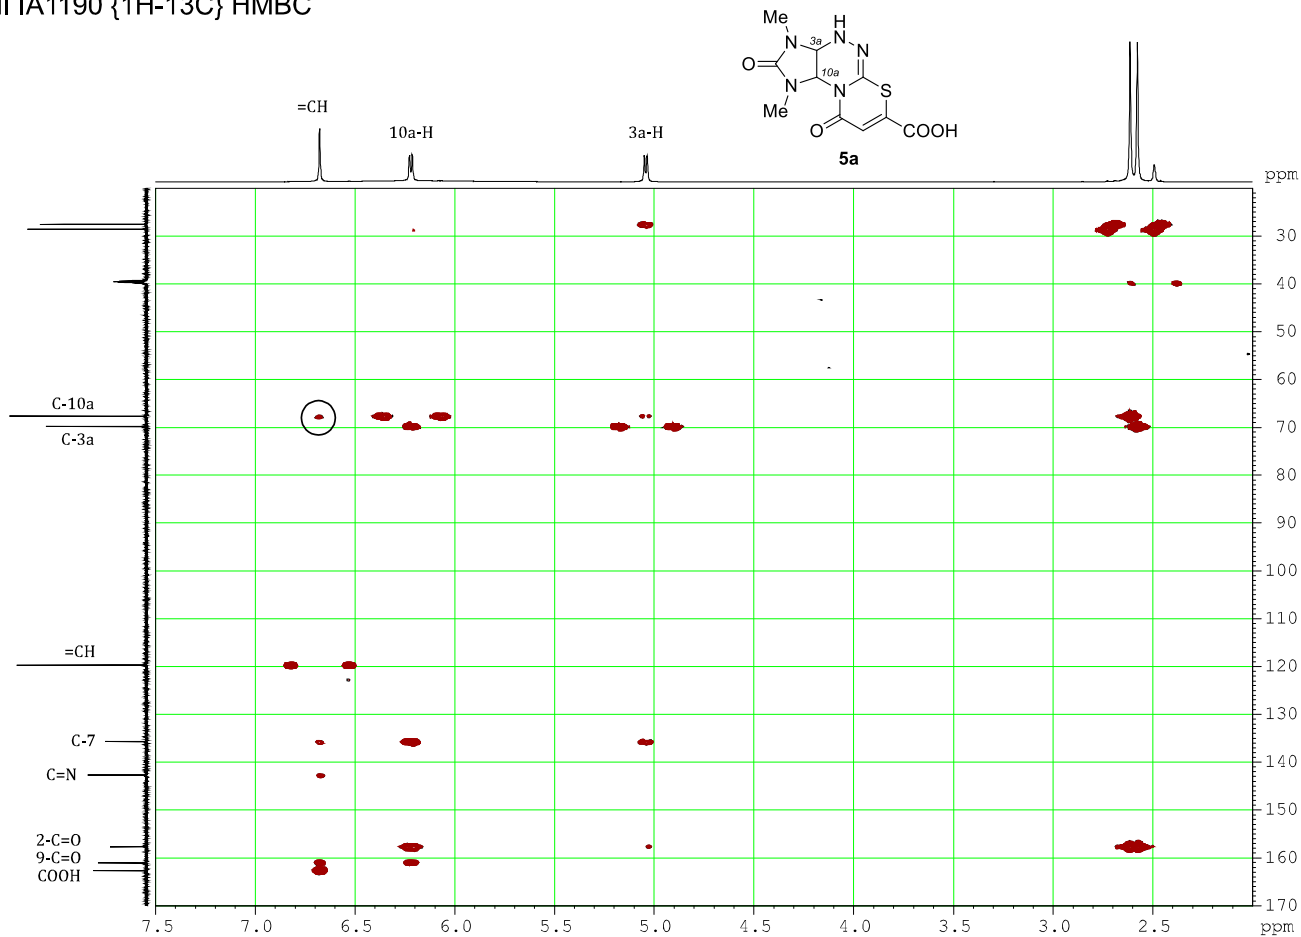

# /KANI VDB128.1

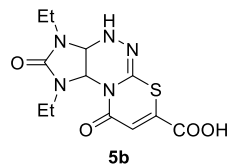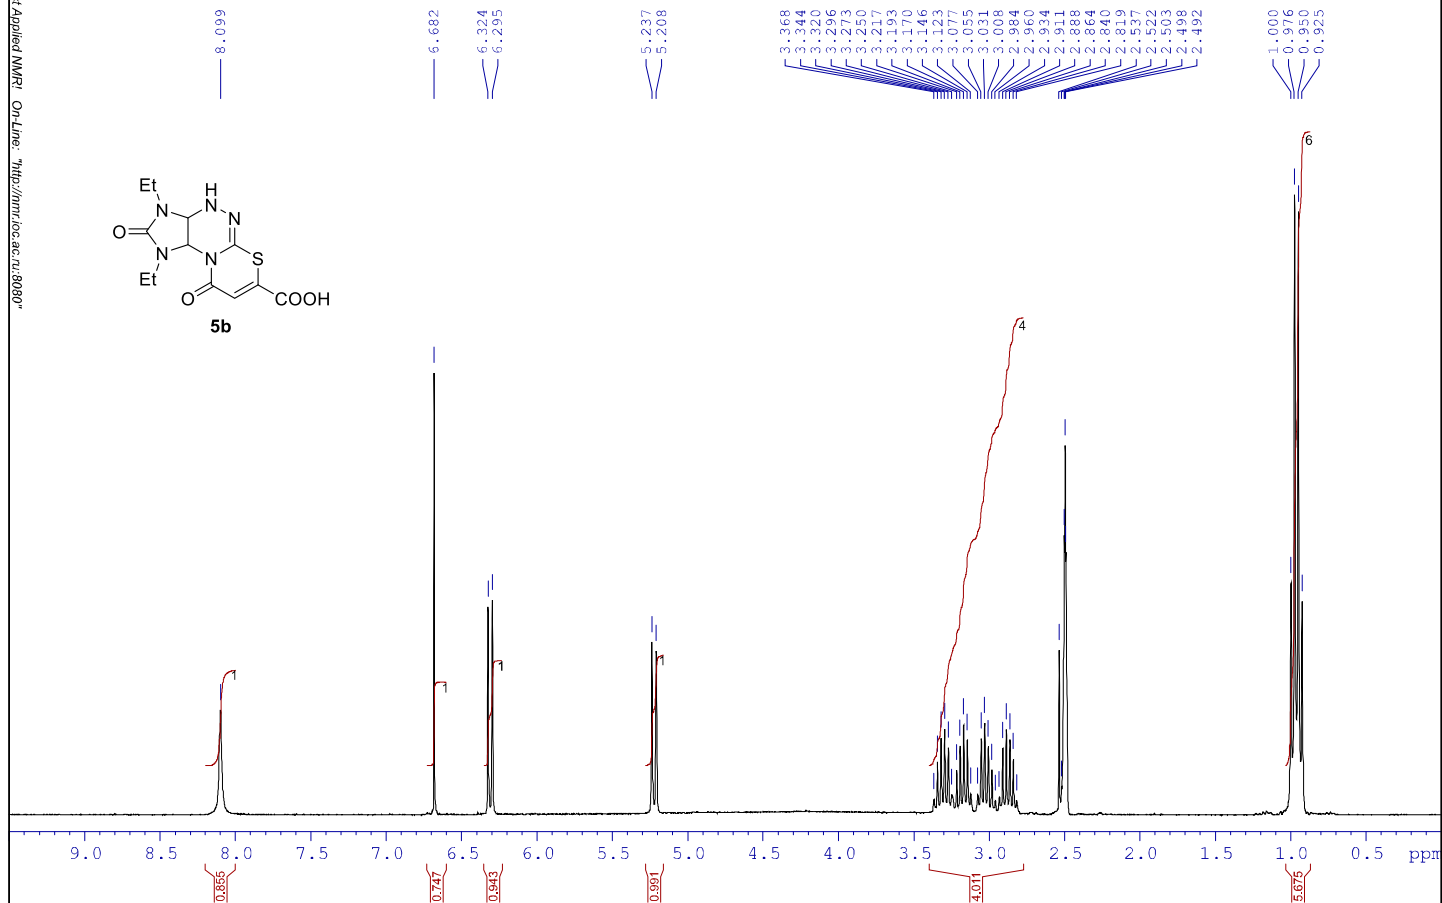



/KANI VDB128.1

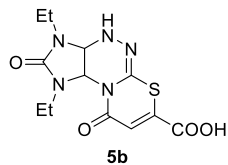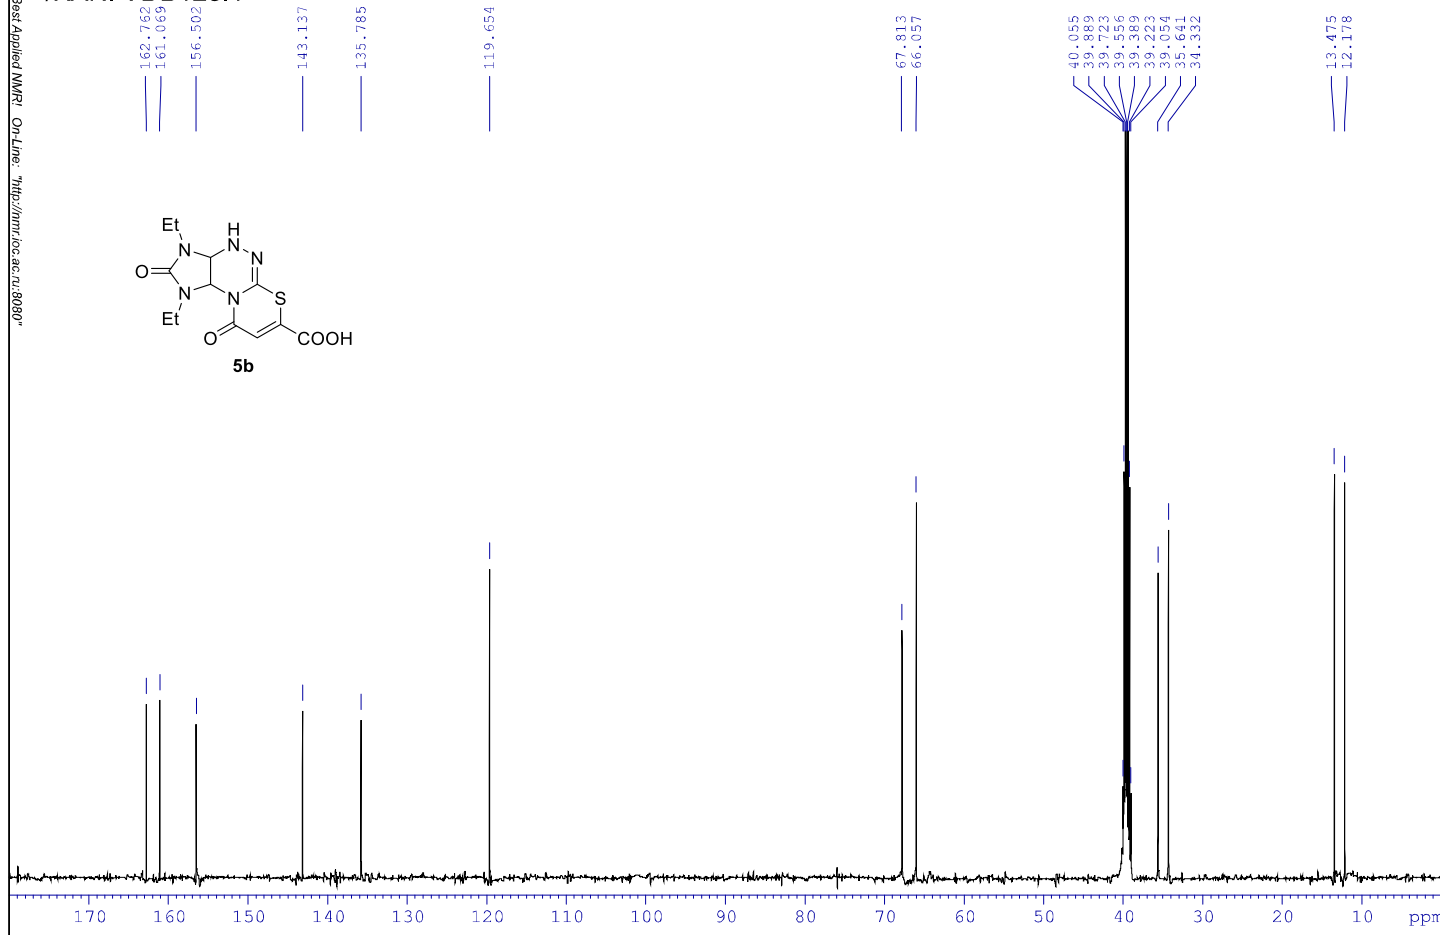

/KANI VDB404.1

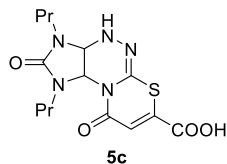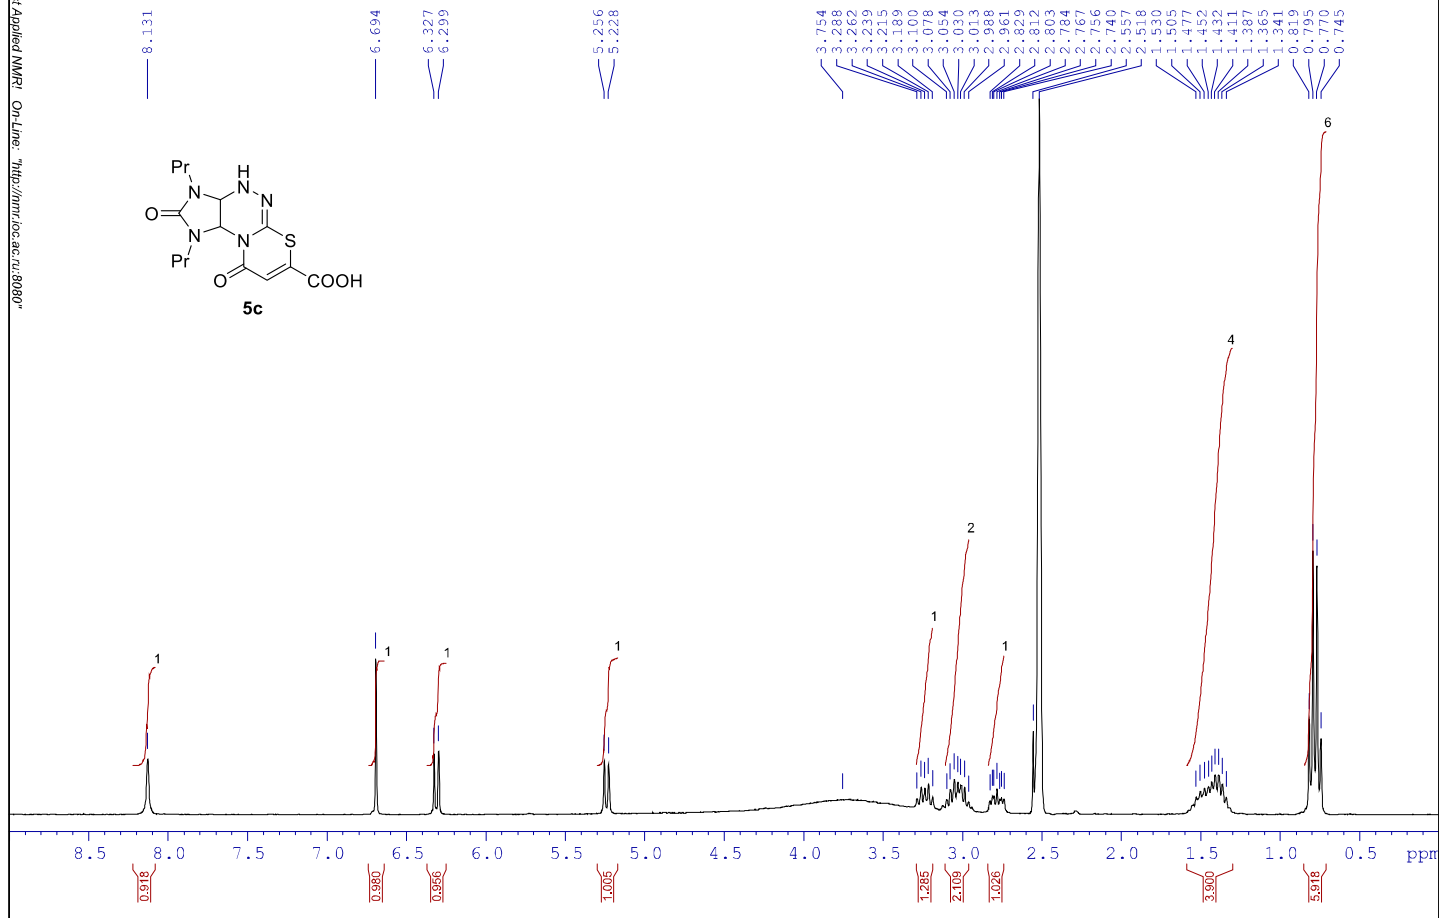

/KANI VDB389.1

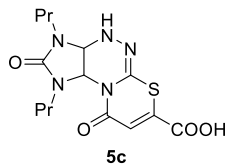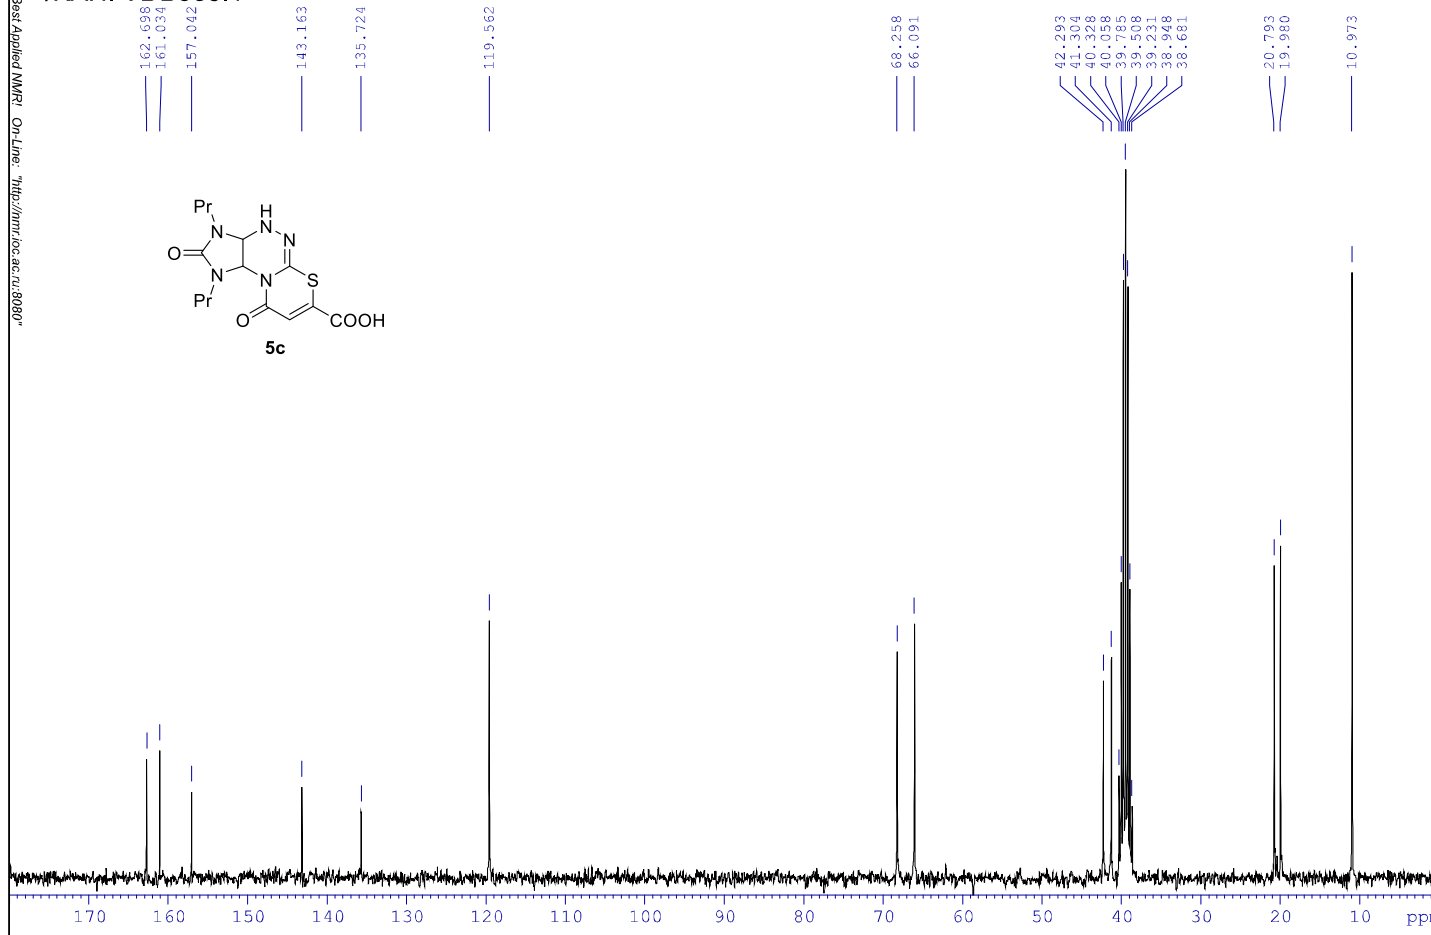

# /KANI VDB393.2

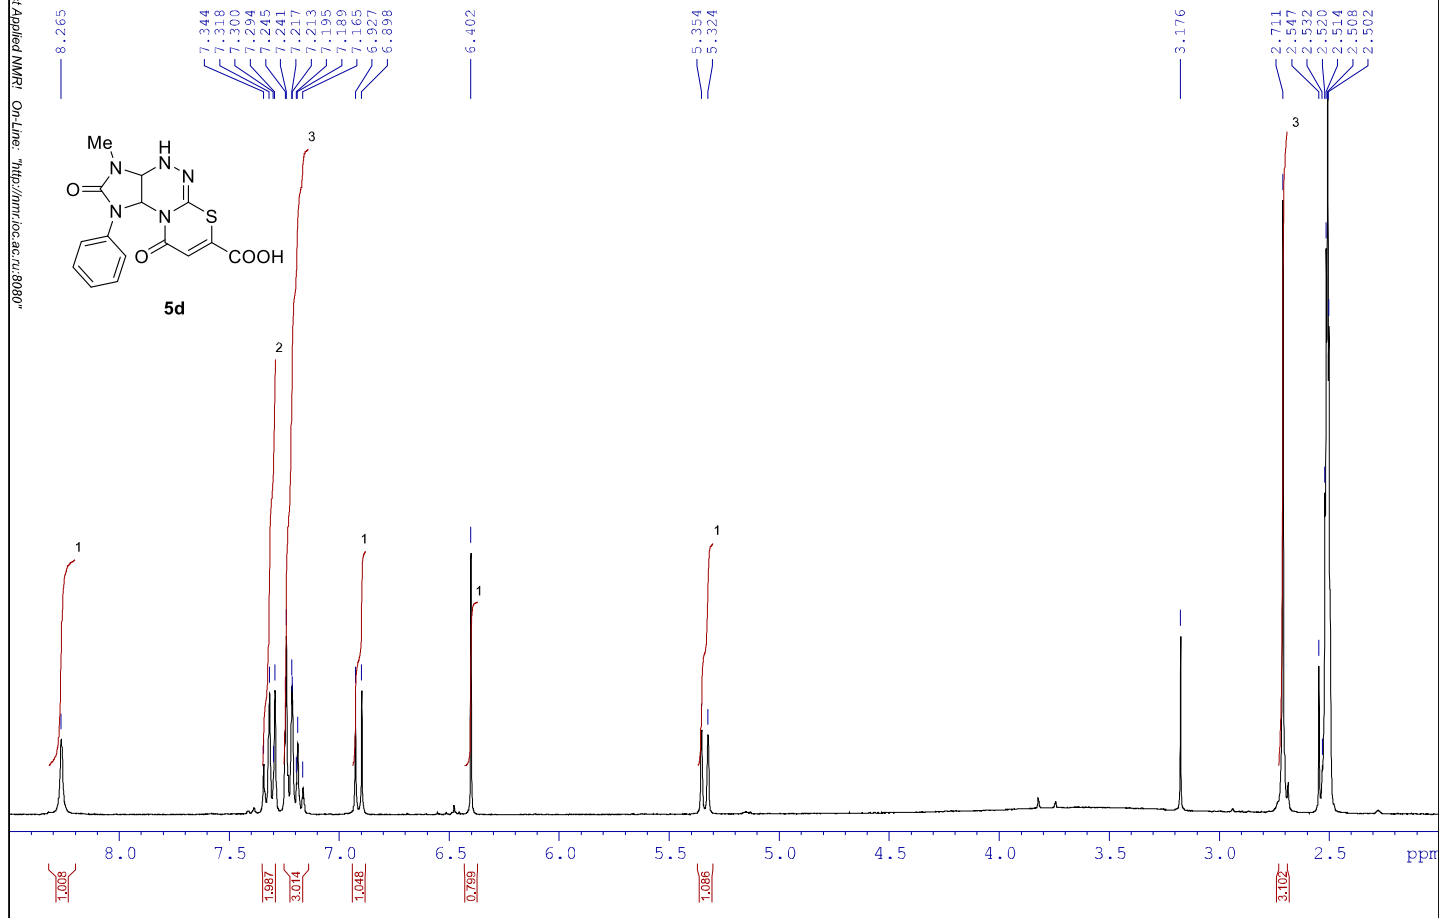

/KANI VDB261.7

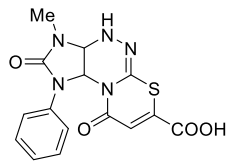

**5d**

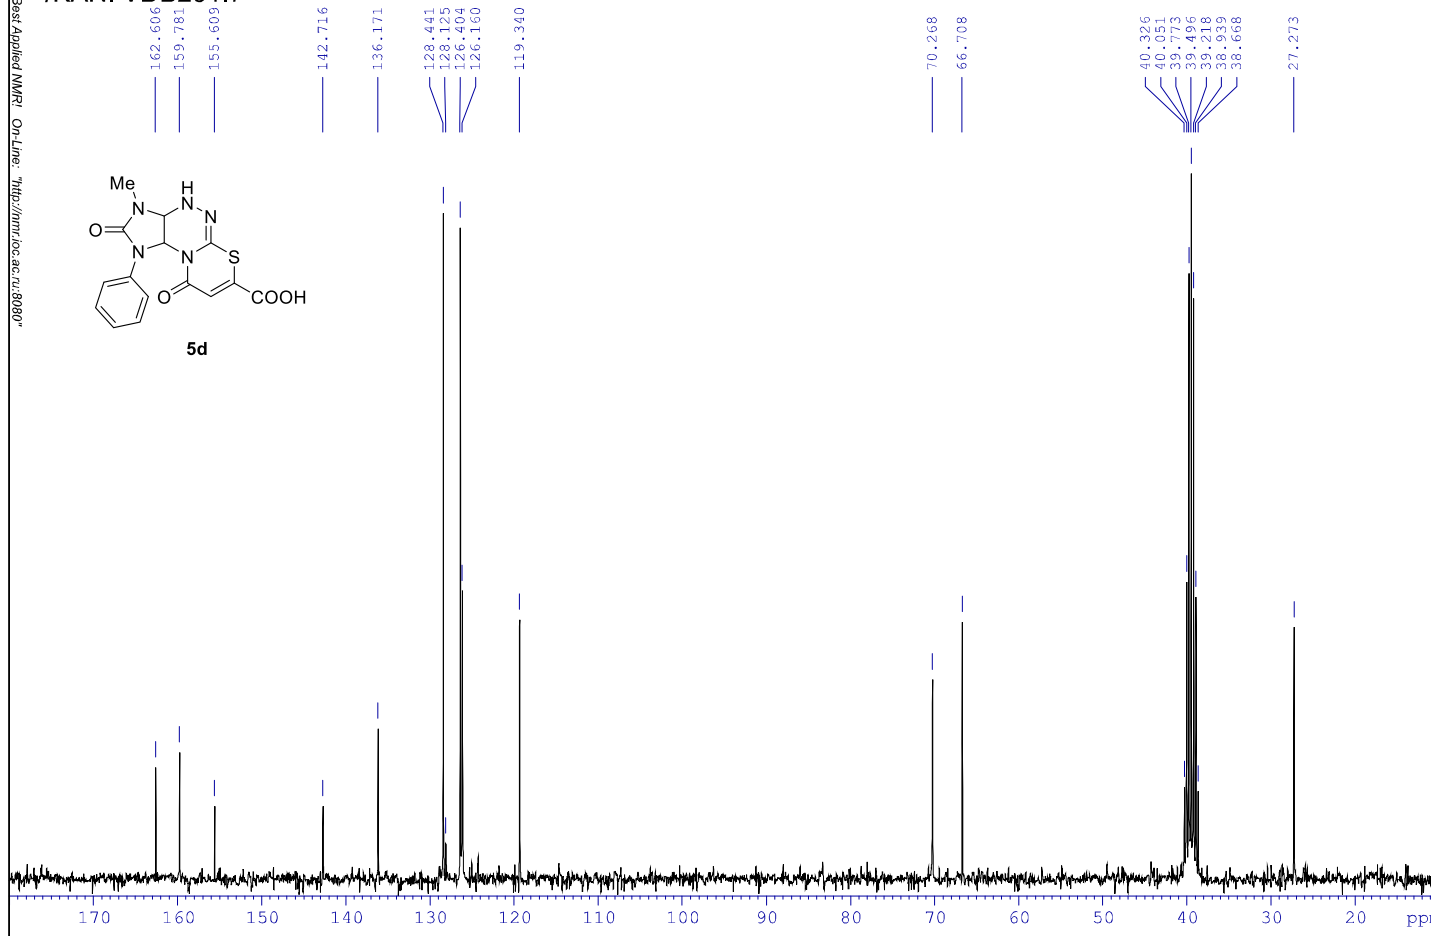

/KANI VDB403.1

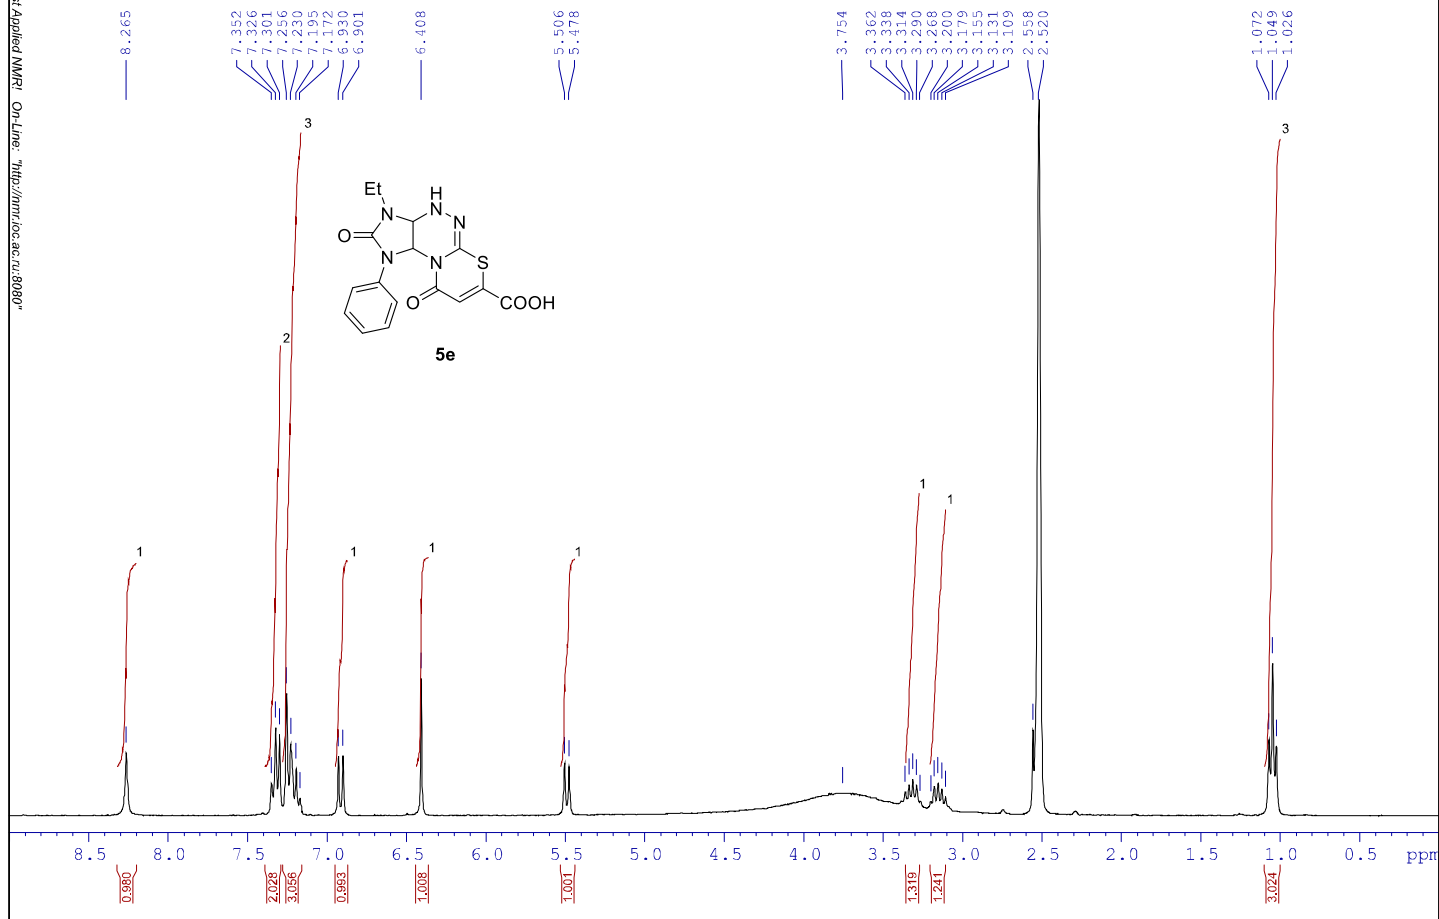

/KANI VDB403.1

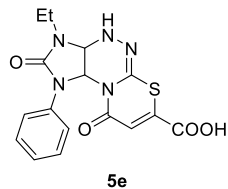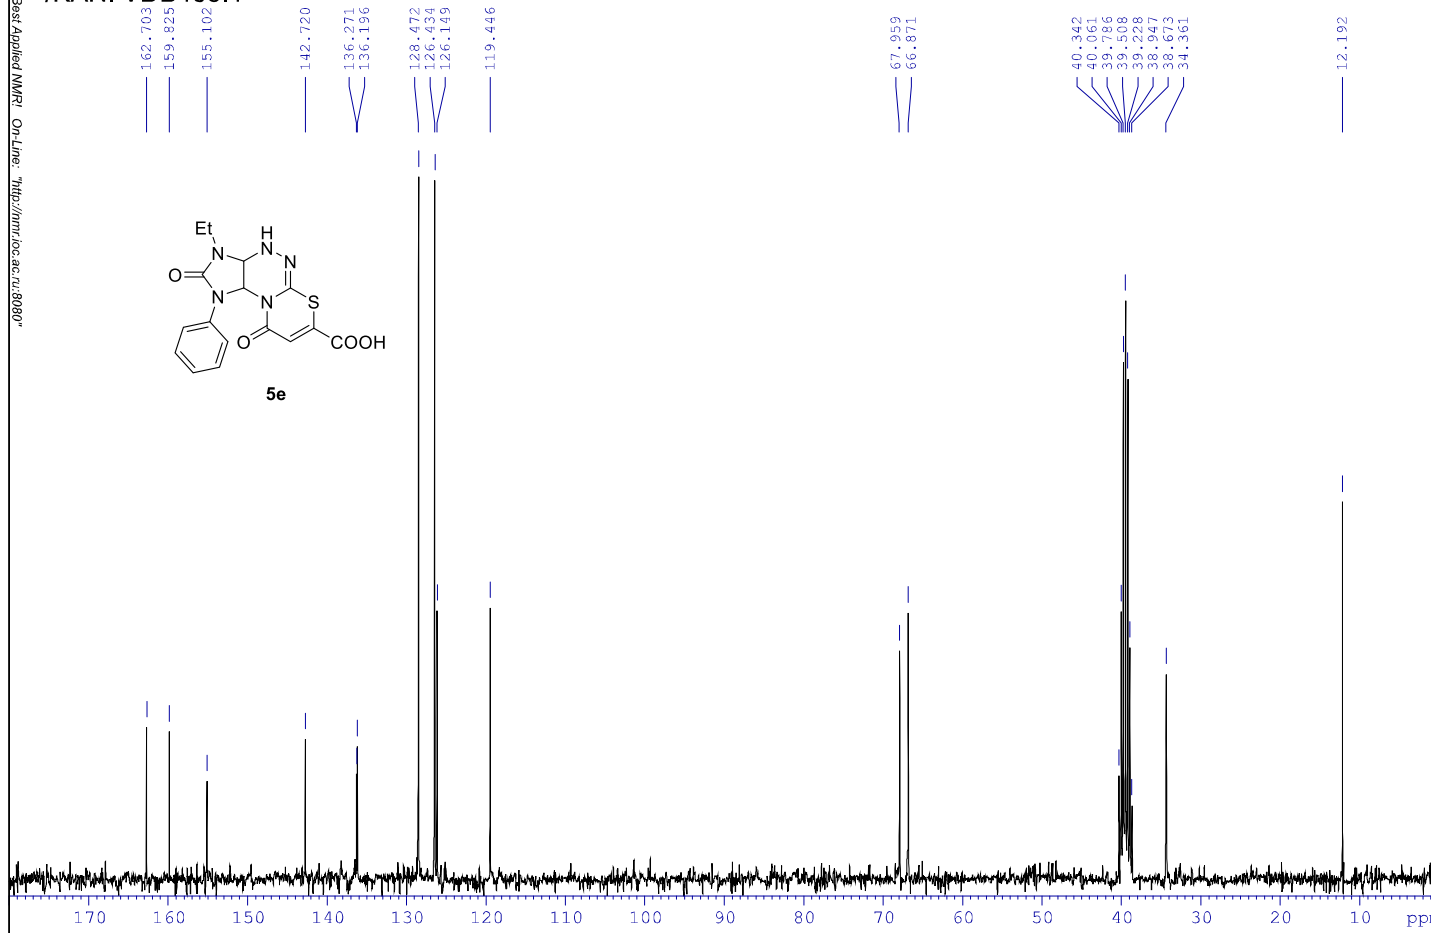

/KANI VDB589.1.1 Gazieva-20074

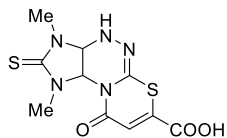

5f

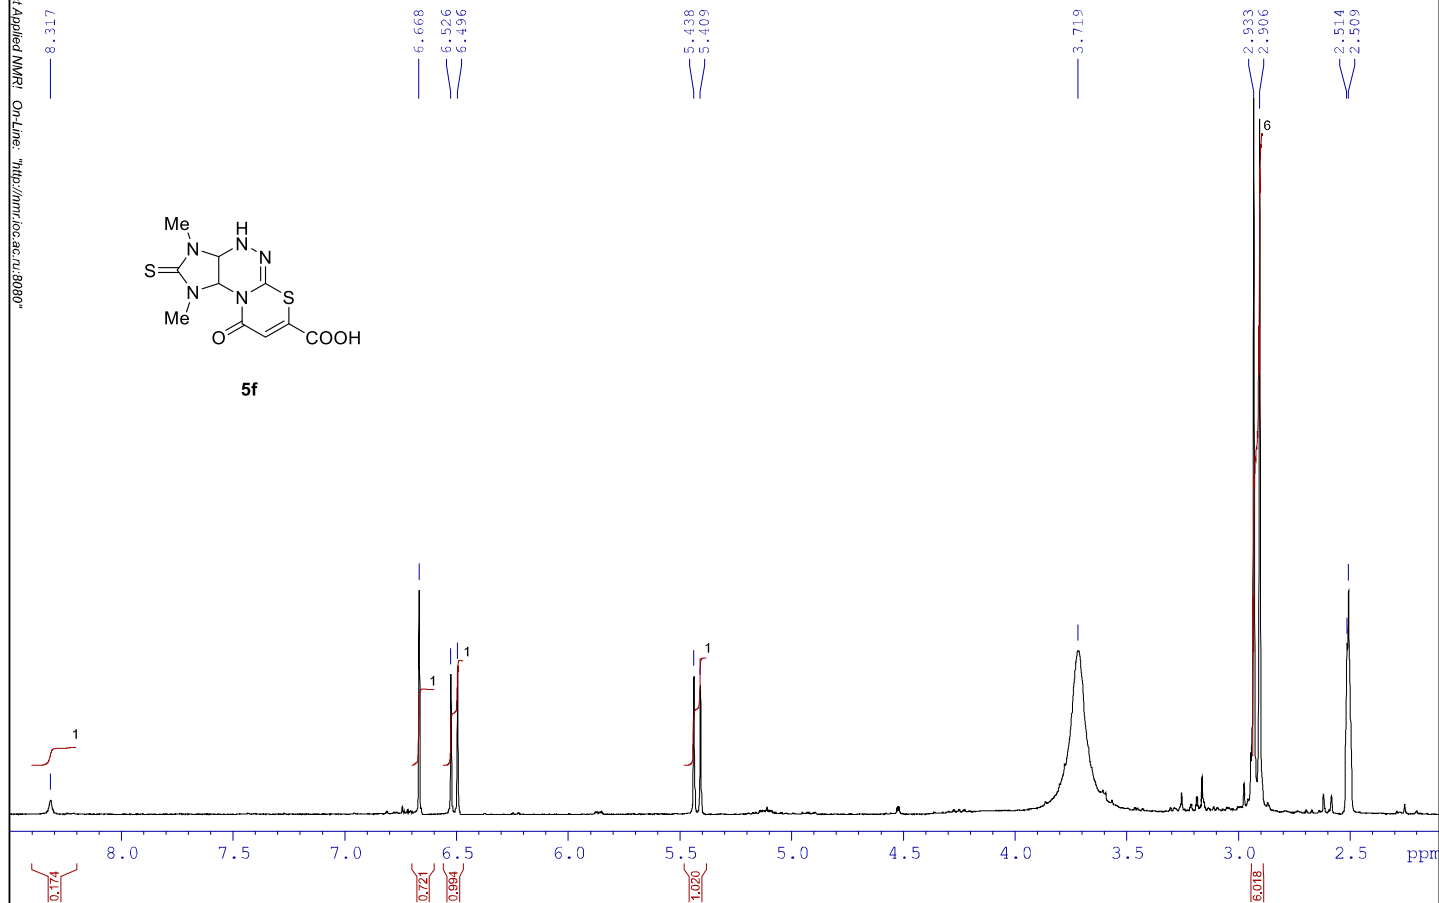



/KANI VDB589.1.1 Gazieva-20074

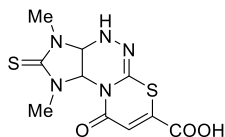

5f

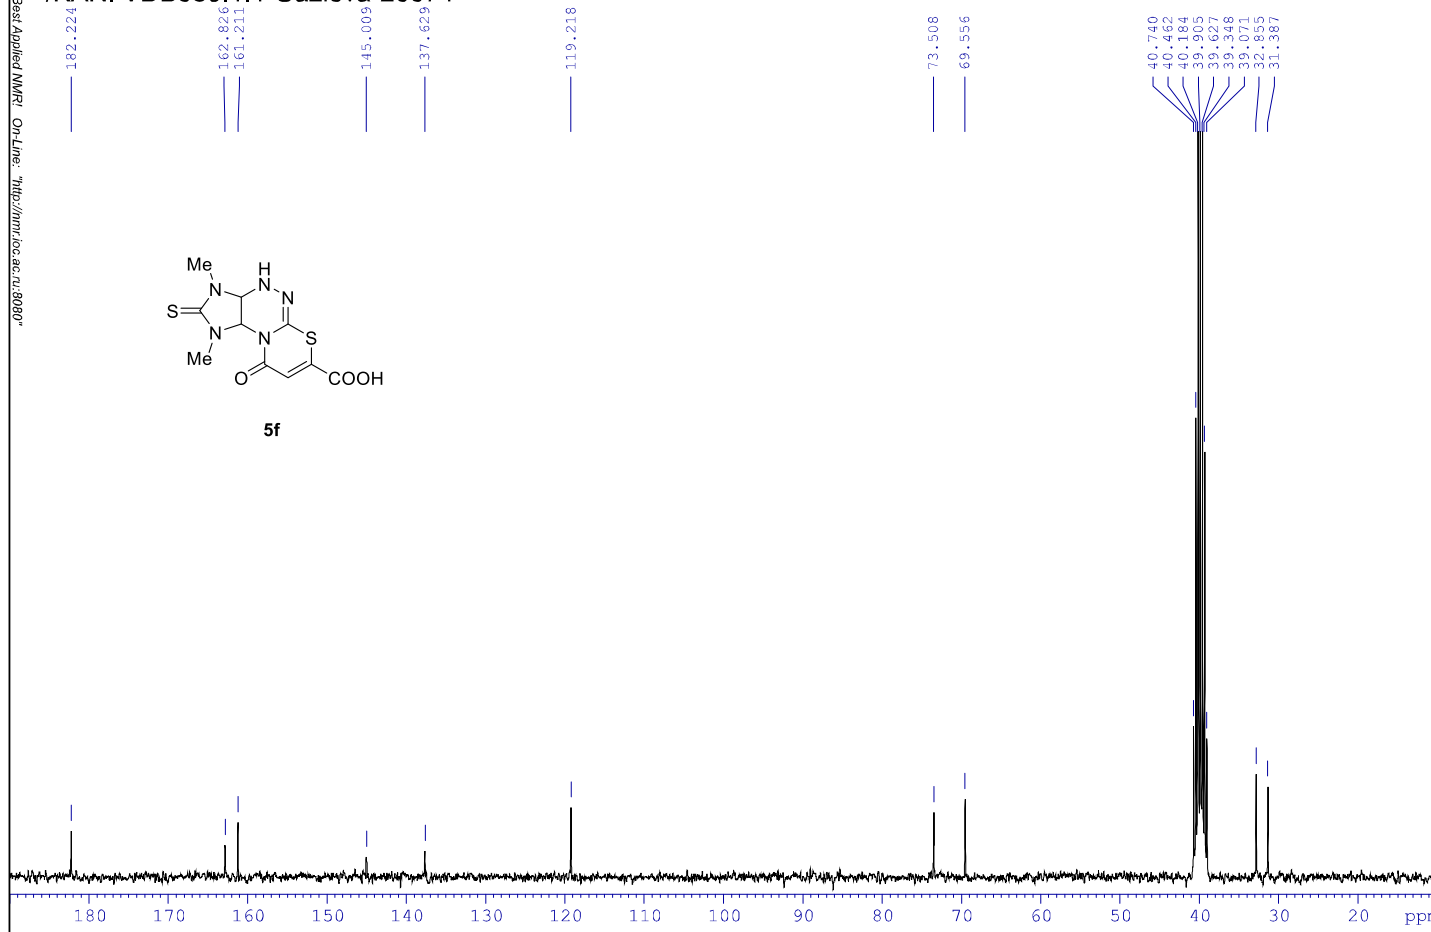

/KANI VDB402.1

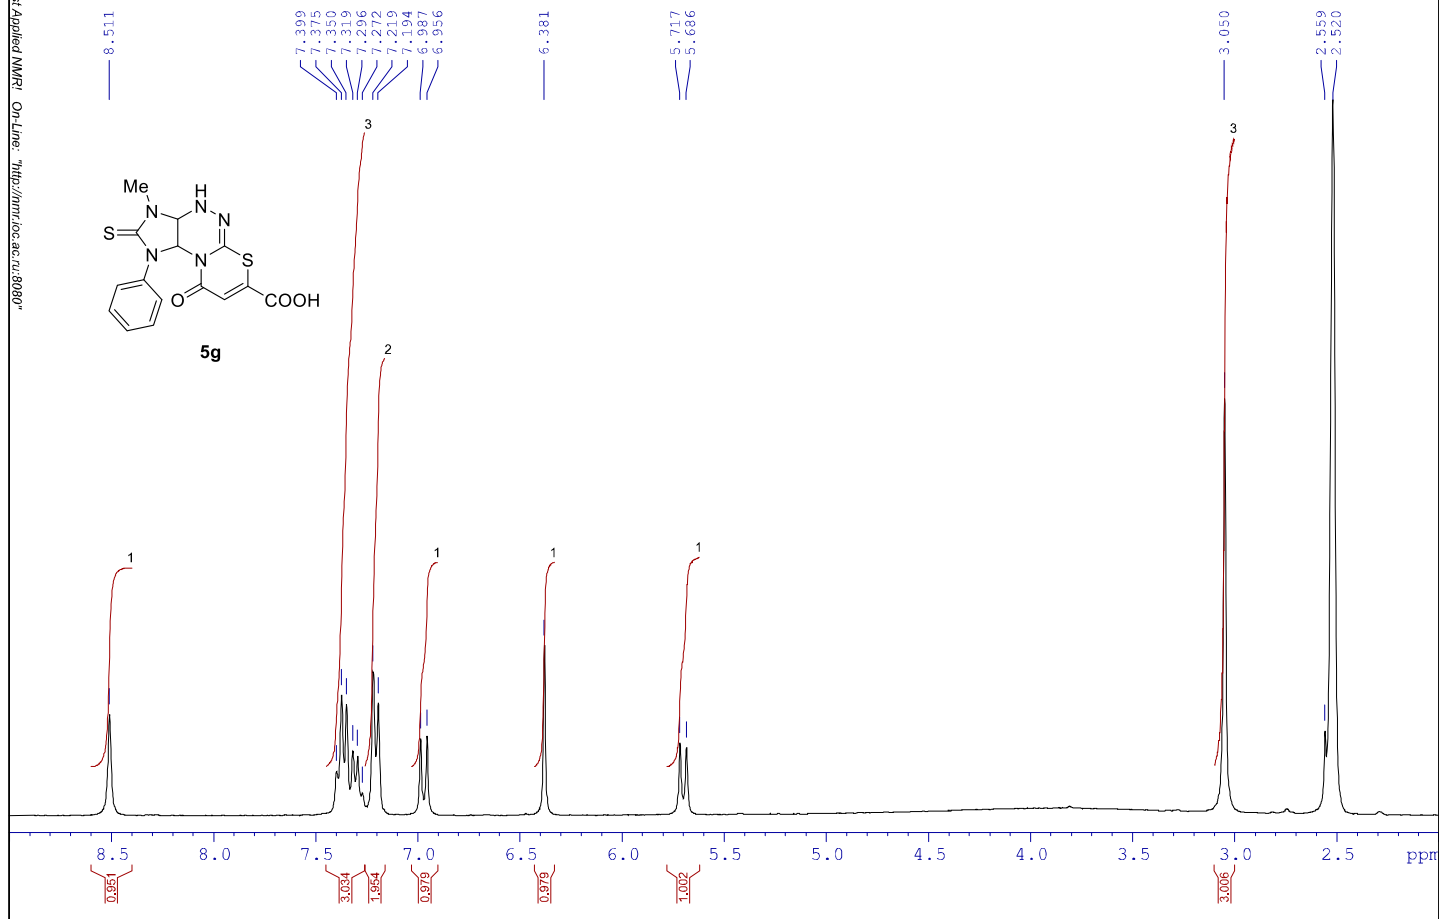

/KANI VDB402.1

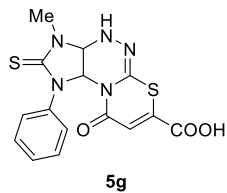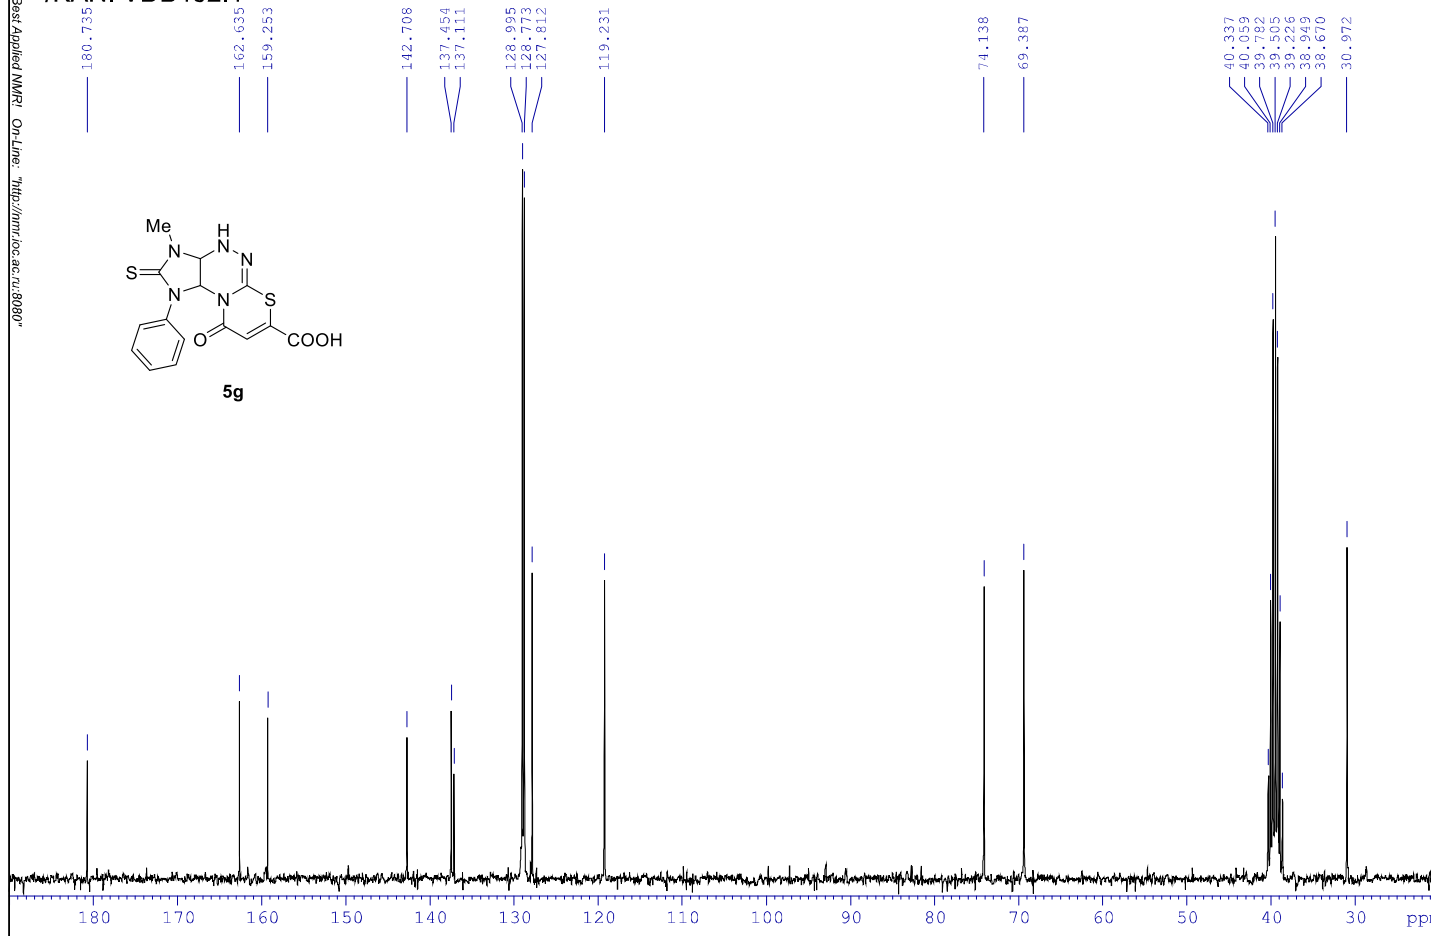

/KANI VDB409.1

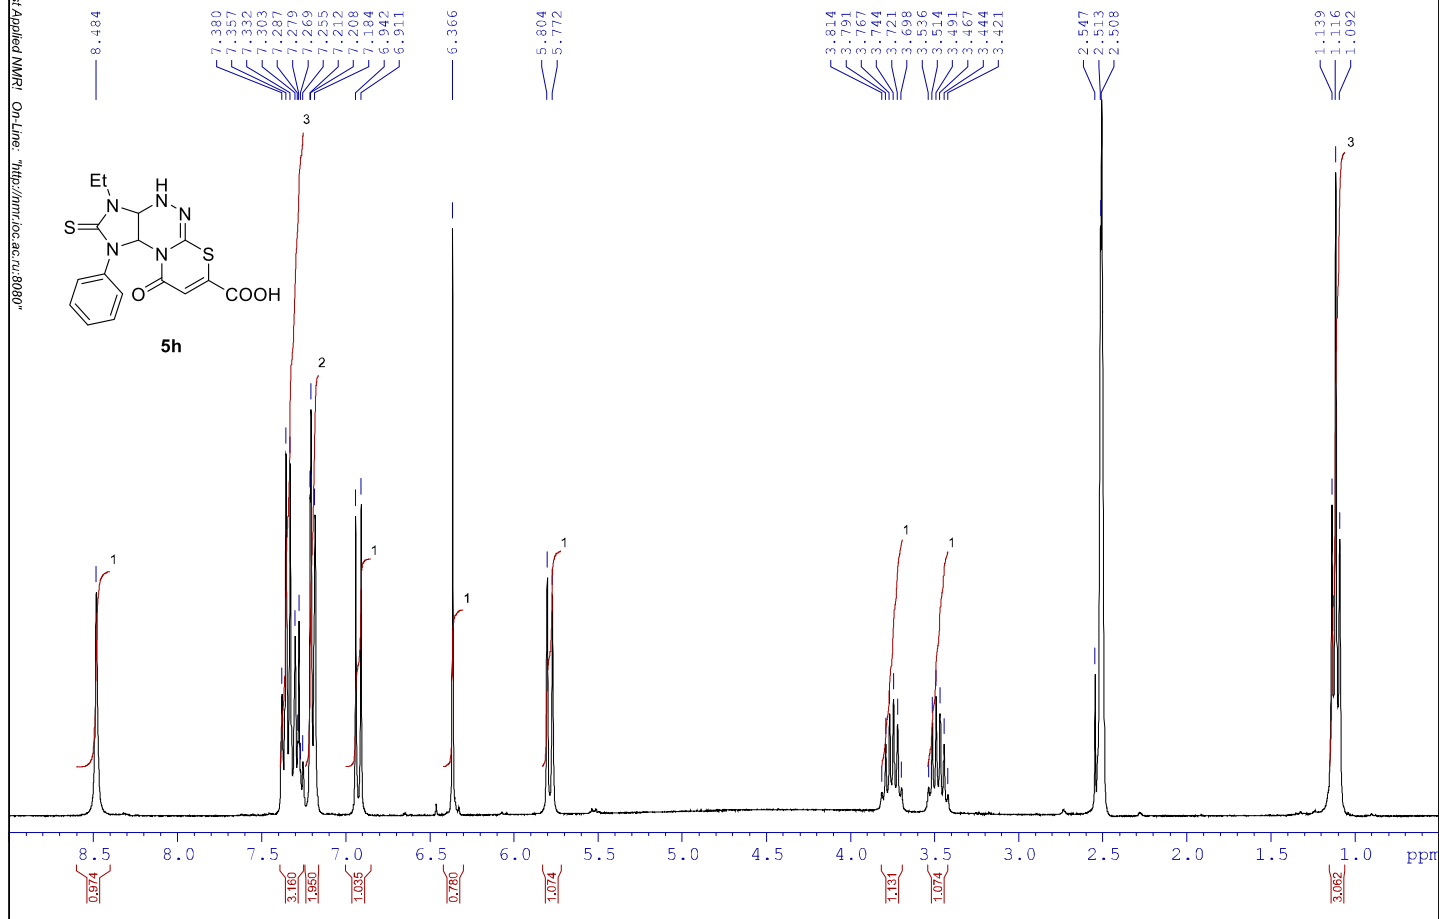

/KANI VDB384.1.1

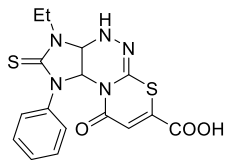

5h

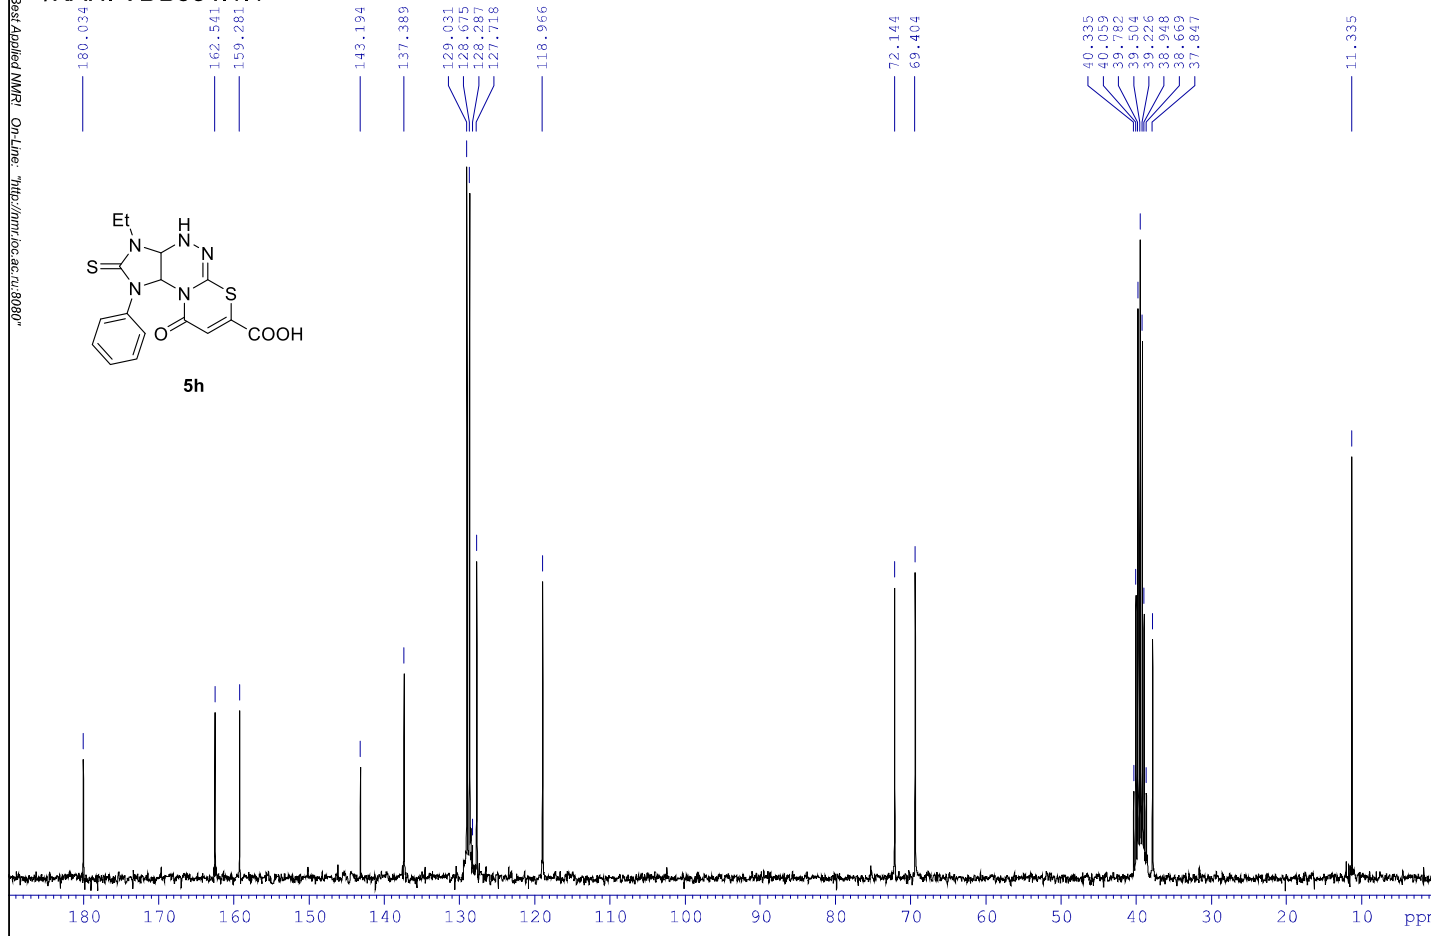

/KANI IA1845.1

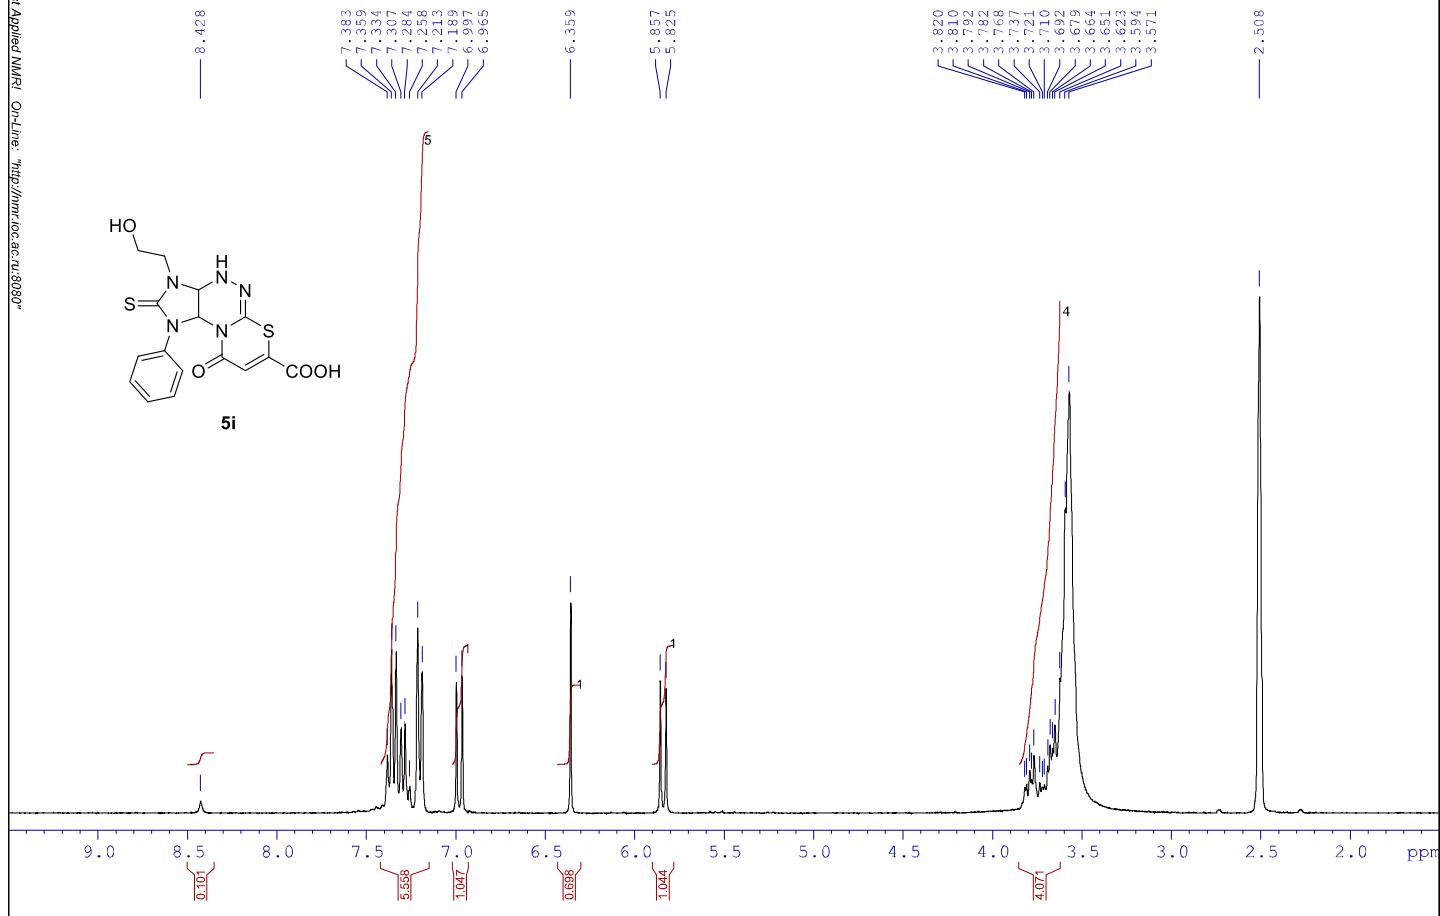

/KANI IA1845.1

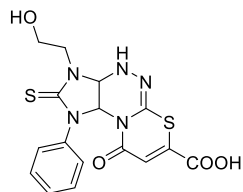

5i

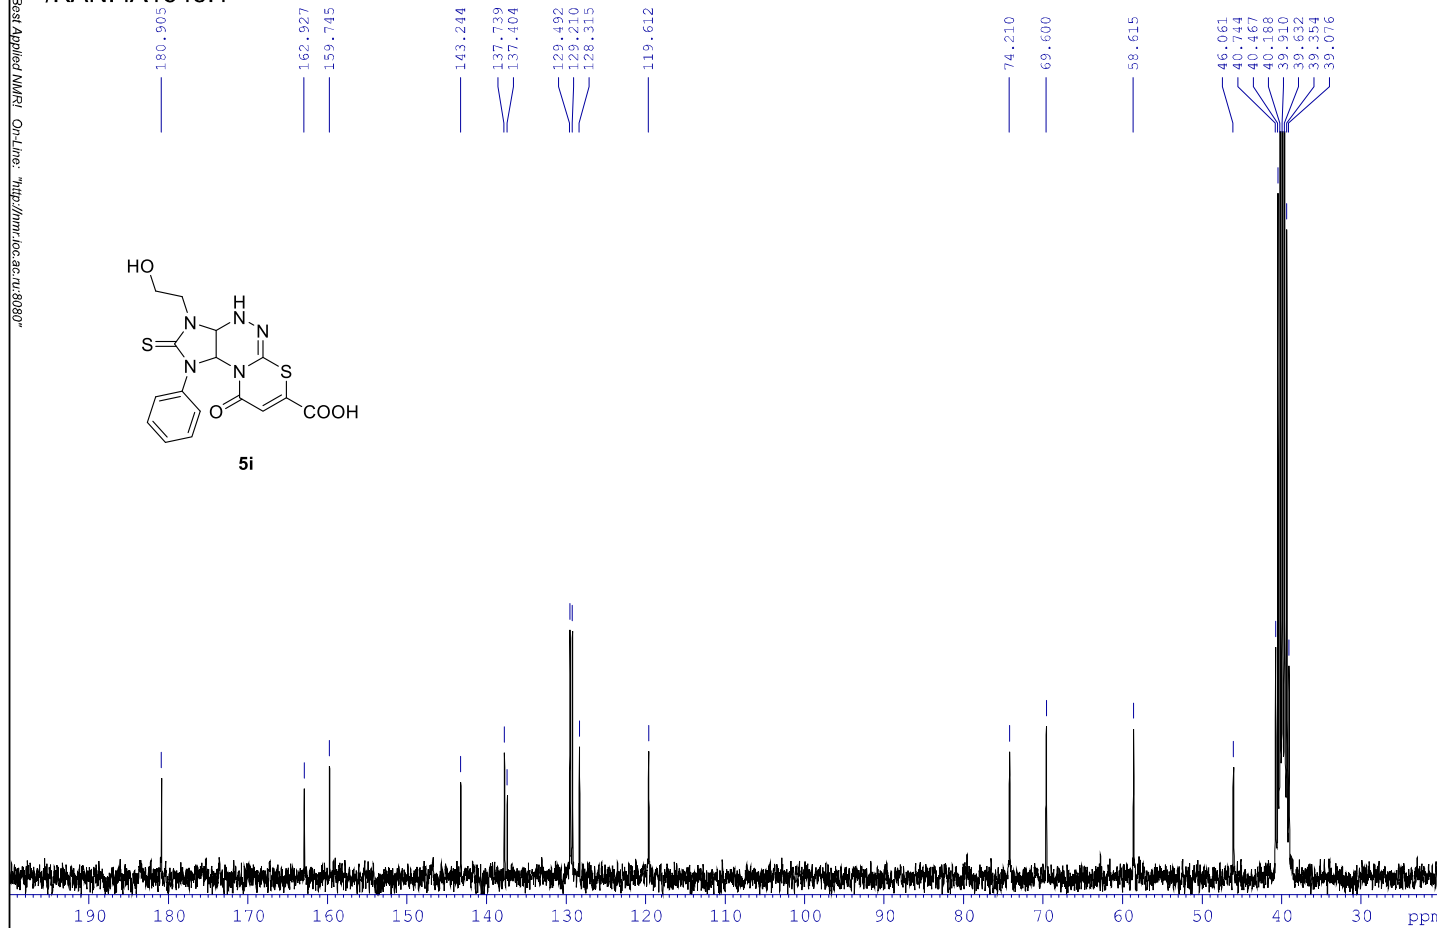

/KANI IA1846.1

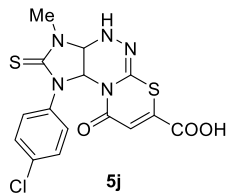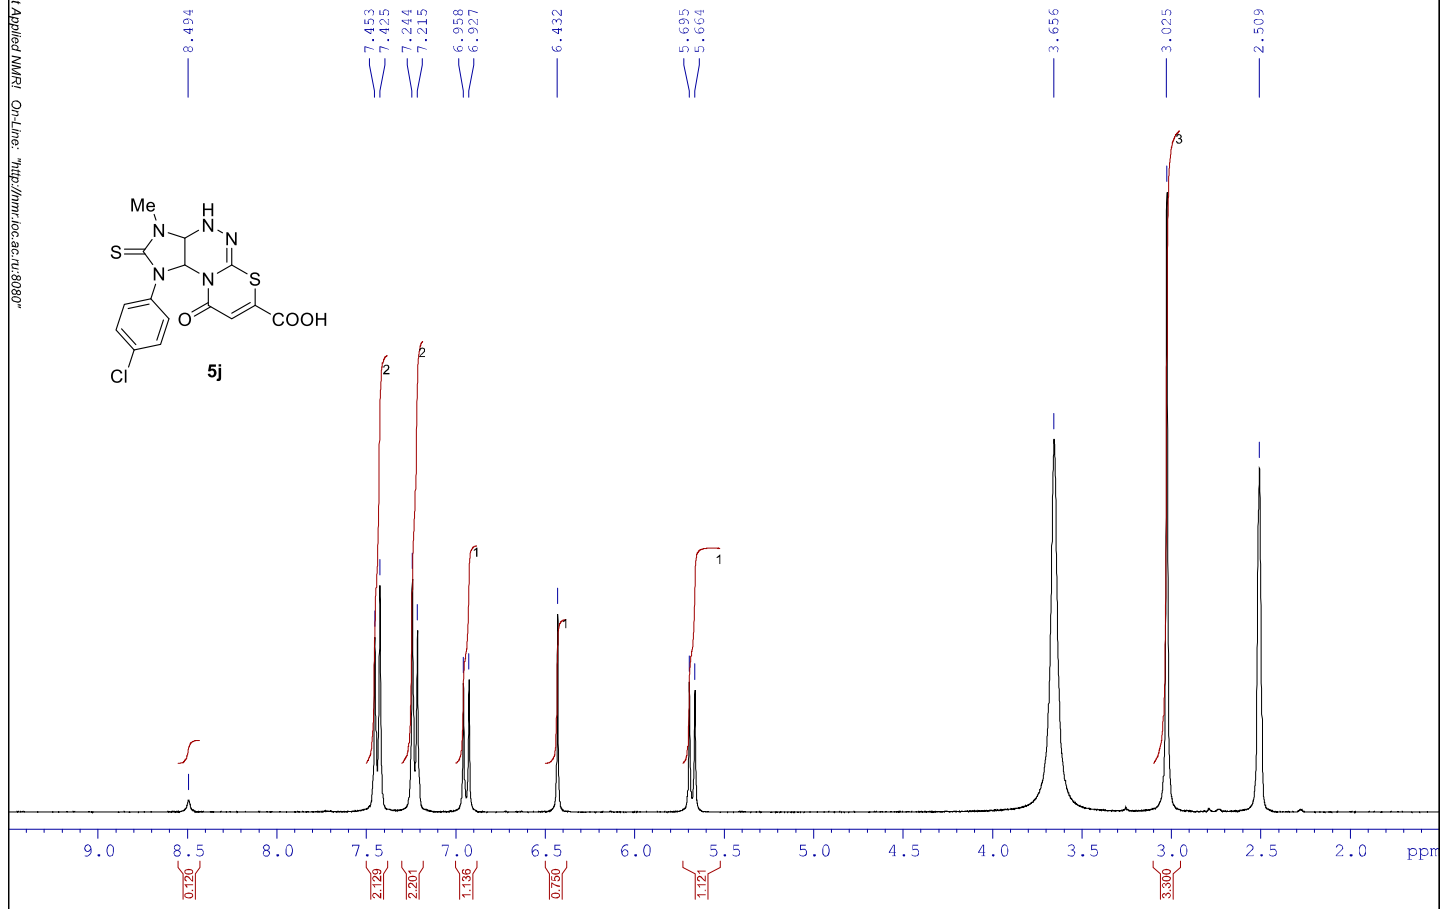



/KANI IA1846.1

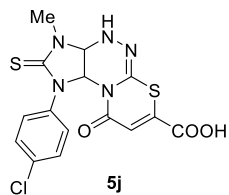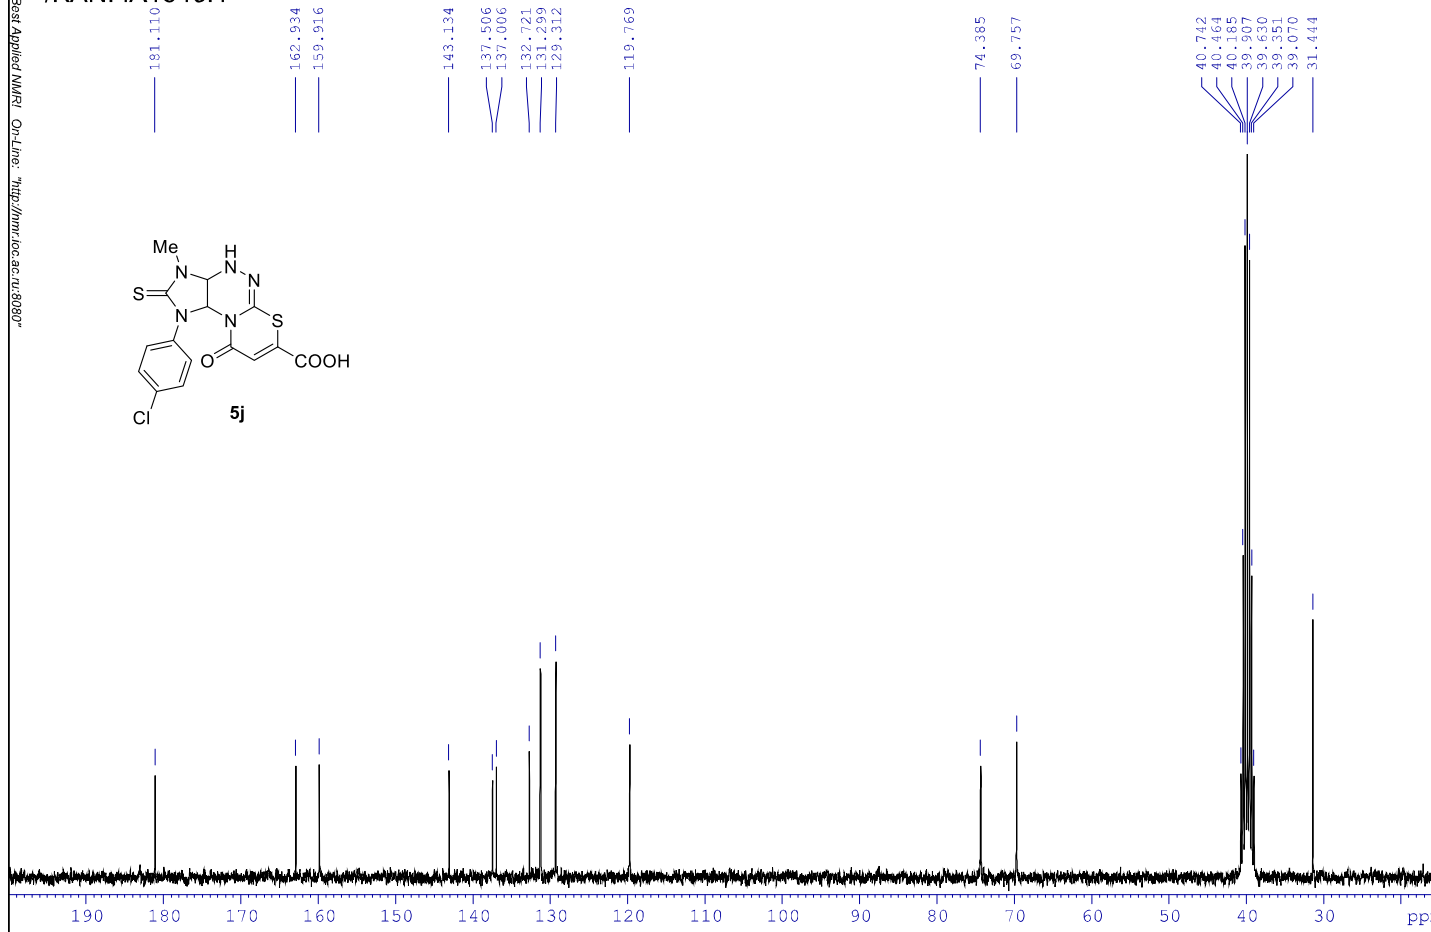

/KANI VDB602.11 Gazieva-20074

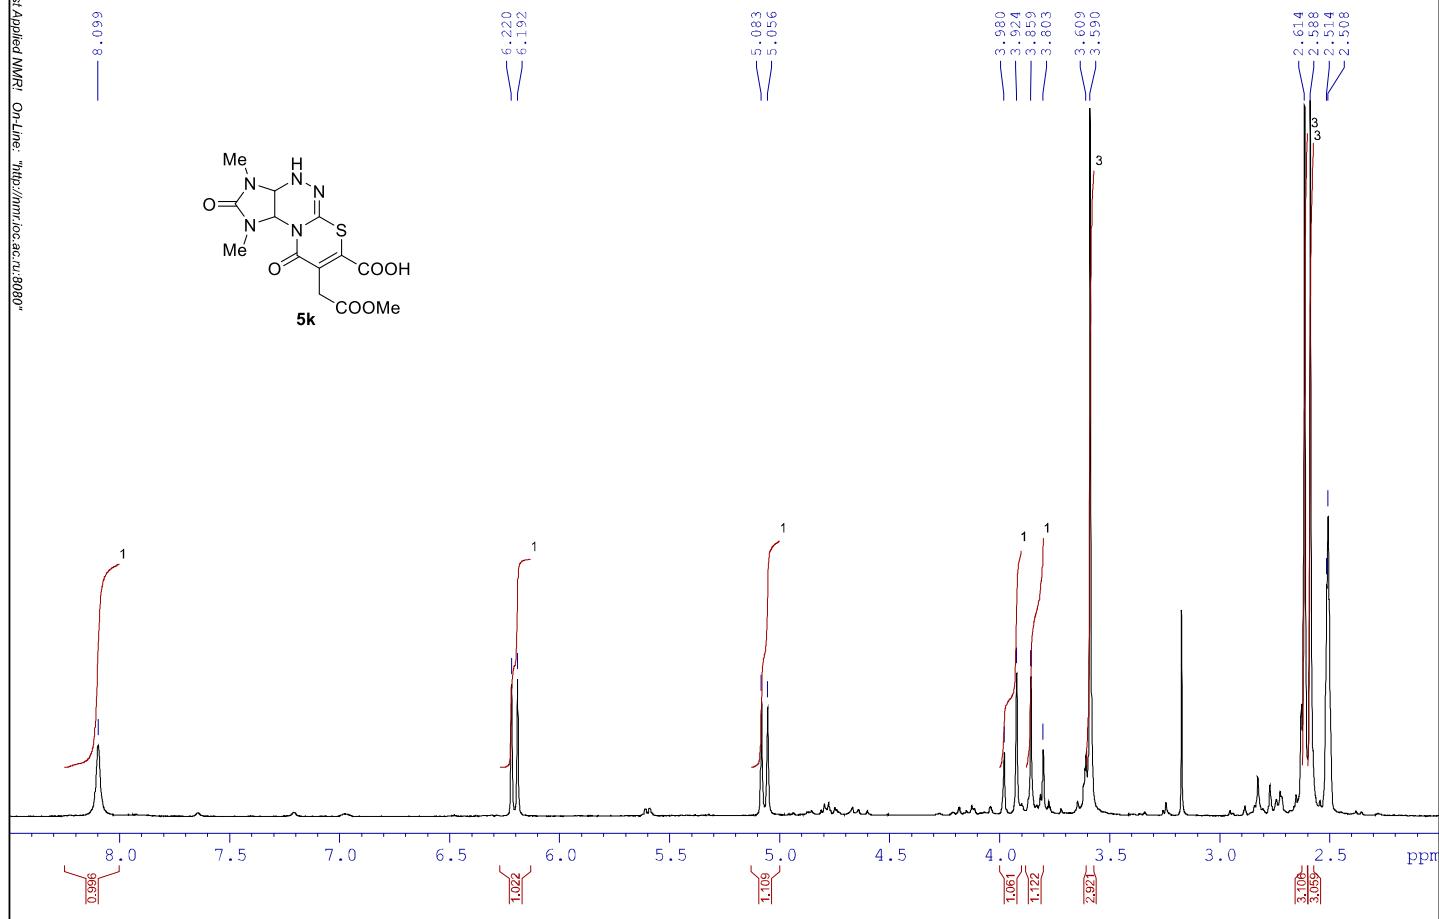

/KANI VDB602.1 Gazieva-20074

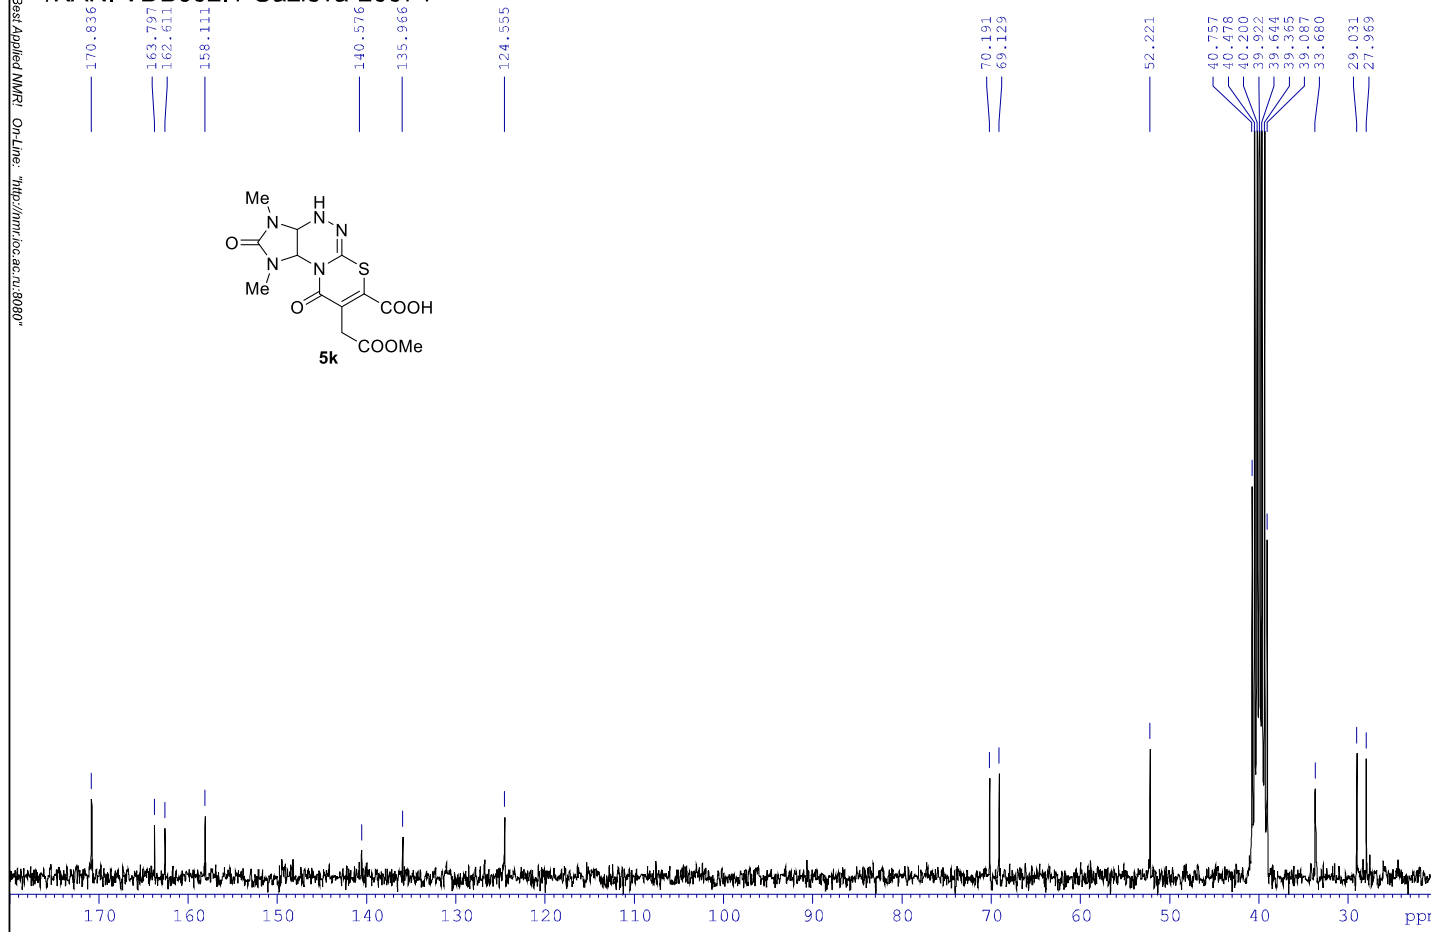

/KANI VDB602.1 Gazieva-20074  
HSQC

The Best Applied NMR On-Line: <http://mr.roc.ac.ru/8080>

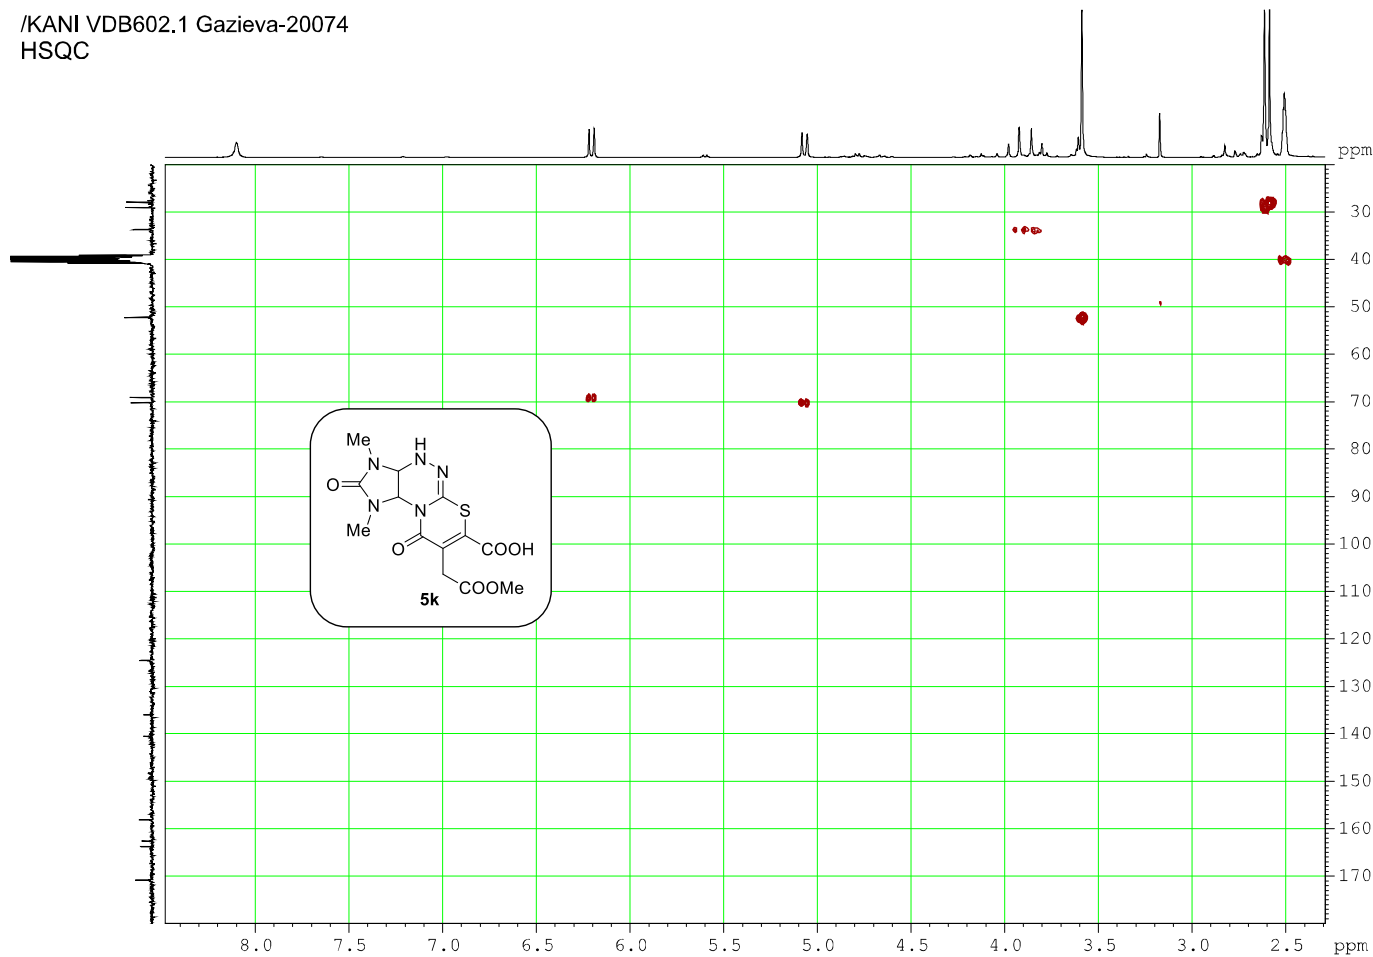

/KANI VDB602.1 Gazieva-20074  
HMBC

The Best Applied NMR On-Line: <http://mr.roc.ac.ru/8080>

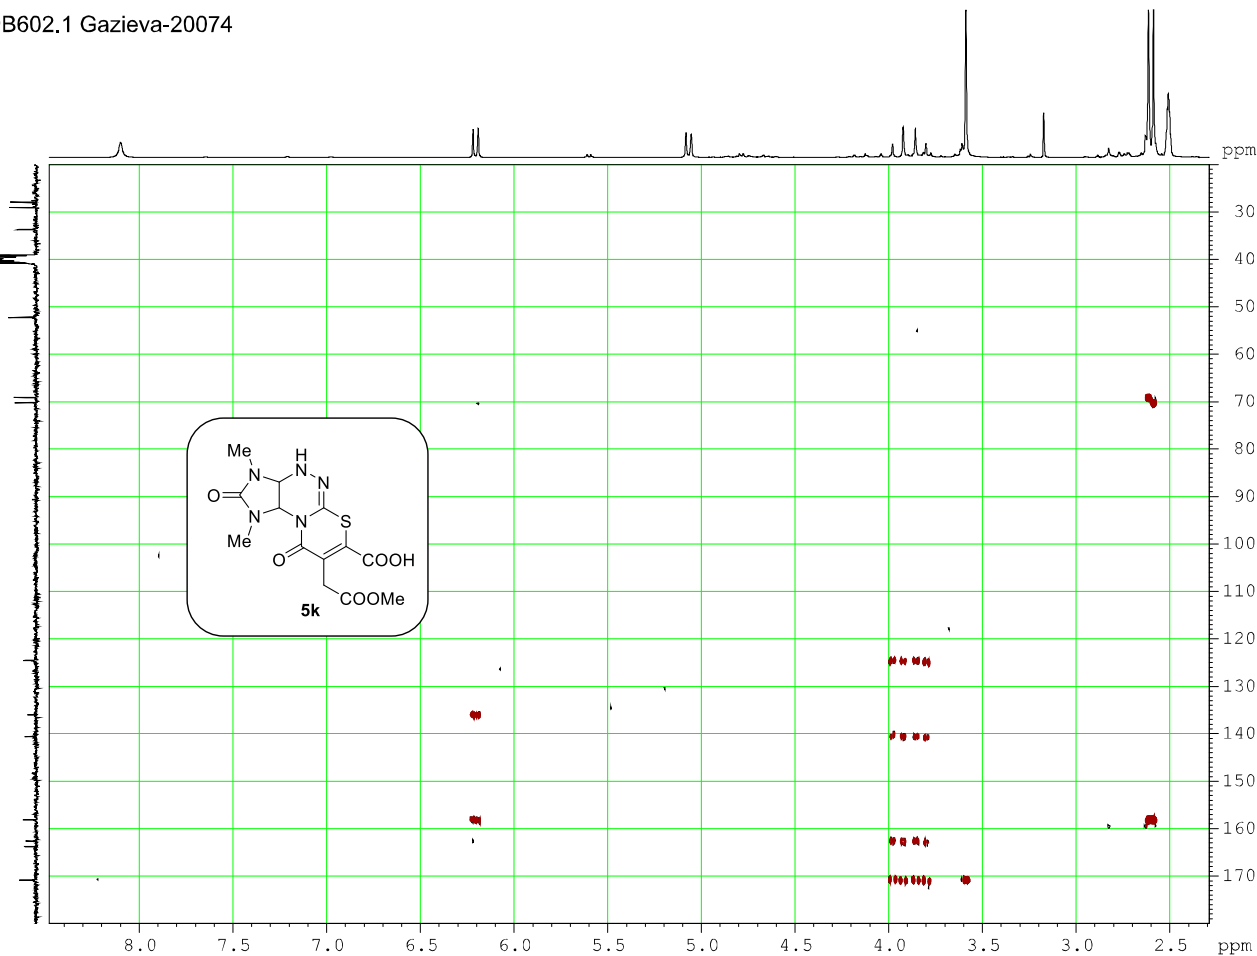

/KANI VDB596.3 Gazieva-20074

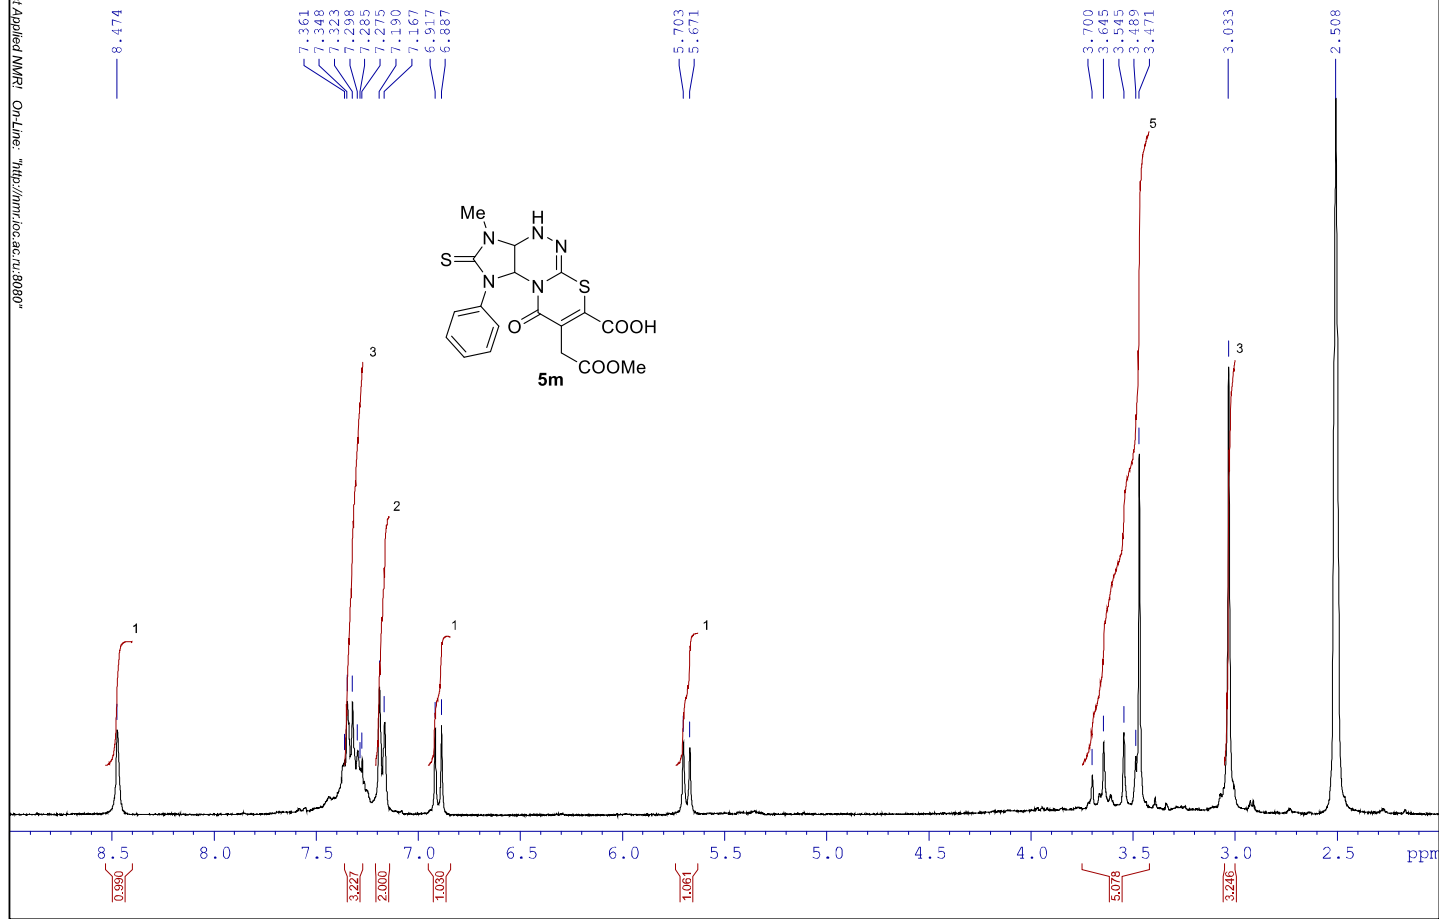

/KANI VDB601.1 Gazieva-20074

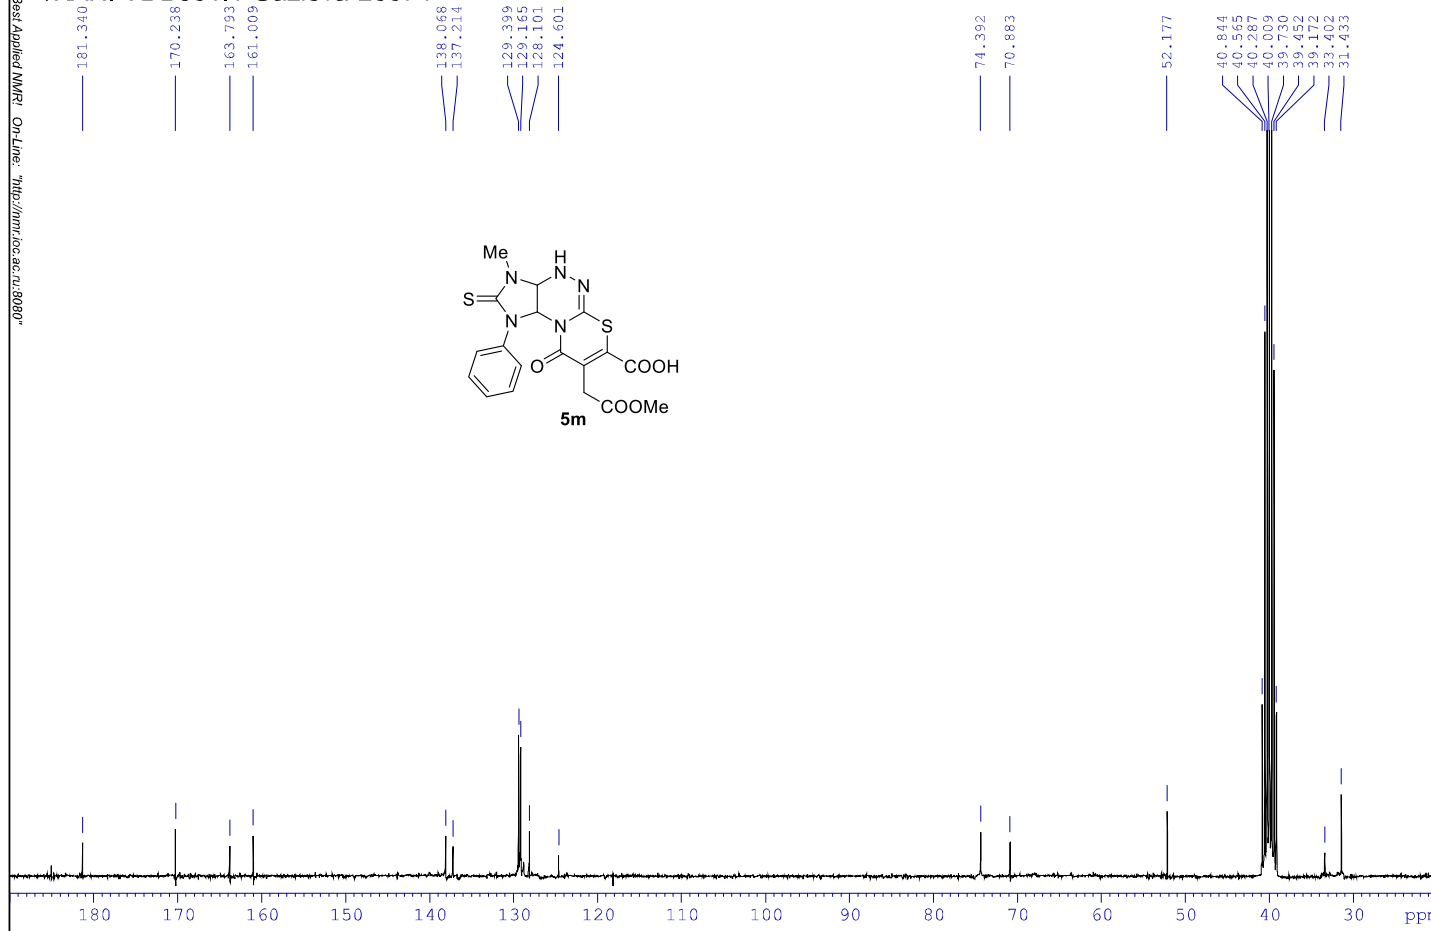

/KANI Kao86.4

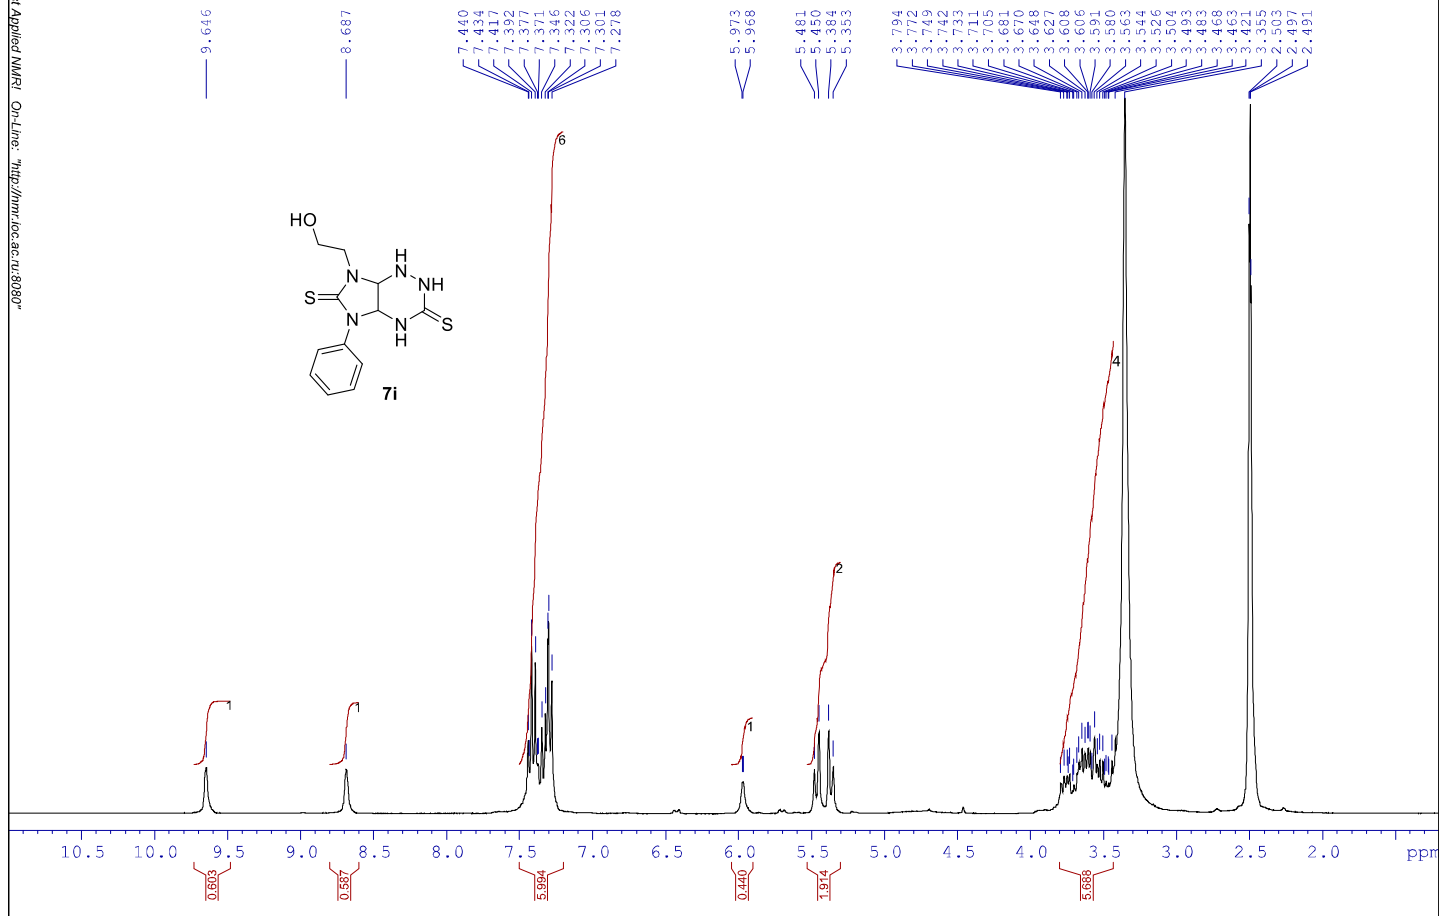



/KANI KAO86.31

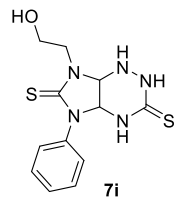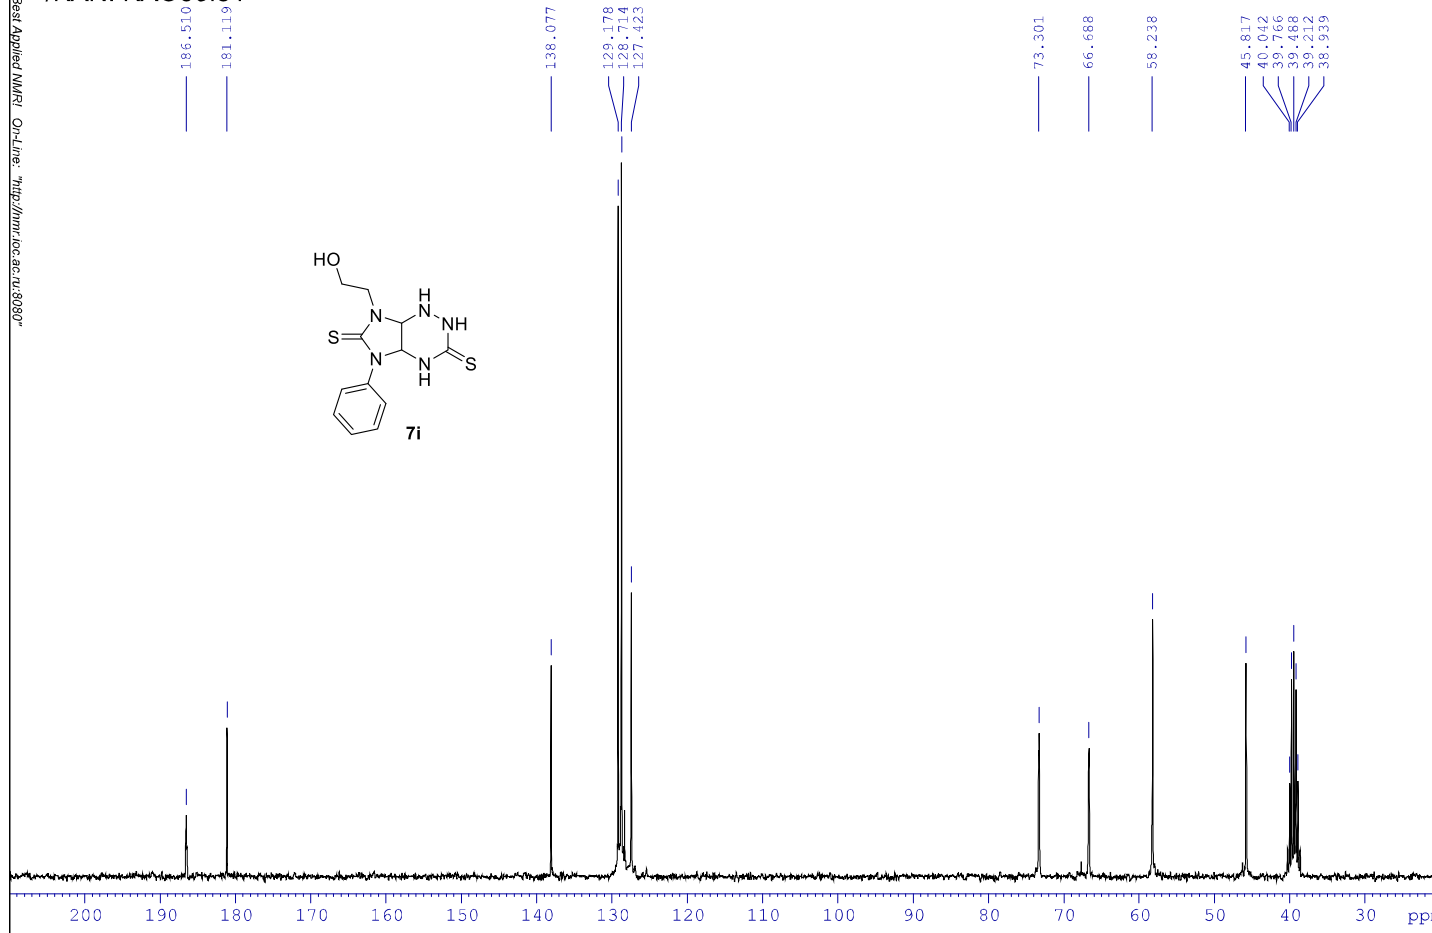

/KANI IA1831.2

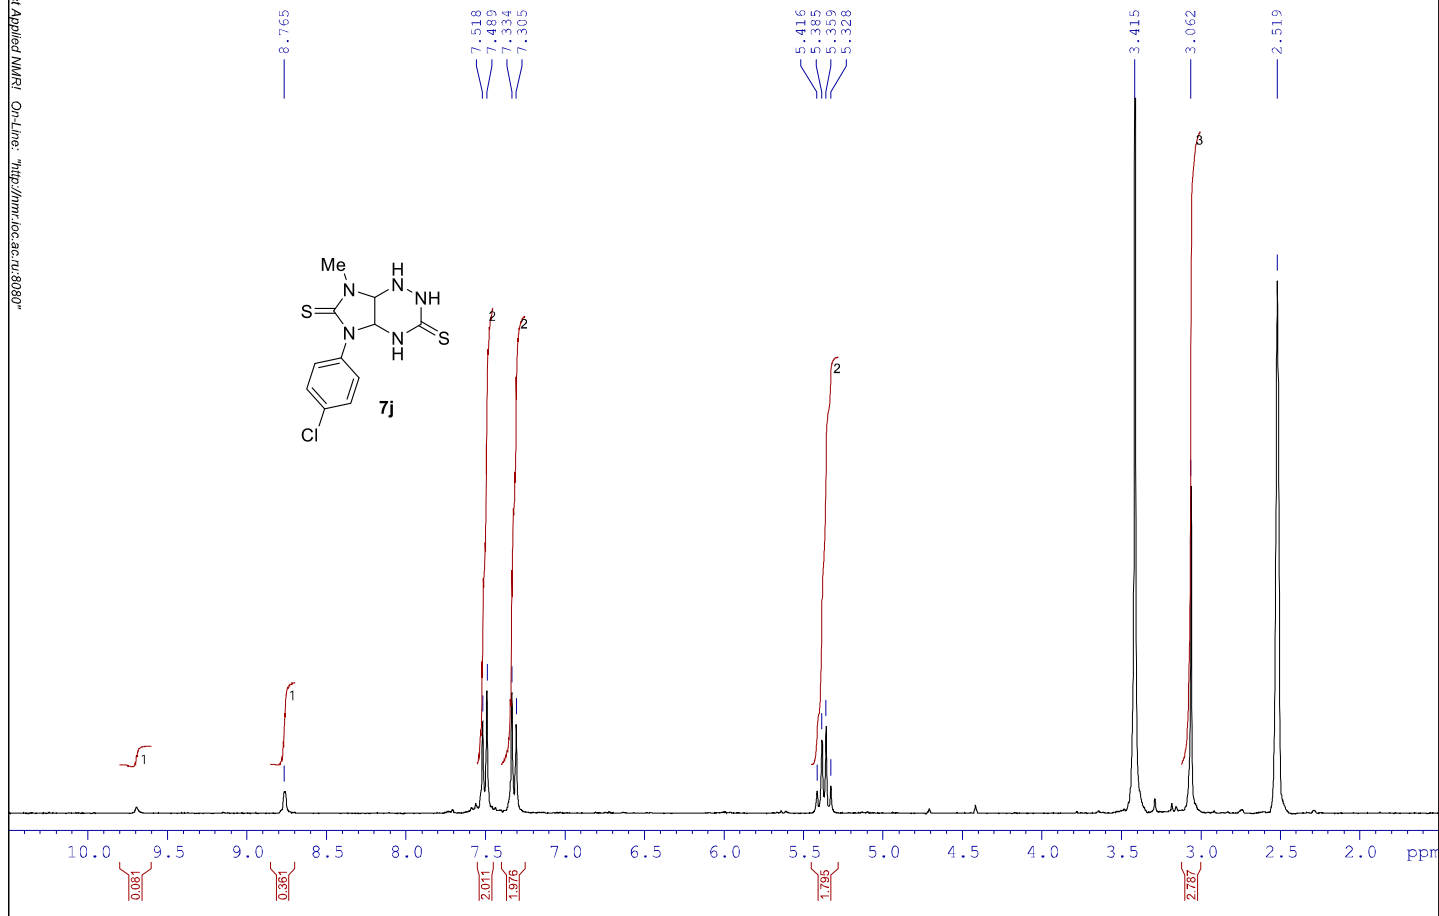

/KANI IA1831.1

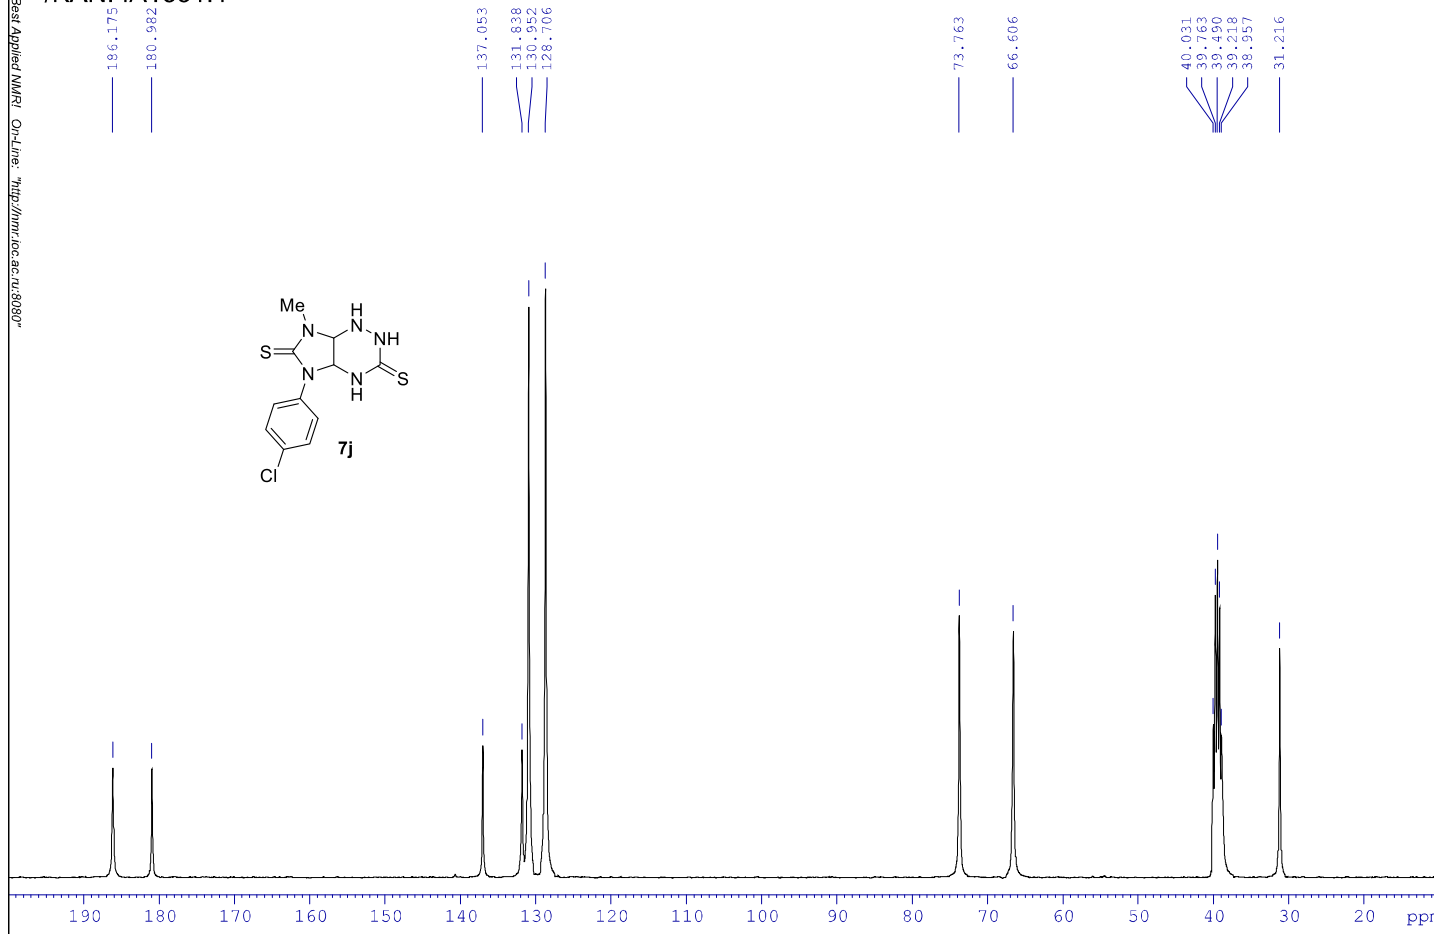

/KANI VDB591.1.1 Gazieva-20074

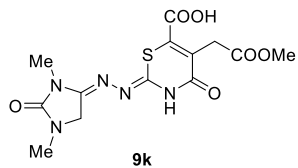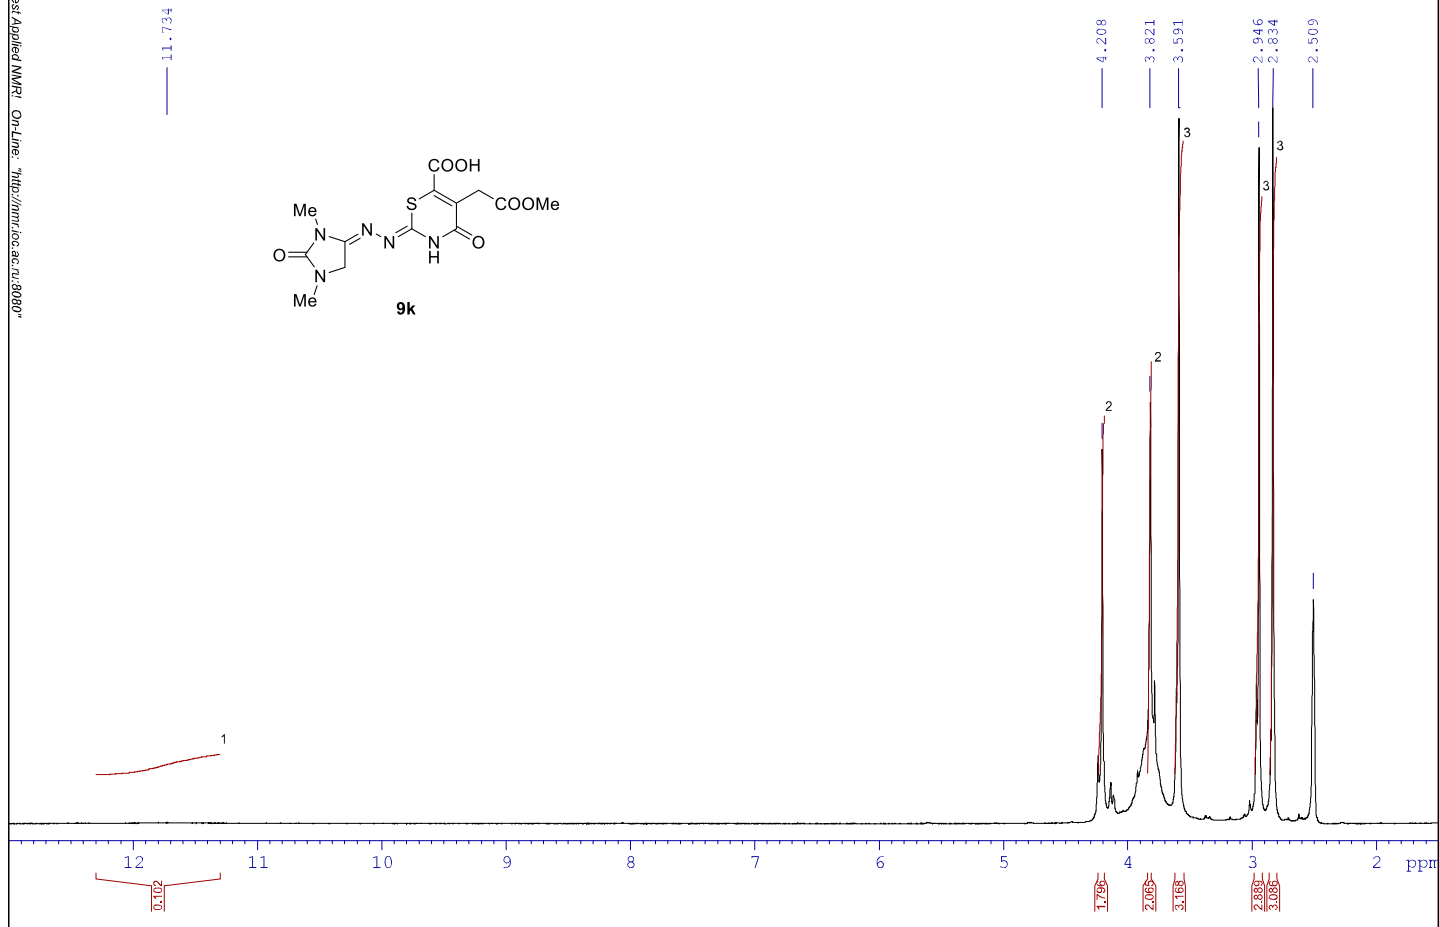

/KANI VDB591.1.1 Gazieva-20074

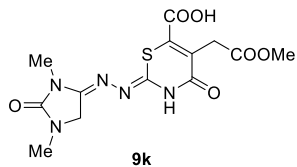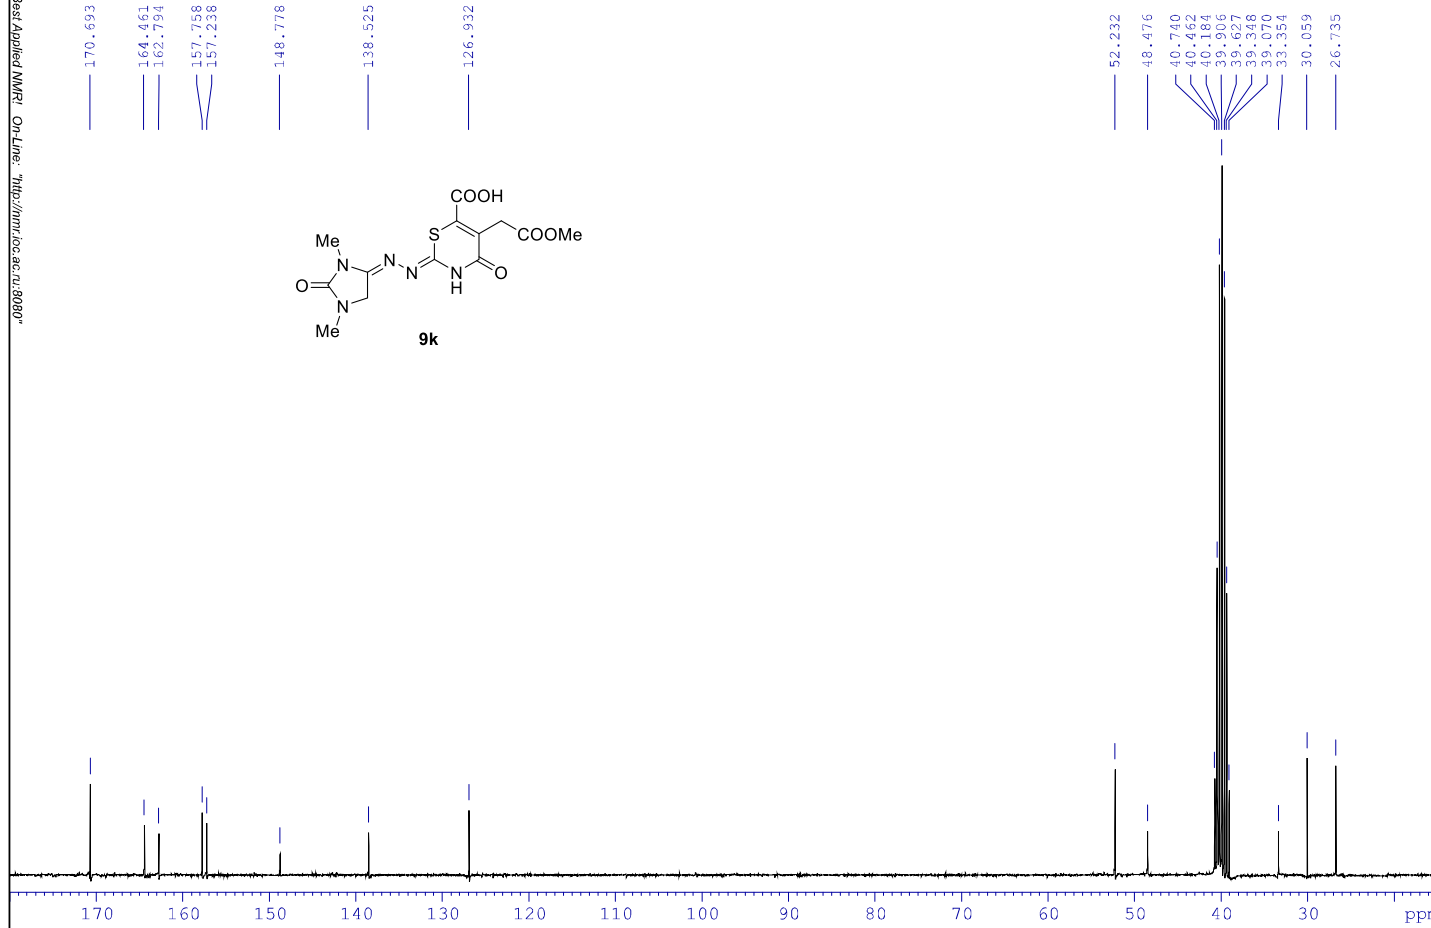

/KANI VDB591.1.1 Gazieva-20074  
HMBP

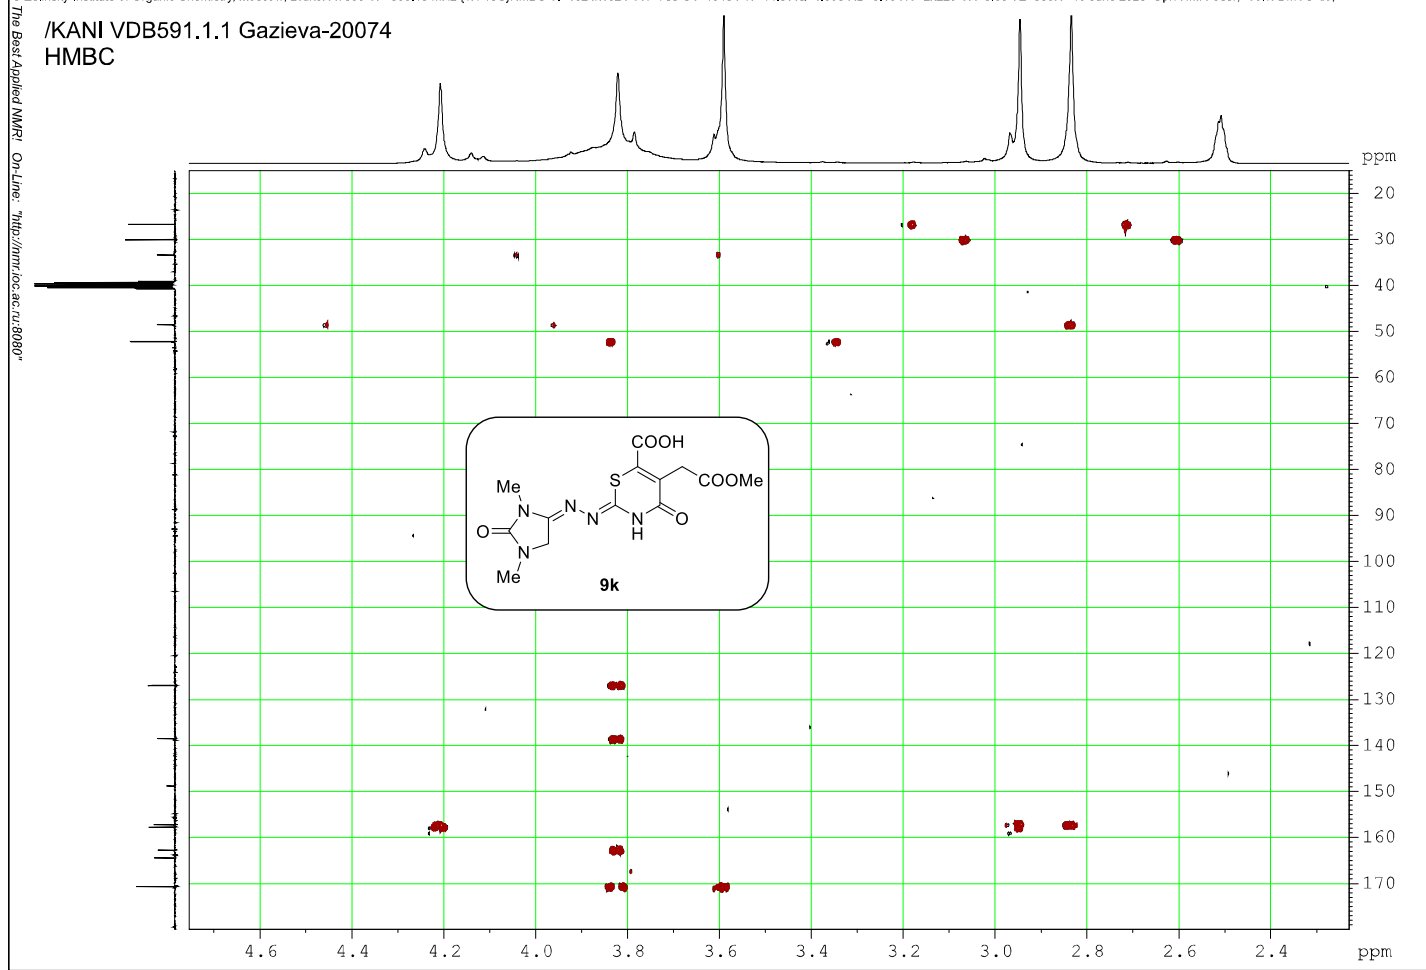

/KANI VDB595.2 Gazieva-20074

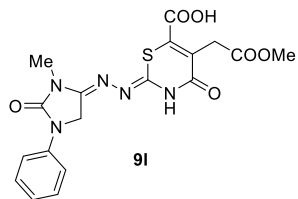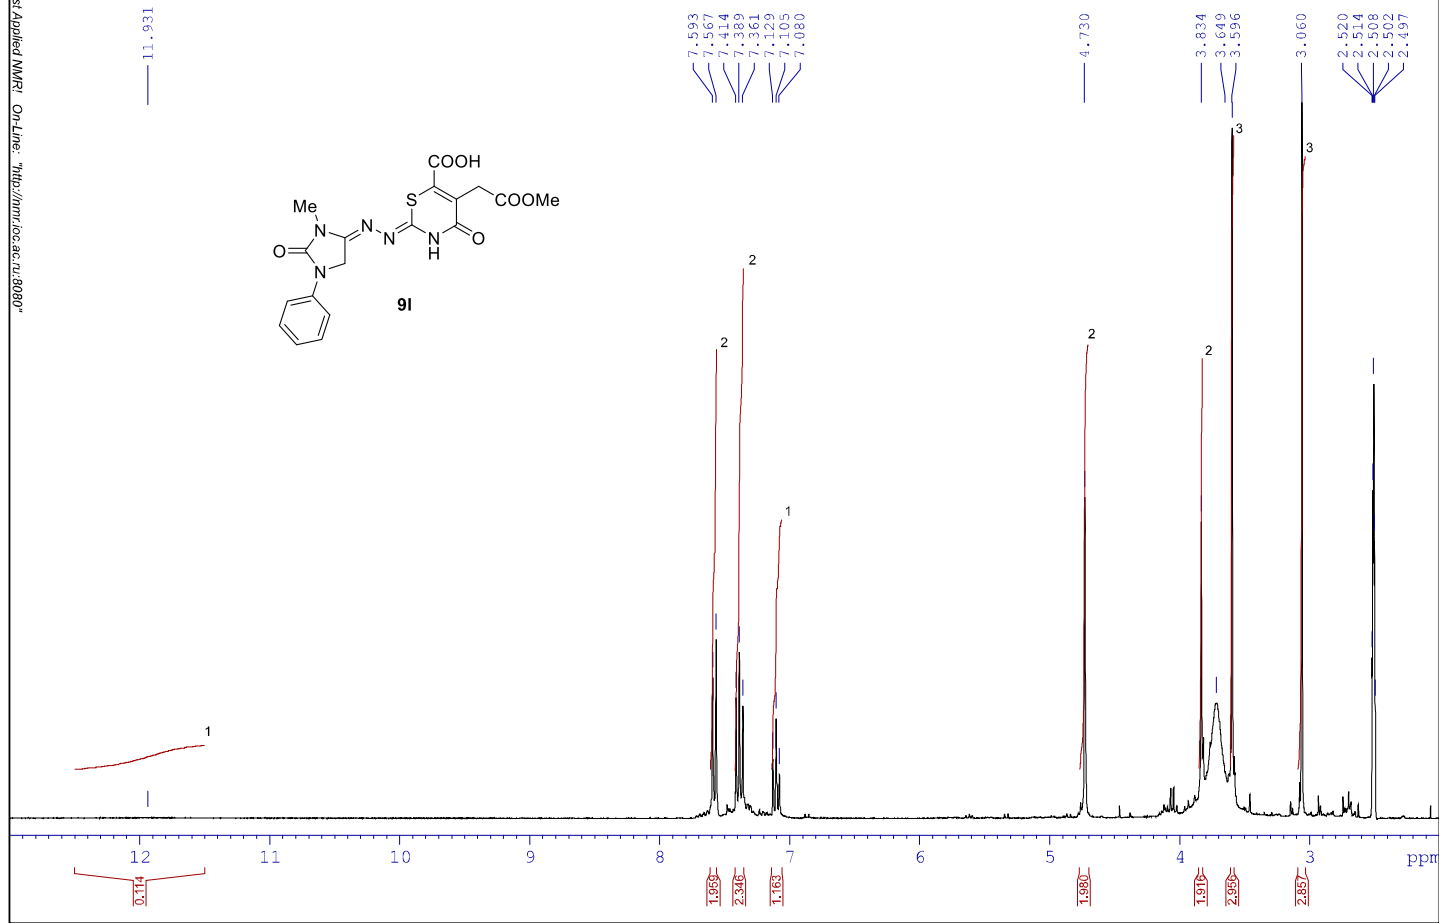

/KANI VDB595.2.1 Gazieva-20074

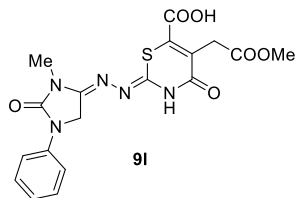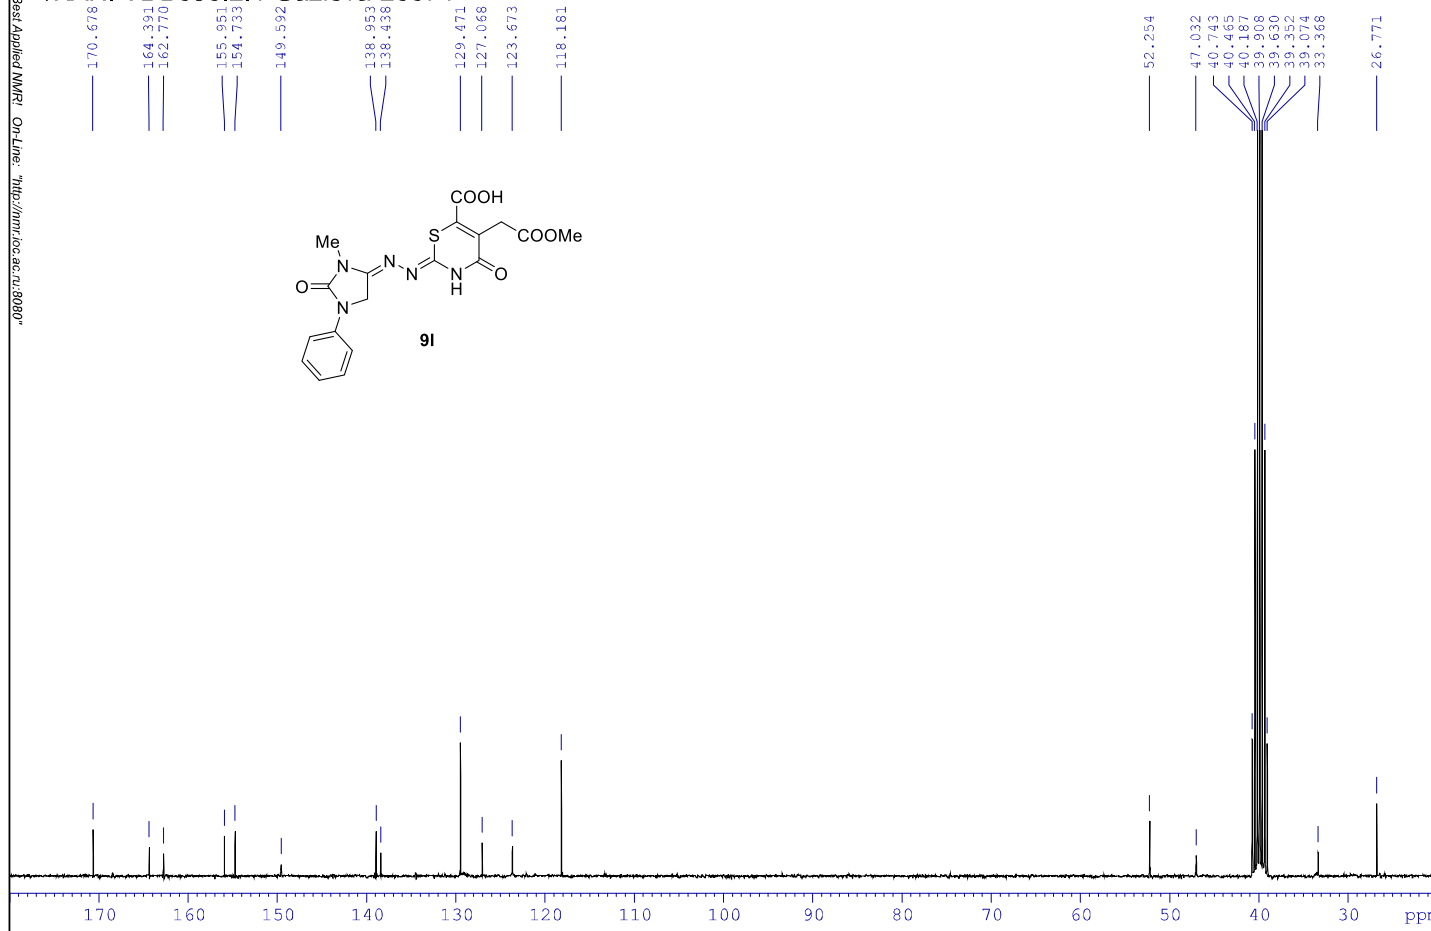



/KANI VDB595.2.1 Gazieva-20074  
HMBC

The Best Applied NMR On-Line: <http://mr.roc.ac.ru/8080>

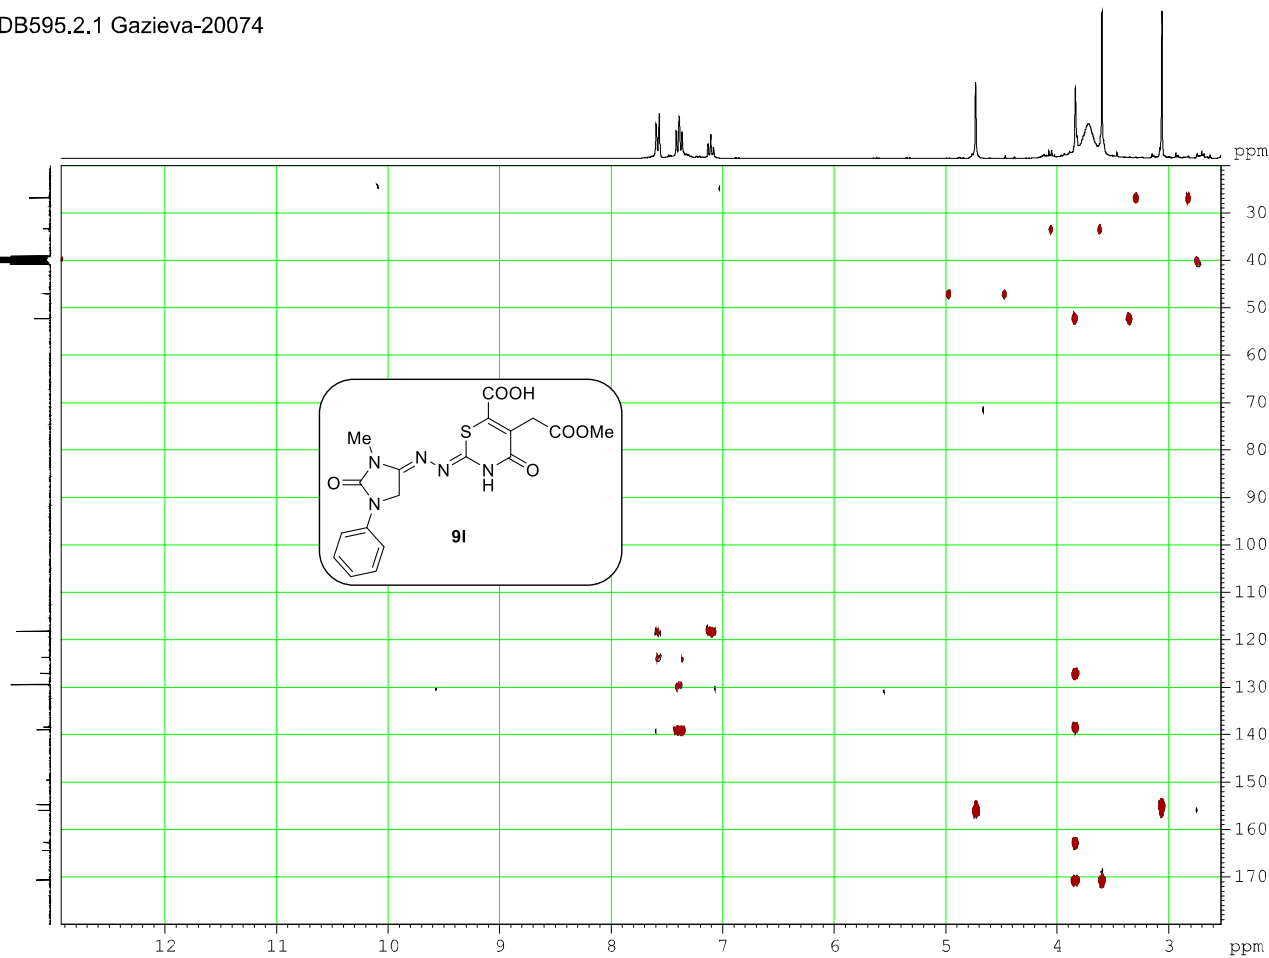

/KANI IA1823.1

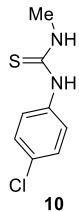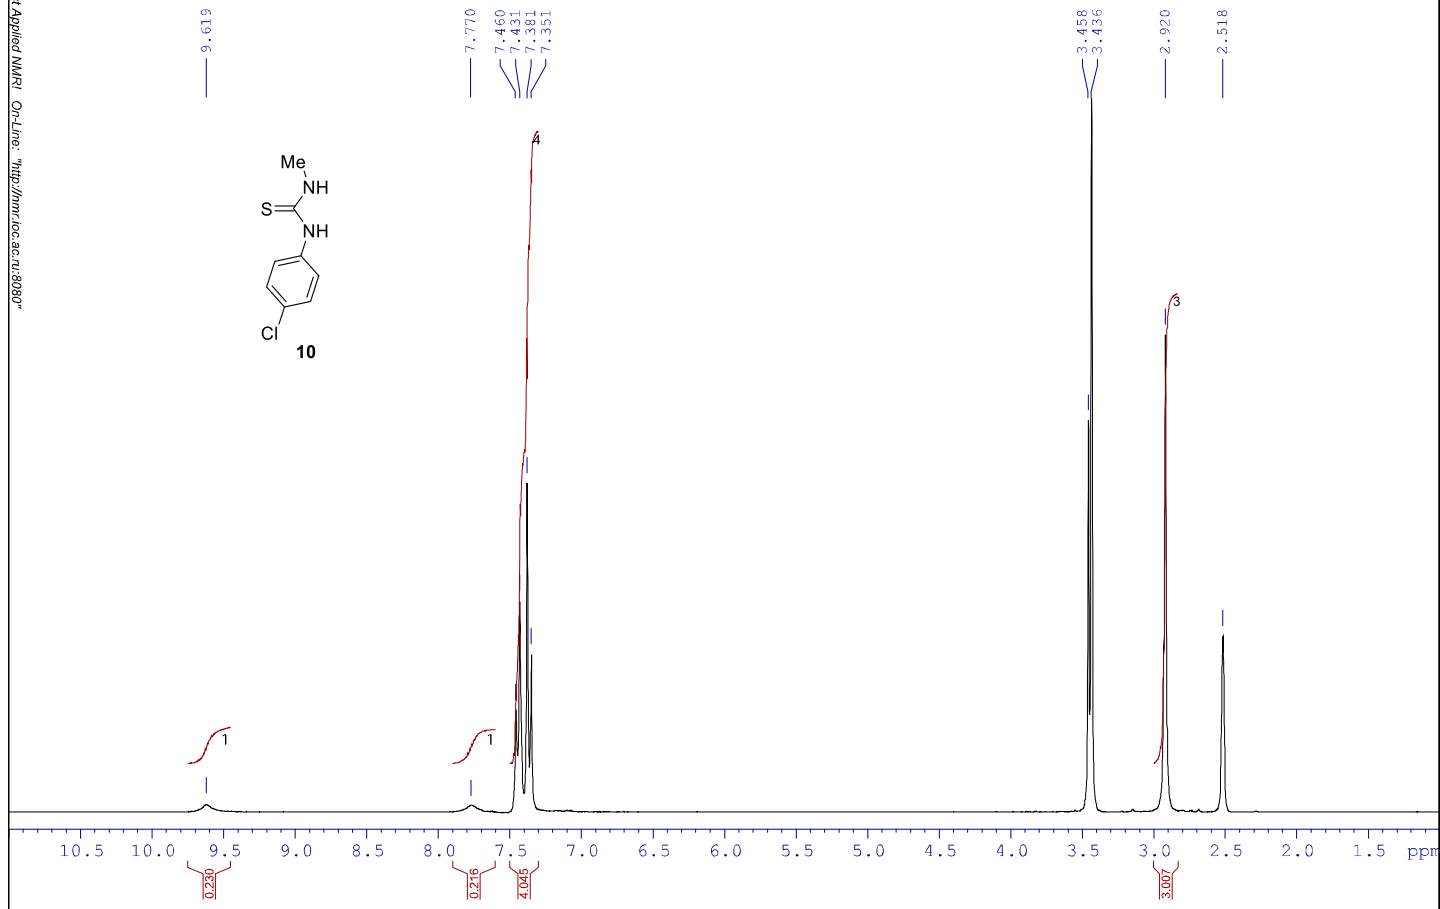

/KANI IA1823.1

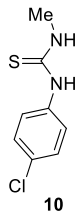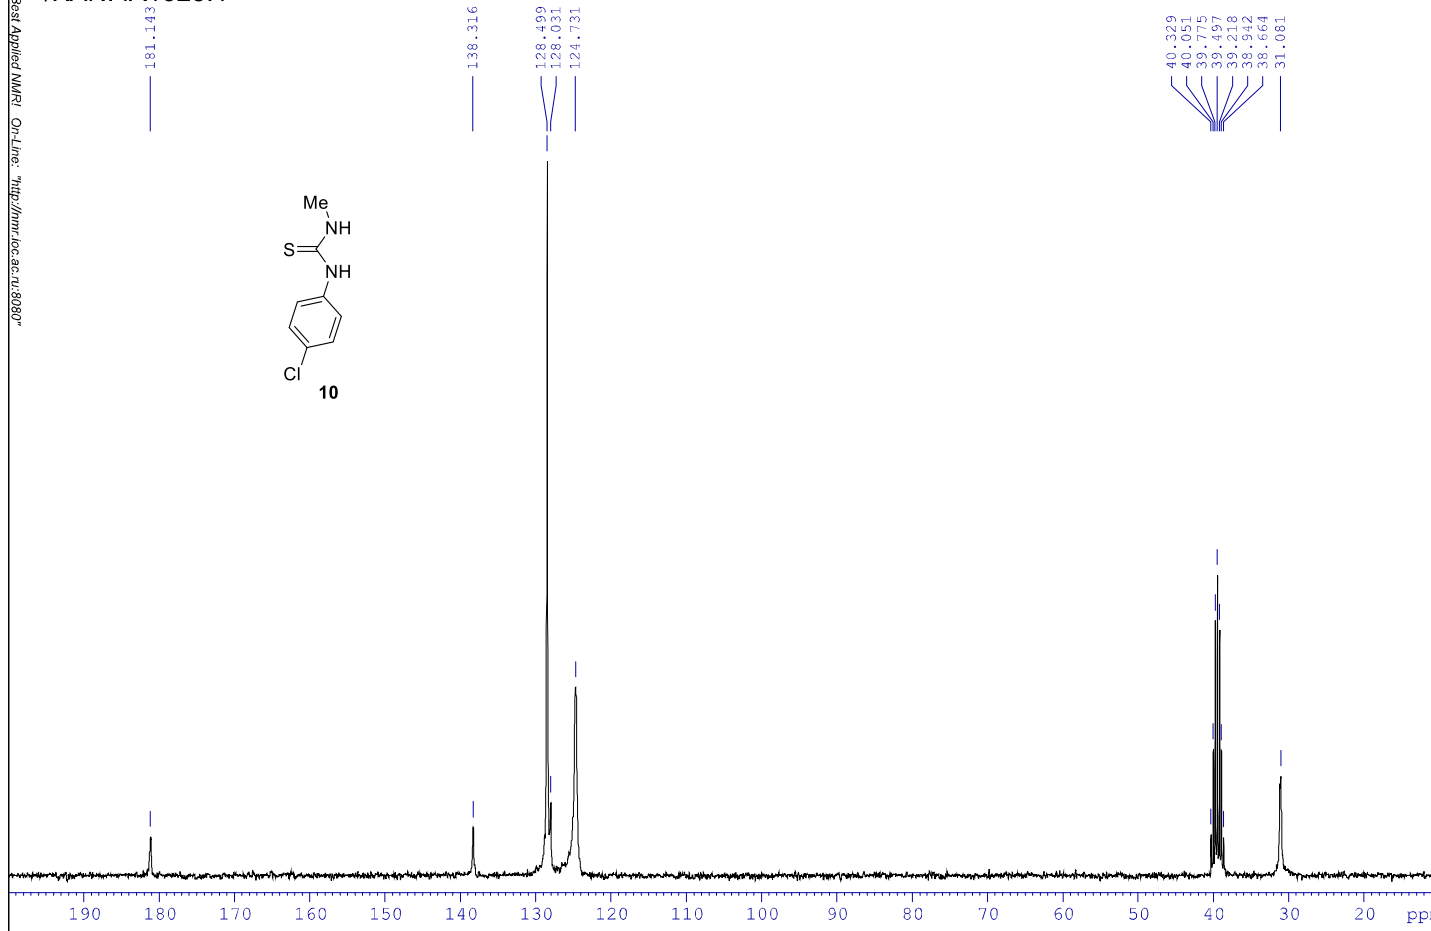

# /KANI IA1417.4 {13C} GATED

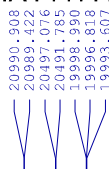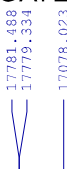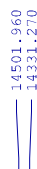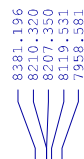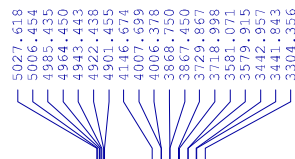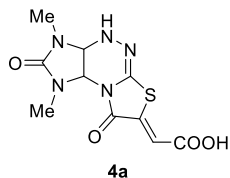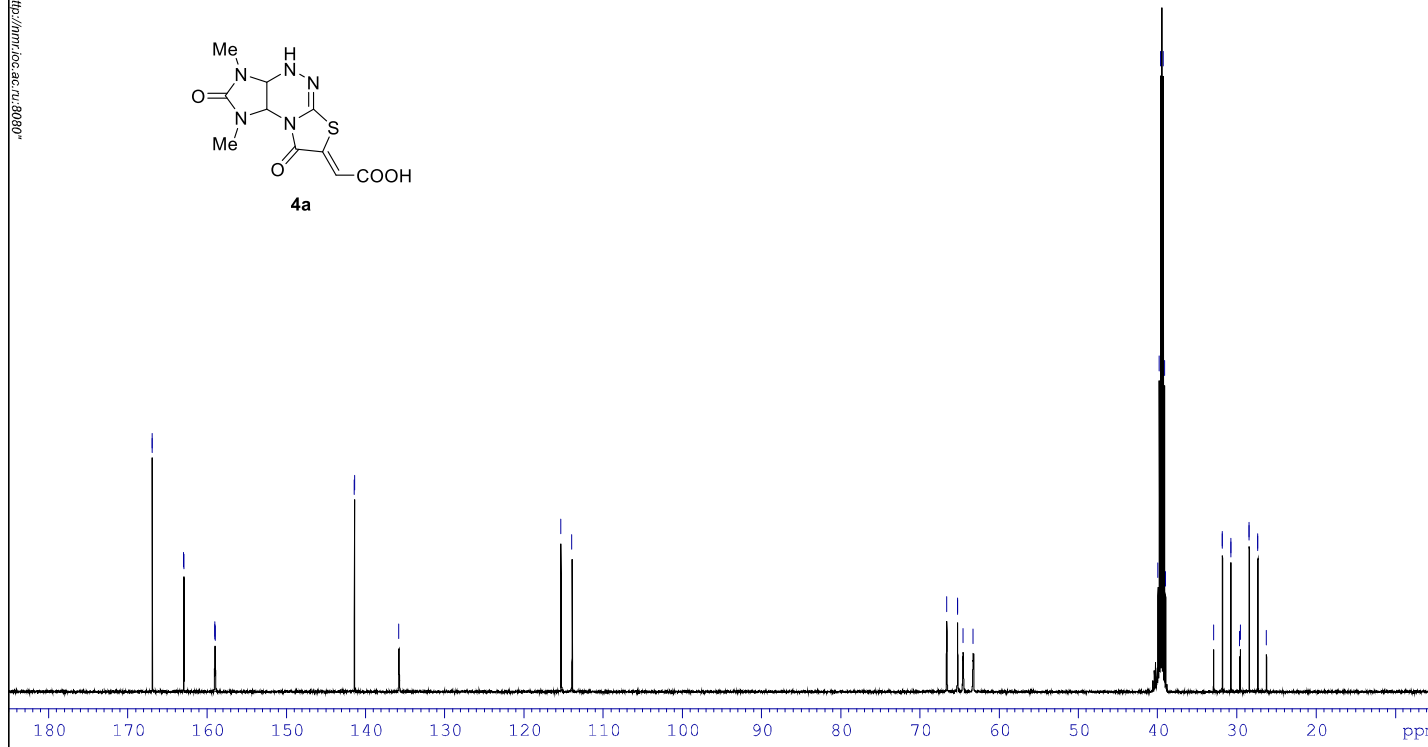

# /KANI IA1190.4 {13C} GATED

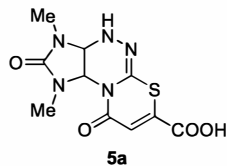

20462.393  
20456.363  
20246.012  
20244.621  
19843.478  
19831.988  
19828.832  
19824.898  
19821.691

17944.322

17074.787  
17071.014

15140.728  
14965.508

8857.165  
8695.686  
8594.021  
8591.458  
8420.828  
8418.076

5021.790  
5000.958  
4979.938  
4958.950  
4937.937  
4916.920  
4895.734  
3801.701  
3668.768  
3662.767  
3530.864  
3529.615  
3524.169  
3392.864  
3391.619  
3385.791  
3253.884

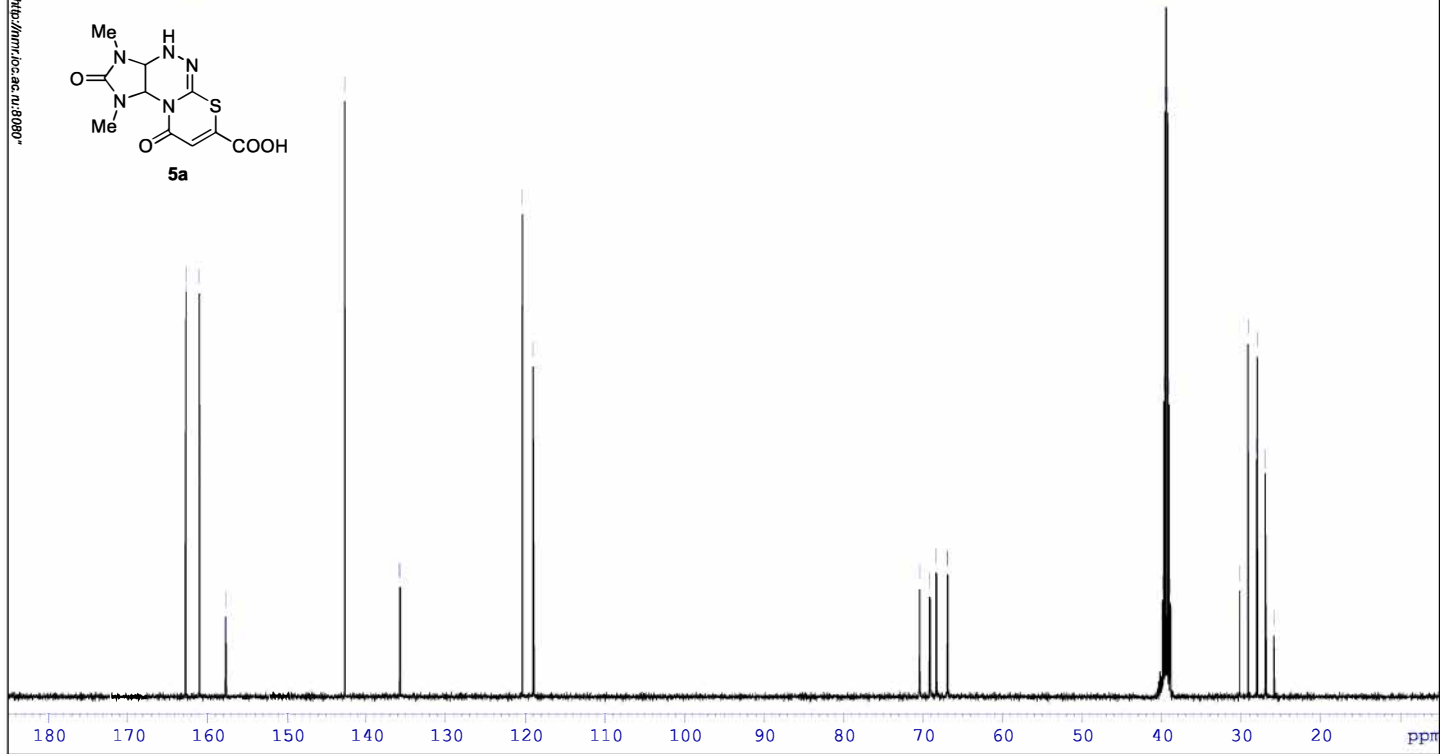

Supplement: Additional file 1 [file 1860-5397-19-80-S1.pdf]
